# Supplementary material
Source: PubMed Central journal article supplement (PMC9544232)

# ChemMedChem

Supporting Information

## **Further Exploration of the Benzimidazole Scaffold as TRPC5 Inhibitors: Identification of 1-Alkyl-2-(pyrrolidin-1-yl)-1*H*-benzo[*d*]imidazoles as Potent and Selective Inhibitors**

Swagat Sharma<sup>+</sup>, Juan L. Pablo<sup>+</sup>, Kirsten T. Tolentino, Wacey Gallegos, Jennifer Hinman, Madison Beninato, MacKenzie Asche, Anna Greka, and Corey R. Hopkins\*

## Table of Contents:

|                                          |   |
|------------------------------------------|---|
| Table 1. PDSP Selectivity                | 2 |
| $^1\text{H}$ and $^{13}\text{C}$ Spectra | 4 |

**Supplemental Table 1.** PDSP Selectivity of select compounds (Compounds tested at 10  $\mu$ M)

| <b>16f</b>      |               | <b>9o</b>       |               |
|-----------------|---------------|-----------------|---------------|
| <b>Receptor</b> | <b>Mean %</b> | <b>Receptor</b> | <b>Mean %</b> |
| 5-HT1A          | 0.33          | 5-HT1A          | -8.04         |
| 5-HT1B          | -13.18        | 5-HT1B          | -19.32        |
| 5-HT1D          | -20.3         | 5-HT1D          | -36.91        |
| 5-HT1E          | 0.77          | 5-HT1E          | -3.93         |
| 5-HT2A          | 59.82         | 5-HT2A          | 5.32          |
| 5-HT2B          | 96.32         |                 |               |
| Ki              | 258.6 nM      | 5-HT2B          | 30.36         |
| 5-HT2C          | 79.97         | 5-HT2C          | 14.42         |
| 5-HT3           | -1.96         | 5-HT3           | -12.44        |
| 5-HT5A          | 24.76         | 5-HT5A          | -14.99        |
| 5-HT6           | 36.62         | 5-HT6           | 6.5           |
| 5-HT7A          | 13.51         | 5-HT7A          | -11.23        |
| Alpha1A         | -2.69         | Alpha1A         | -11.68        |
| Alpha1B         | 16.13         | Alpha1B         | -7.54         |
| Alpha1D         | 10.22         | Alpha1D         | -11.06        |
| Alpha2A         | 90.23         | Alpha2A         | 31.63         |
| Alpha2B         | 82.96         |                 |               |
| Ki              | 676.7 nM      | Alpha2B         | 18.67         |
| Alpha2C         | 84.82         |                 |               |
| Ki              | 434.3 nM      | Alpha2C         | 16.07         |
| Beta1           | 19.53         | Beta1           | -9.19         |
| Beta2           | -10.17        | Beta2           | 0             |

|            |            |
|------------|------------|
| BZP Rat    |            |
| Brain Site | 19.87      |
| D1         | 37.8       |
| D2         | 1.09       |
| D3         | 40.77      |
| D4         | 2.14       |
| D5         | 69.61      |
| Ki         | 5,661.1 nM |
| DAT        | 24.3       |
| DOR        | -5.69      |
| GABAA      | -5.57      |
| GABAA      | -1.19      |
| H1         | 97.85      |
| Ki         | 6.2 nM     |
| H2         | 83.29      |
| H3         | -5.56      |
| H4         | -8.89      |
| KOR        | 11.13      |
| M1         | -16.1      |
| M2         | 13.73      |
| M3         | -39.68     |
| M4         | -7.49      |
| M5         | 14.48      |
| MOR        | 12.36      |
| NET        | 21.91      |

|            |            |
|------------|------------|
| BZP Rat    |            |
| Brain Site | 16.77      |
| D1         | 23.25      |
| D2         | -11.49     |
| D3         | 39.31      |
| D4         | -0.93      |
| D5         | 48.69      |
| DAT        | 19.34      |
| DOR        | -11.39     |
| GABAA      | 13.14      |
| GABAA      | 14.18      |
| H1         | 72.98      |
| Ki         | 2,572.8 nM |
| H2         | 64.13      |
| H3         | 1.97       |
| H4         | -16.01     |
| KOR        | -11.71     |
| M1         | -15.52     |
| M2         | 7.75       |
| M3         | -31.15     |
| M4         | -6.19      |
| M5         | 10.9       |
| MOR        | -6.78      |
| NET        | 39.4       |

|         |        |         |         |
|---------|--------|---------|---------|
| PBR     | 49.22  | PBR     | 76.69   |
| SERT    | -8.27  | SERT    | -16.85  |
| Sigma 1 | -18.76 | Sigma 1 | -19.5   |
|         |        |         | 88.88   |
| Sigma 2 | 54     | Sigma 2 | 7,333.3 |
|         |        | Ki      | nM      |

# <sup>1</sup>H and <sup>13</sup>C Spectra:

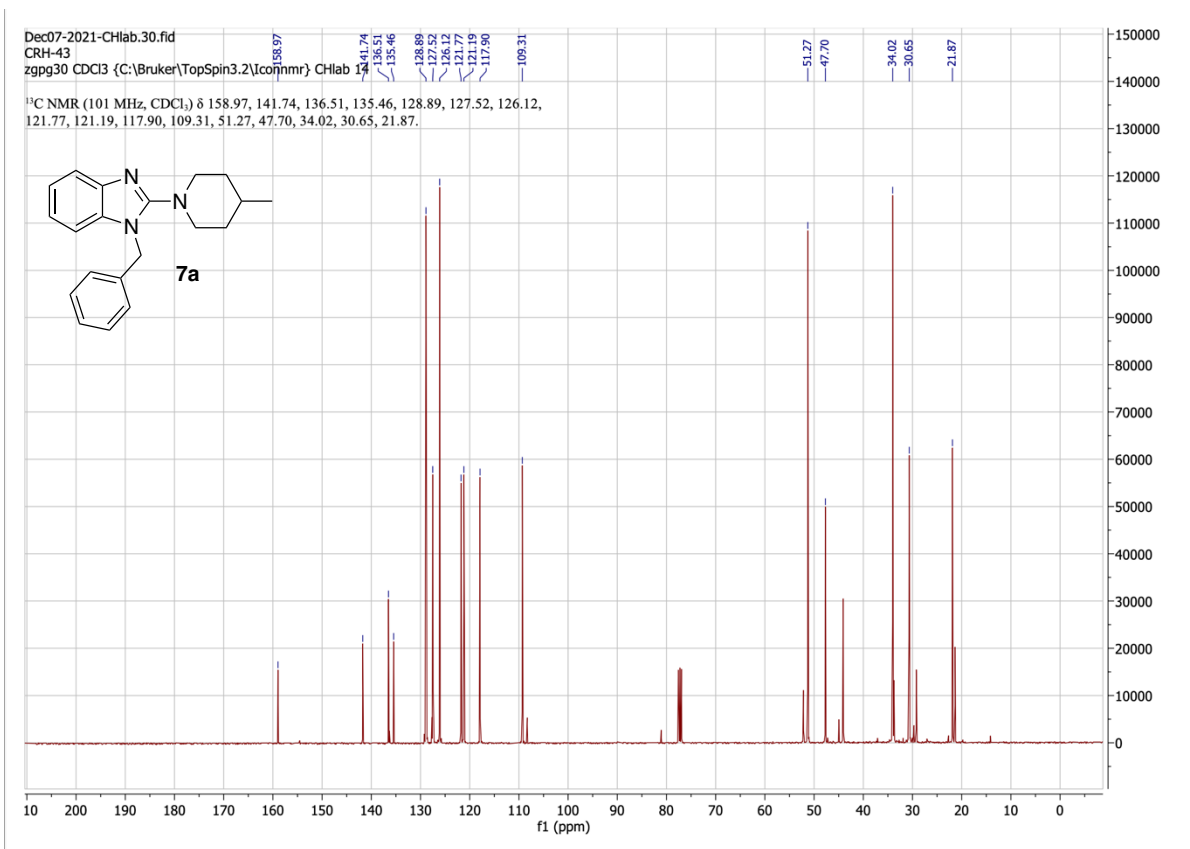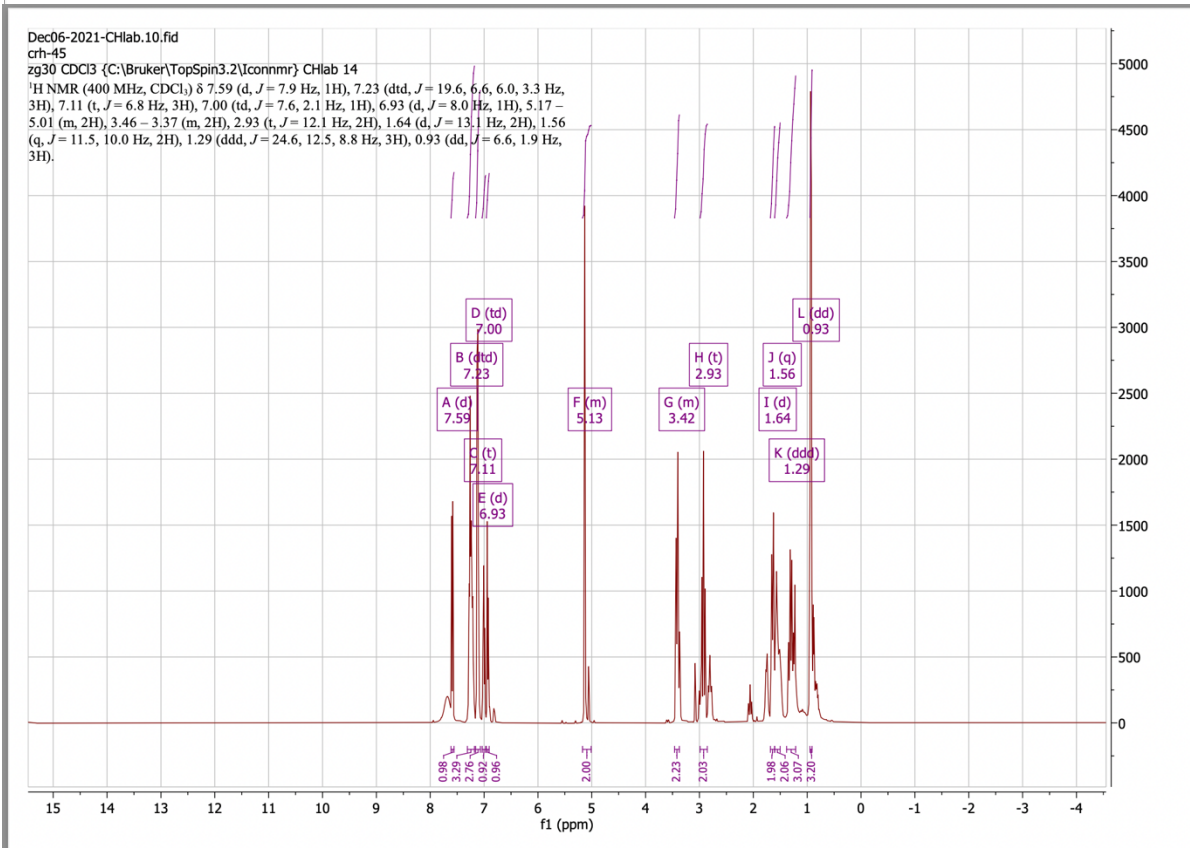

Dec07-2021-CHlab.41.fid  
 CRH-47-C  
 zgpg30 CDCl3 {C:\Bruker\TopSpin3.2\iconnmr} CHlab 15  
<sup>13</sup>C NMR (101 MHz, CDCl<sub>3</sub>) δ 159.10, 141.72, 136.54, 135.46, 128.93, 127.57, 126.77, 126.83, 121.24, 117.97, 109.37, 51.96, 47.75, 25.77, 24.22.

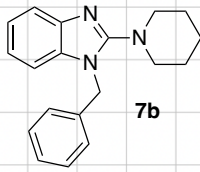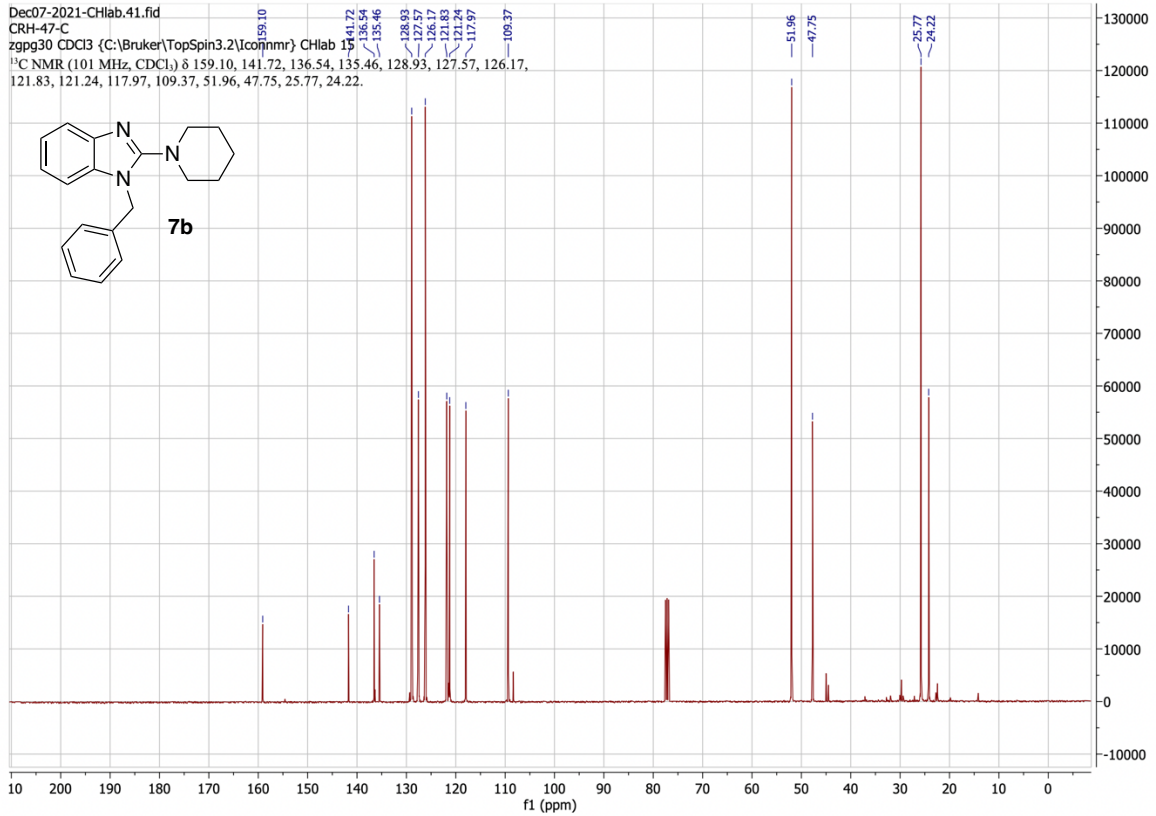

Dec07-2021-CHlab.40.fid  
 CRH-47  
 zg30 CDCl3 {C:\Bruker\TopSpin3.2\iconnmr} CHlab 15  
<sup>1</sup>H NMR (400 MHz, CDCl<sub>3</sub>) δ 7.66 (d, *J* = 7.9 Hz, 1H), 7.31 (dt, *J* = 13.7, 6.8 Hz, 3H), 7.19 (dt, *J* = 6.7, 3.1 Hz, 3H), 7.07 (t, *J* = 7.6 Hz, 1H), 7.00 (d, *J* = 7.9 Hz, 1H), 5.20 (s, 2H), 3.26 – 3.18 (m, 4H), 1.69 (p, *J* = 5.8 Hz, 4H), 1.62 (q, *J* = 7.1, 5.9 Hz, 2H).

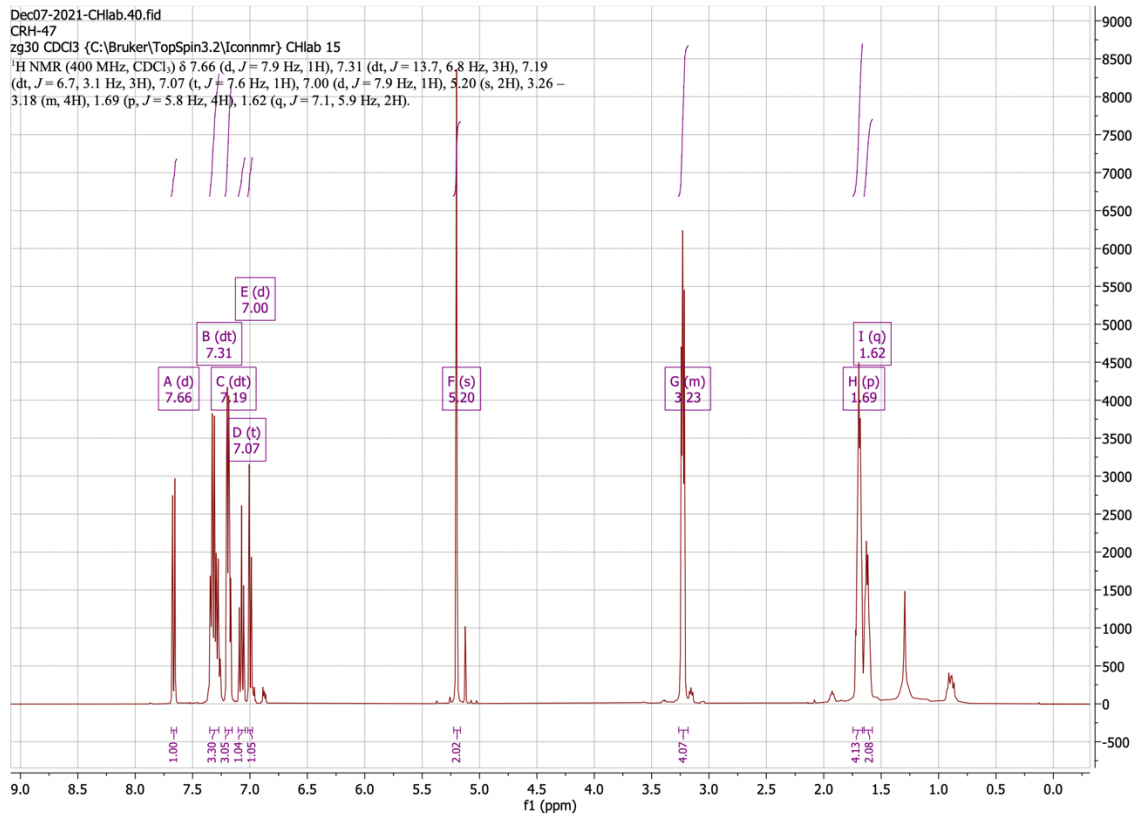

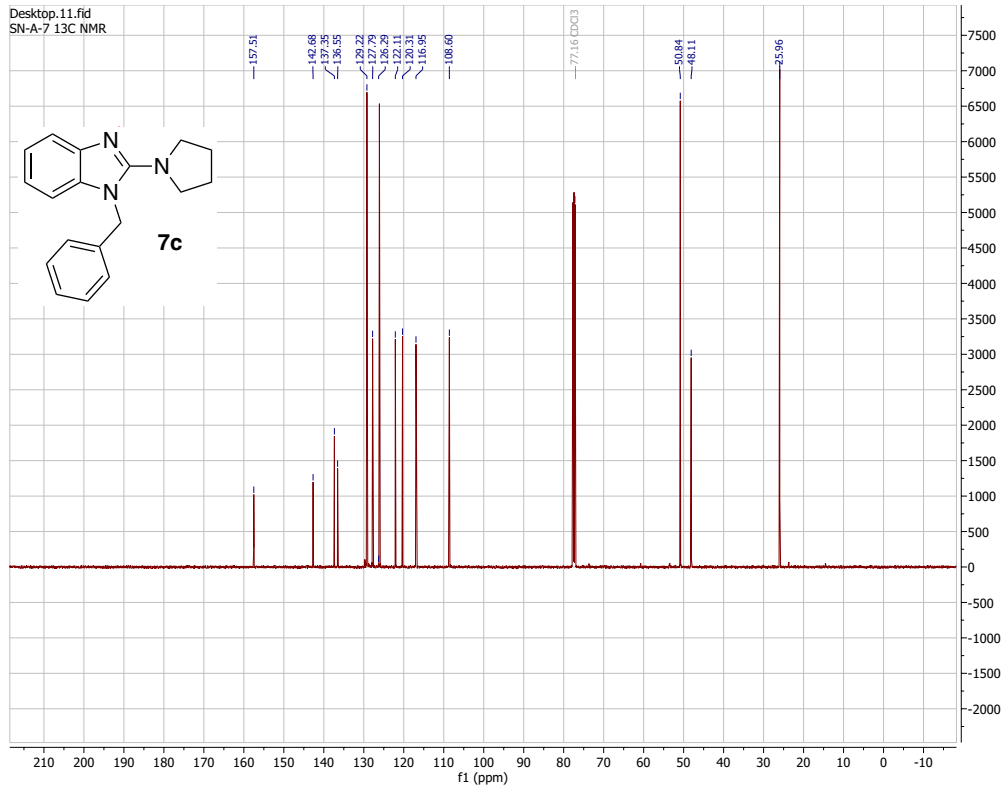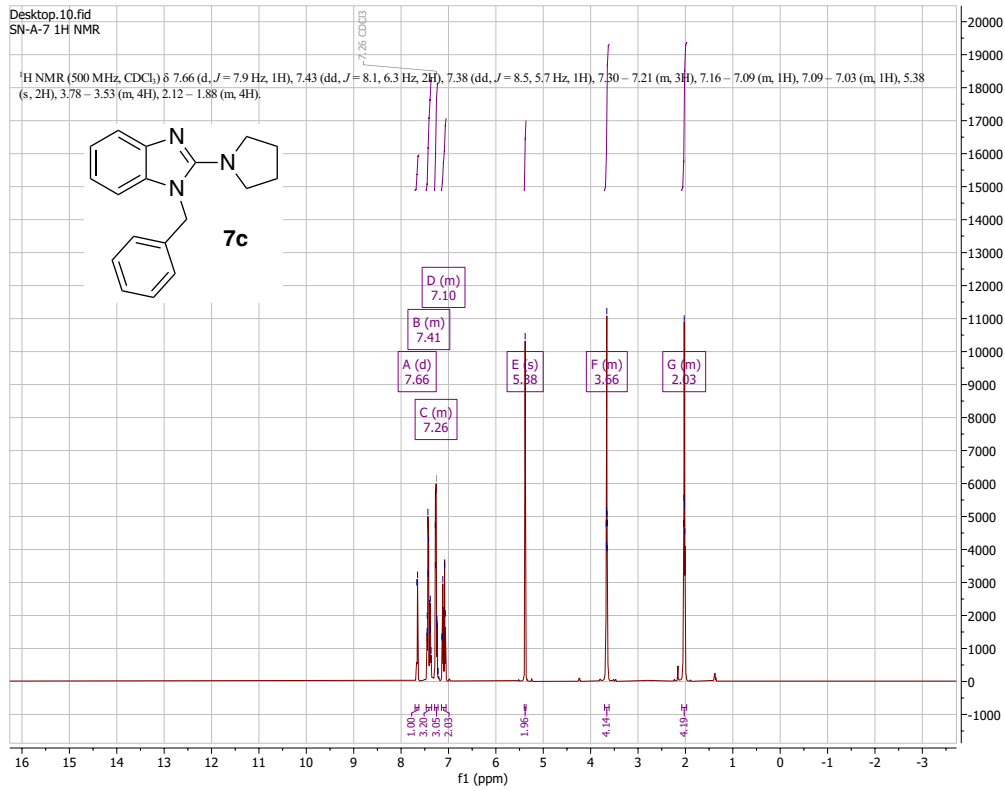



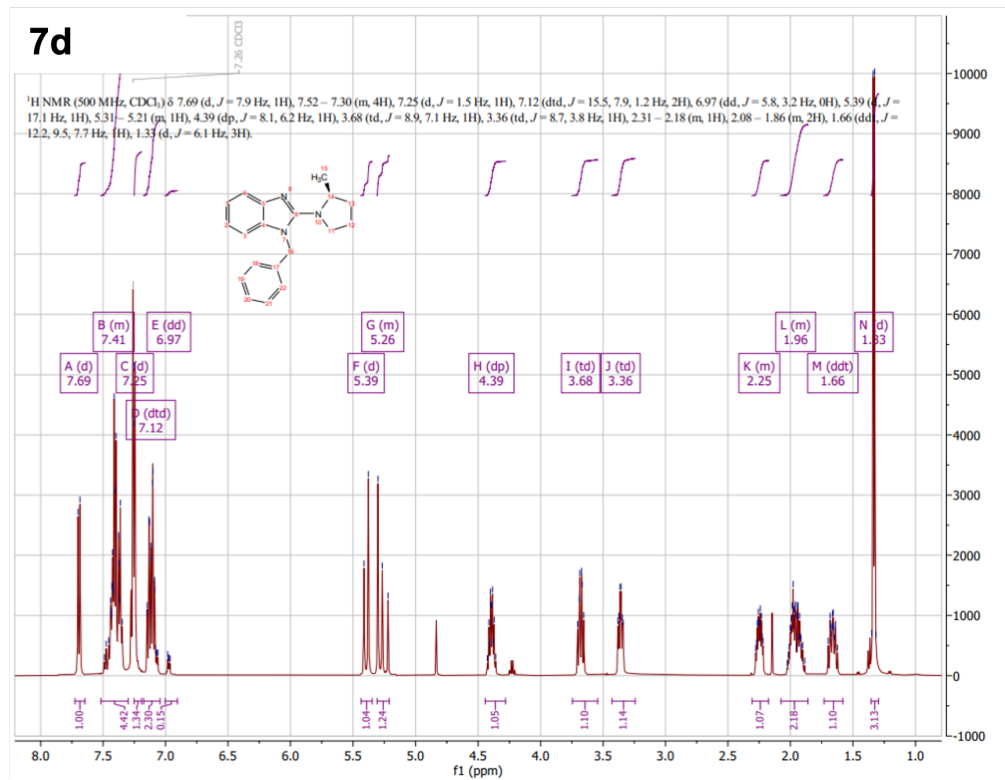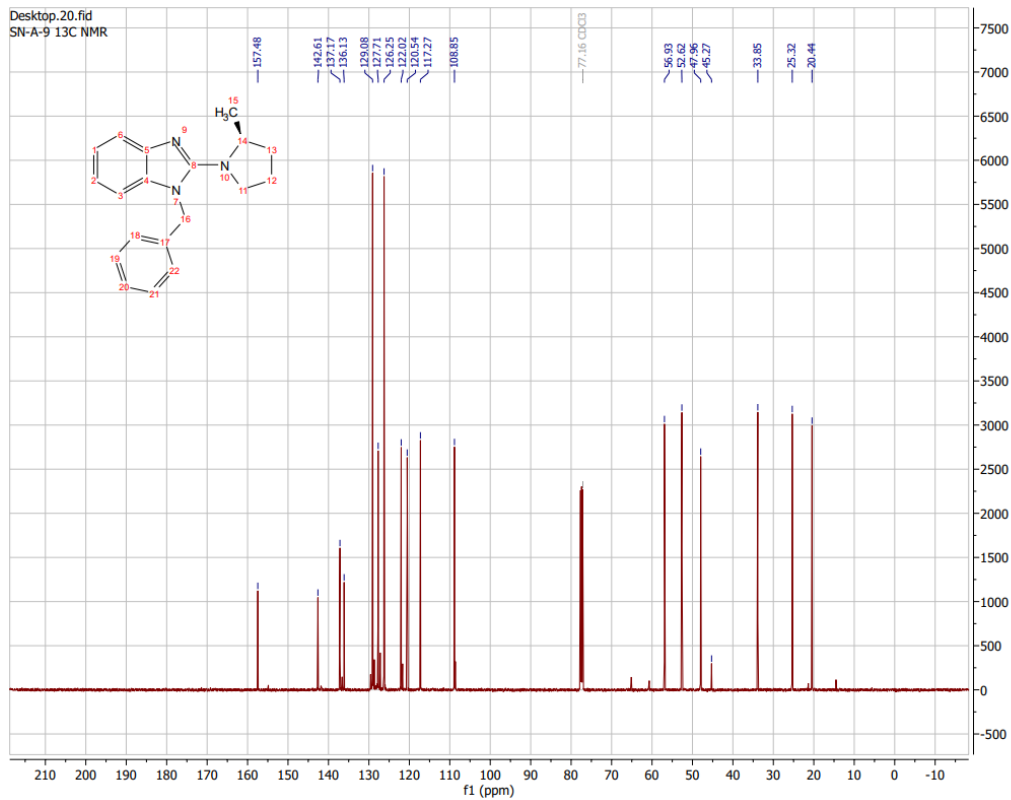

# 7e

<sup>1</sup>H NMR (500 MHz, CDCl<sub>3</sub>) δ 7.54 (d, *J* = 7.9 Hz, 1H), 7.29–7.18 (m, 3H), 7.14–7.06 (m, 3H), 6.96 (dtd, *J* = 15.1, 7.9, 1.3 Hz, 2H), 5.48–4.94 (m, 2H), 4.24 (dp, *J* = 8.5, 6.2 Hz, 1H), 3.53 (dd, *J* = 8.9, 7.1 Hz, 1H), 3.21 (dd, *J* = 8.7, 3.8 Hz, 1H), 2.10 (dtd, *J* = 11.0, 6.8, 3.9 Hz, 1H), 1.90–1.70 (m, 2H), 1.51 (dtd, *J* = 12.3, 9.5, 7.7 Hz, 1H), 1.17 (d, *J* = 6.1 Hz, 3H).

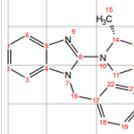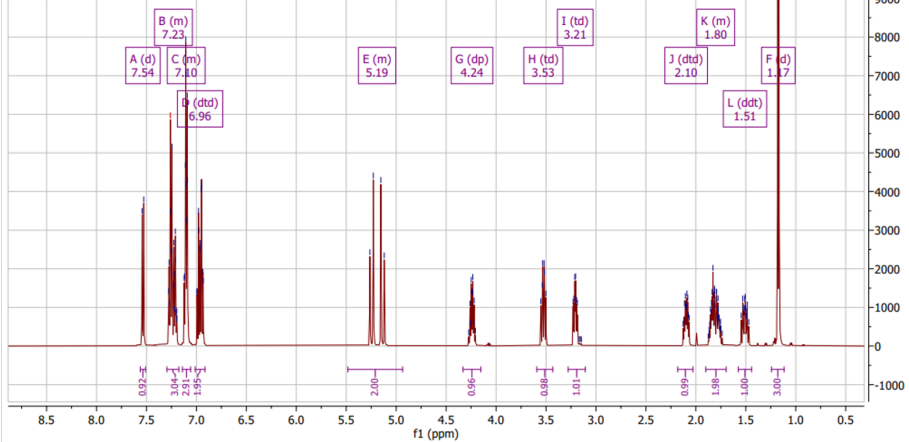

Desktop.30.fid  
SN-A-11 13C NMR.

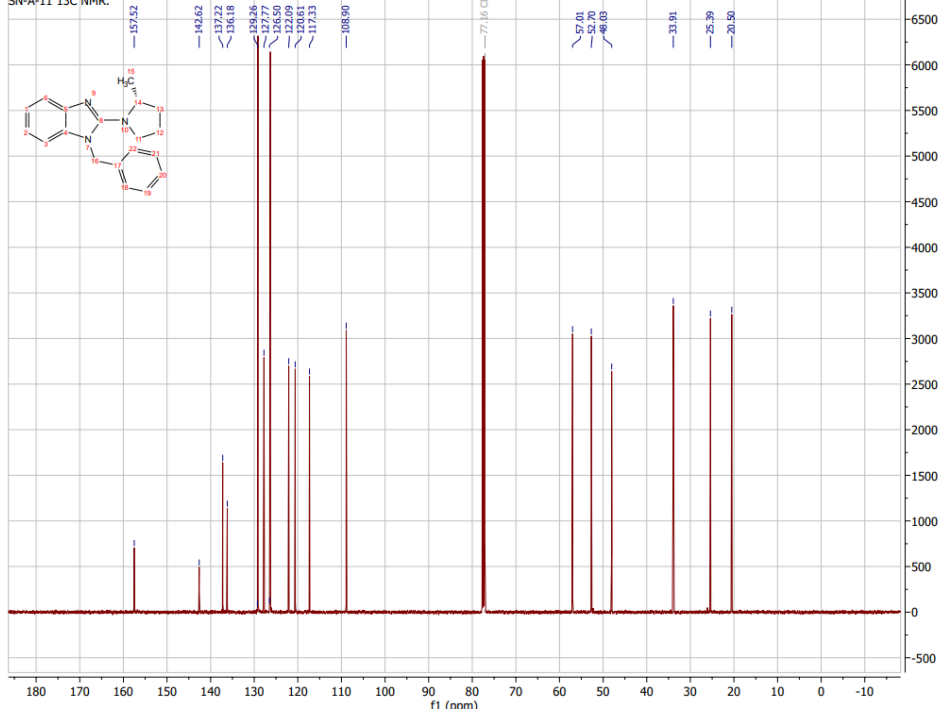

Dec-13-2018  
SS-E-64-C

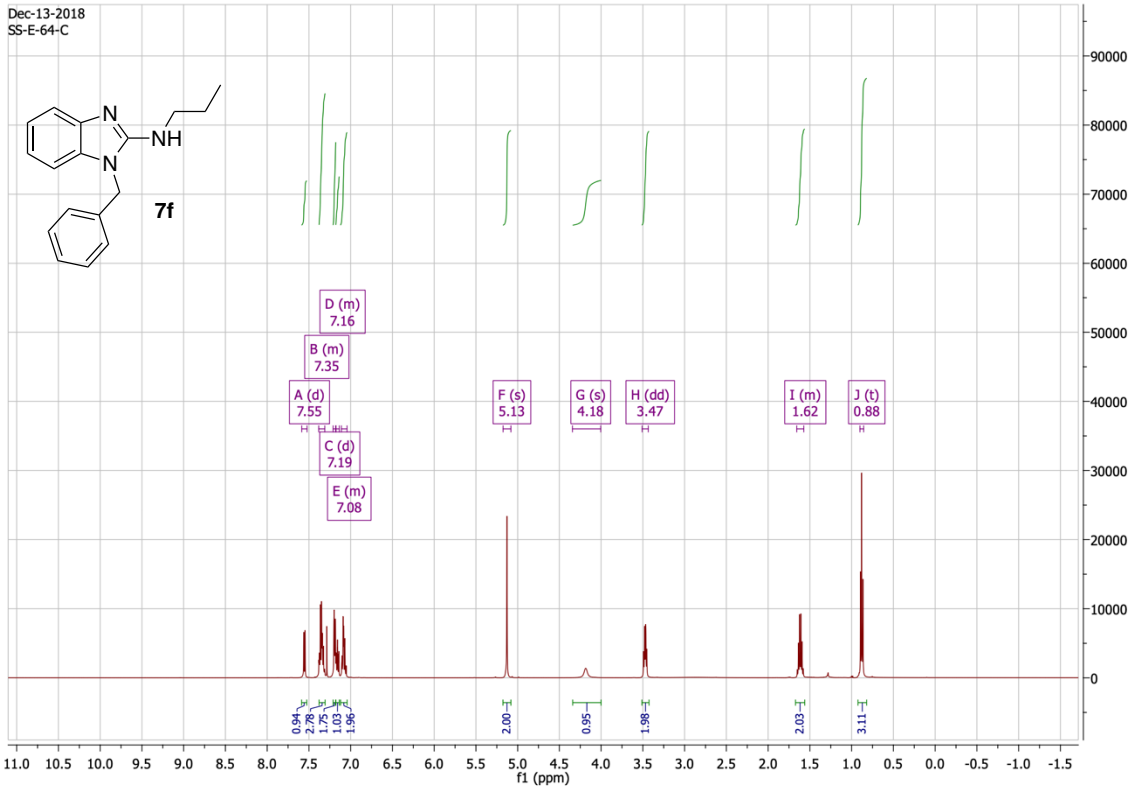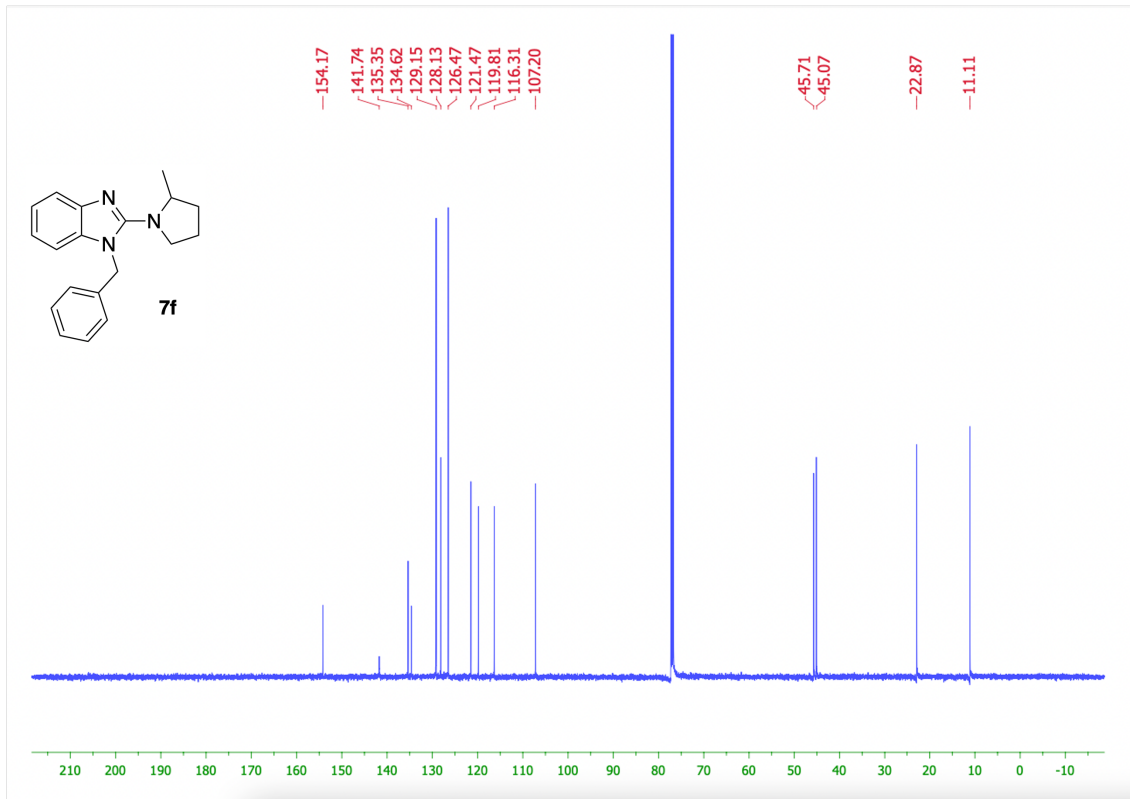

Mar23-2020-CHlab  
SS-E-60-C

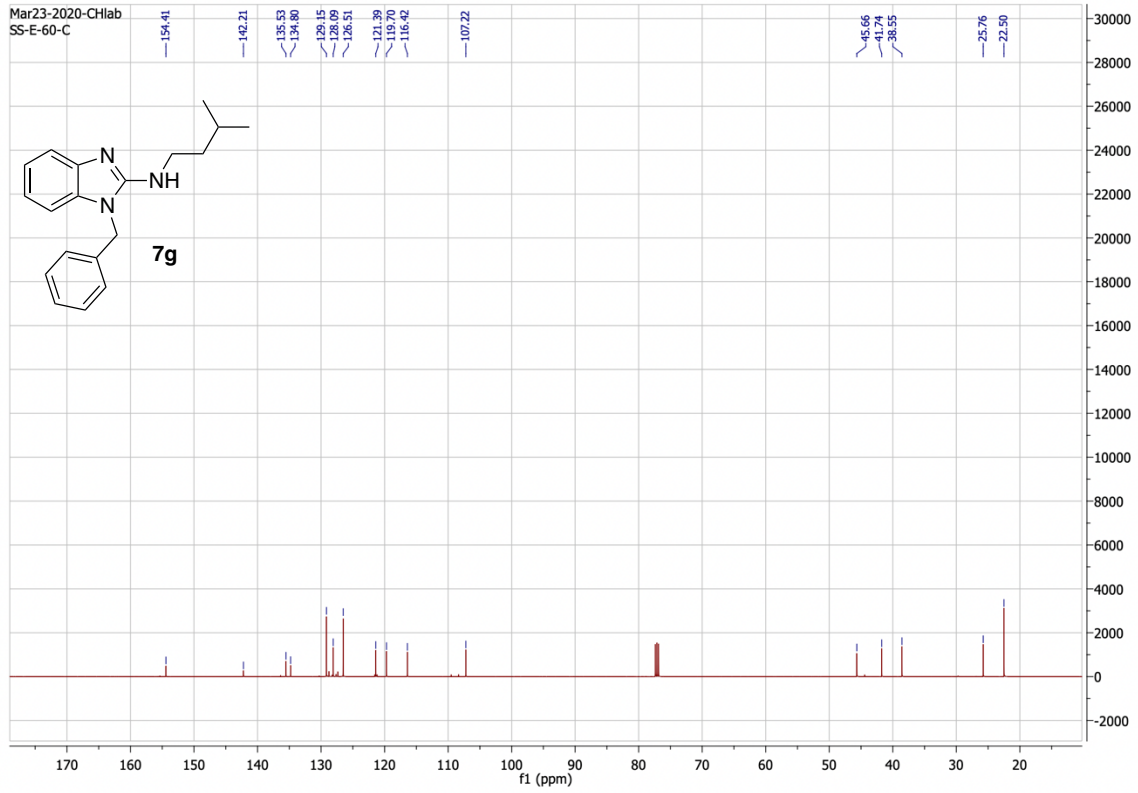

Mar23-2020-CHlab  
SS-E-60-C

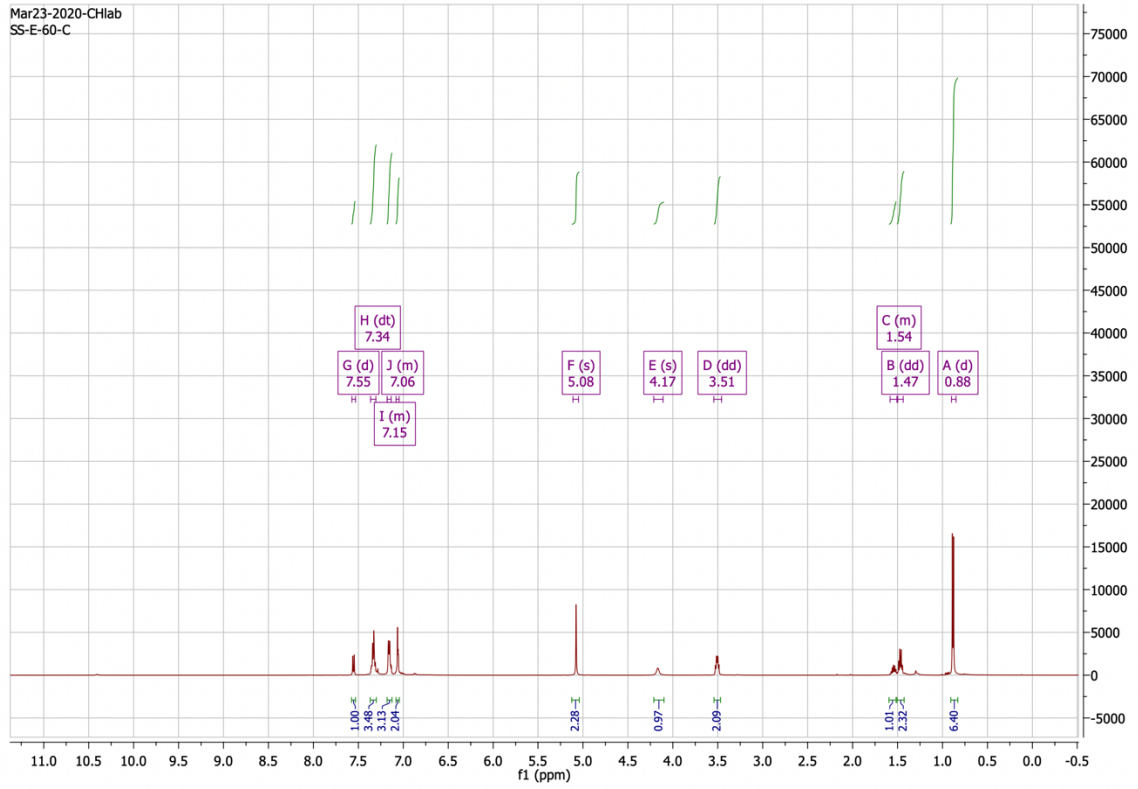

Mar20-2020-CHlab  
SS-E-19

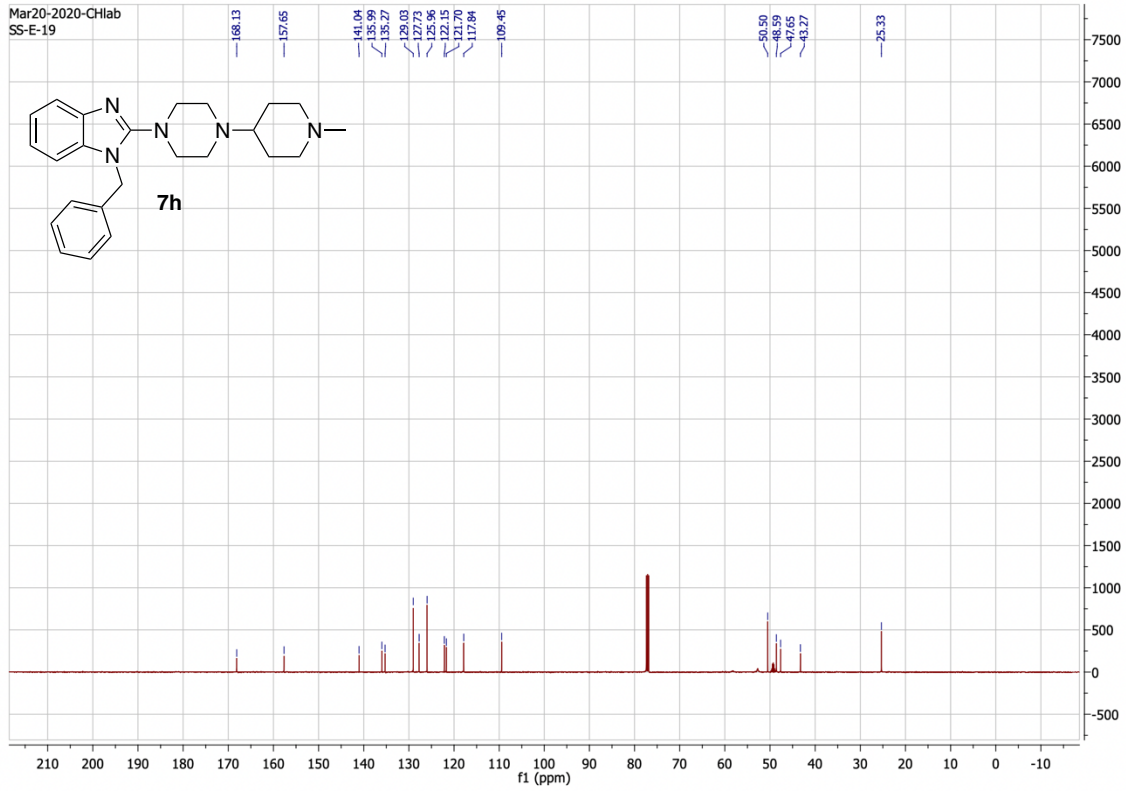

Mar20-2020-CHlab  
SS-E-19

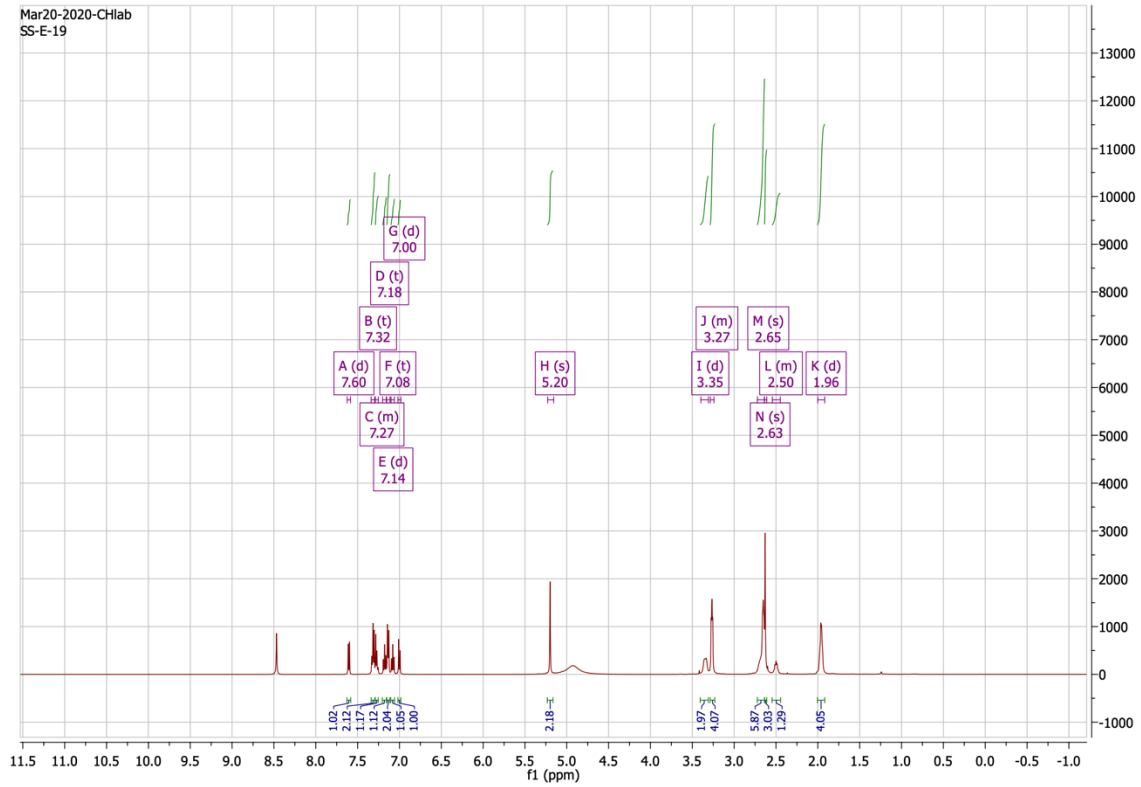

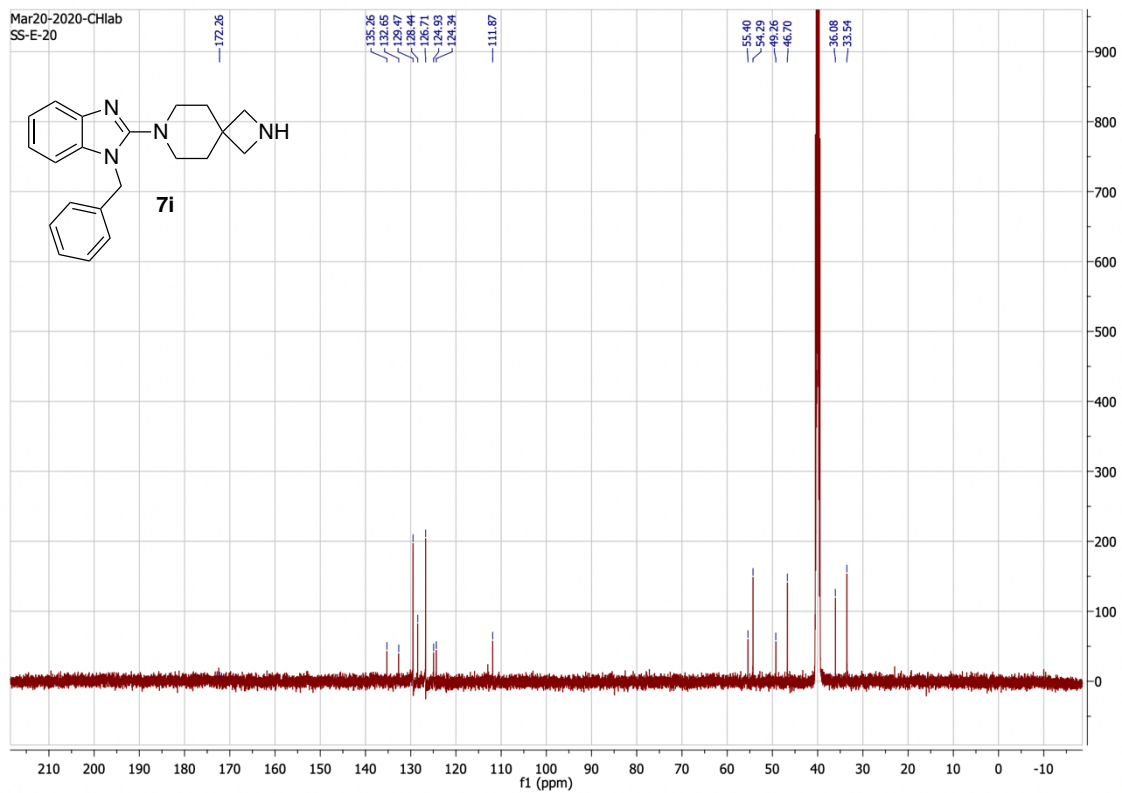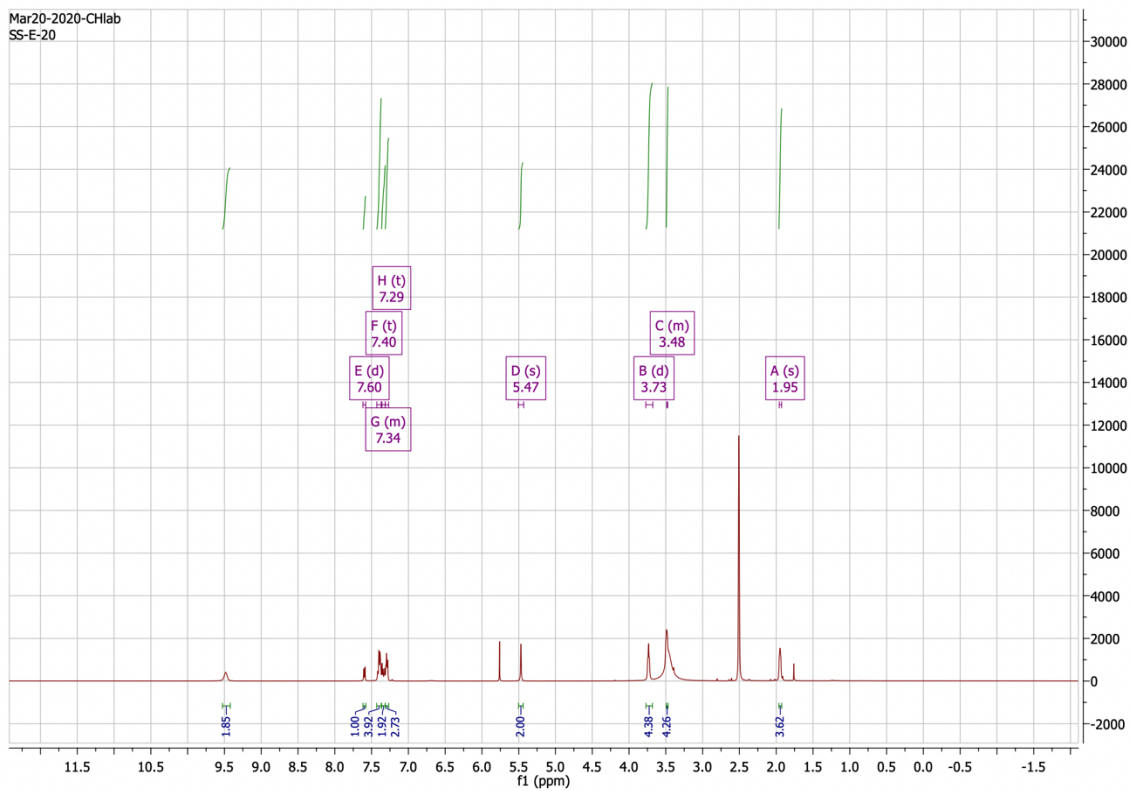

Mar18-2020-CHlab  
SS-E-86-A

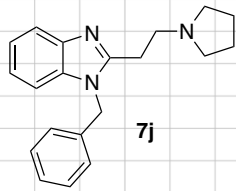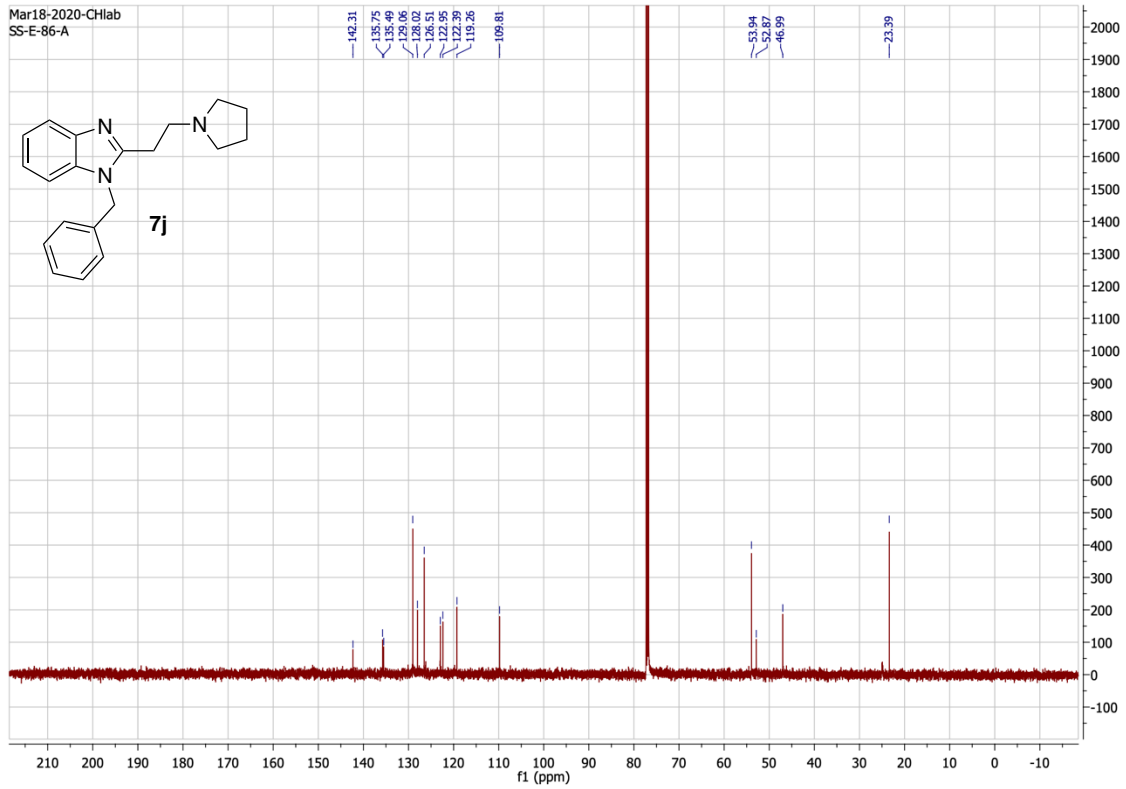

Jul20-2019-CHlab  
SS-E-86-A

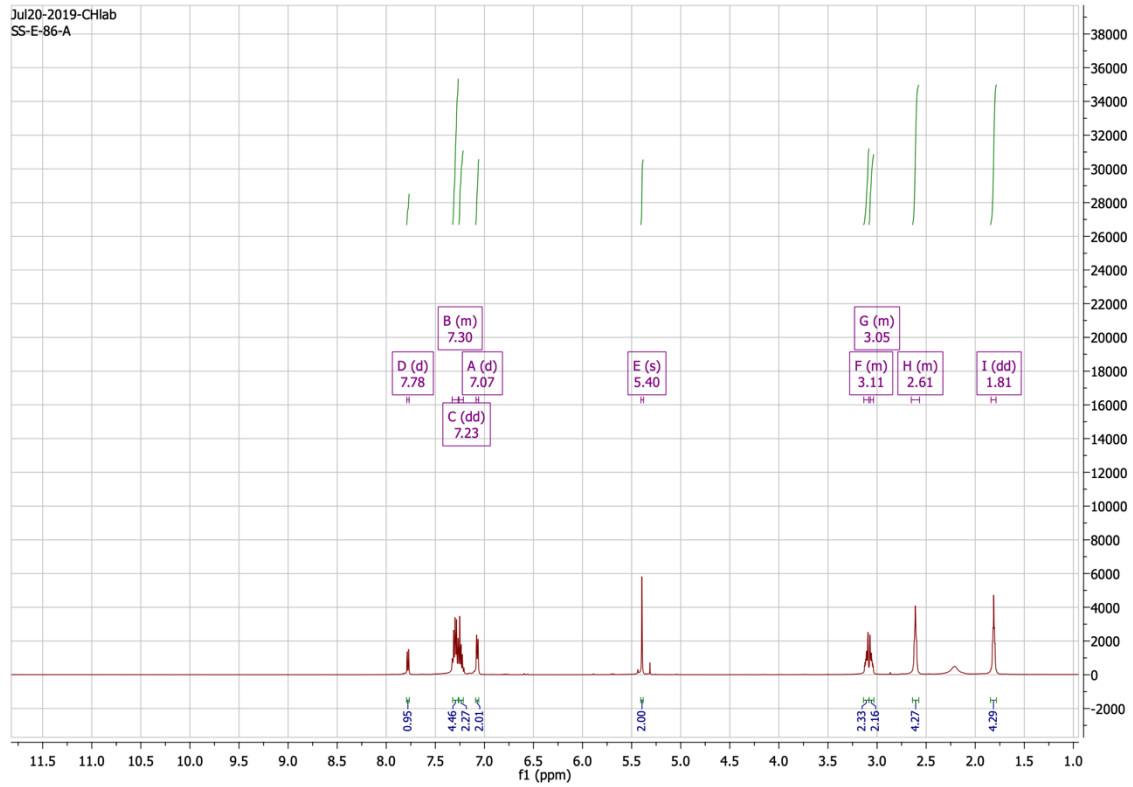

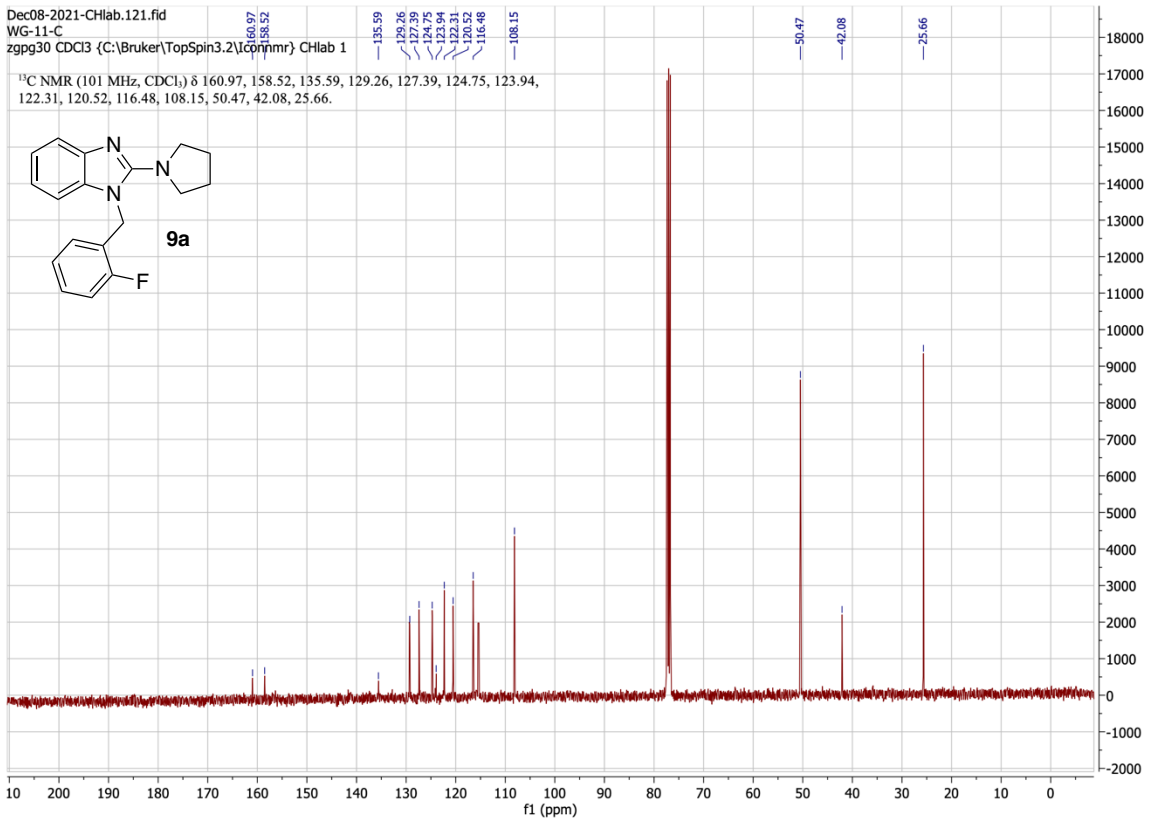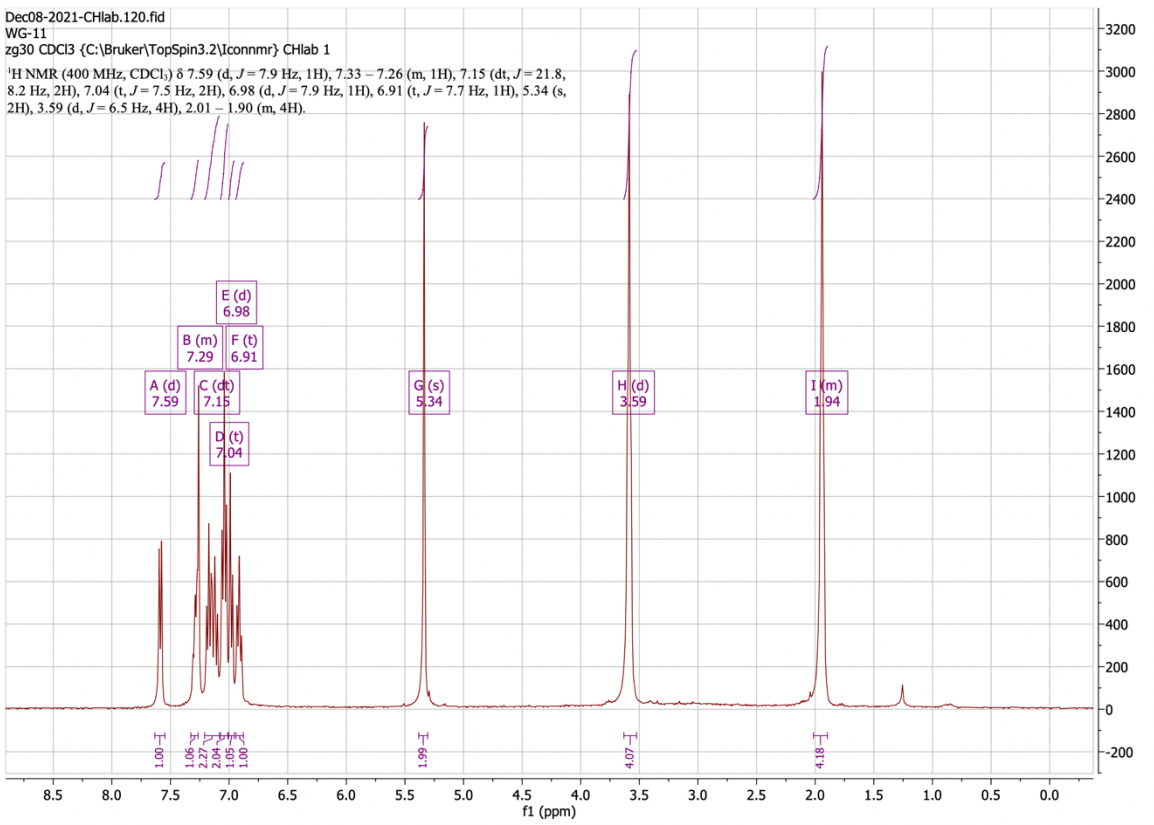



Dec08-2021-CHlab.101.fid

WG-8-C

zgpg30 CDCl3 {C:\Bruker\TopSpin3.2\iconnmr} CHlab 23

<sup>13</sup>C NMR (101 MHz, CDCl<sub>3</sub>) δ 164.49, 162.03, 139.44, 135.64, 130.61, 122.28, 121.36, 120.50, 116.56, 114.78, 113.04, 112.82, 108.20, 50.65, 47.44, 25.65.

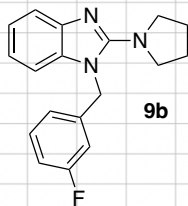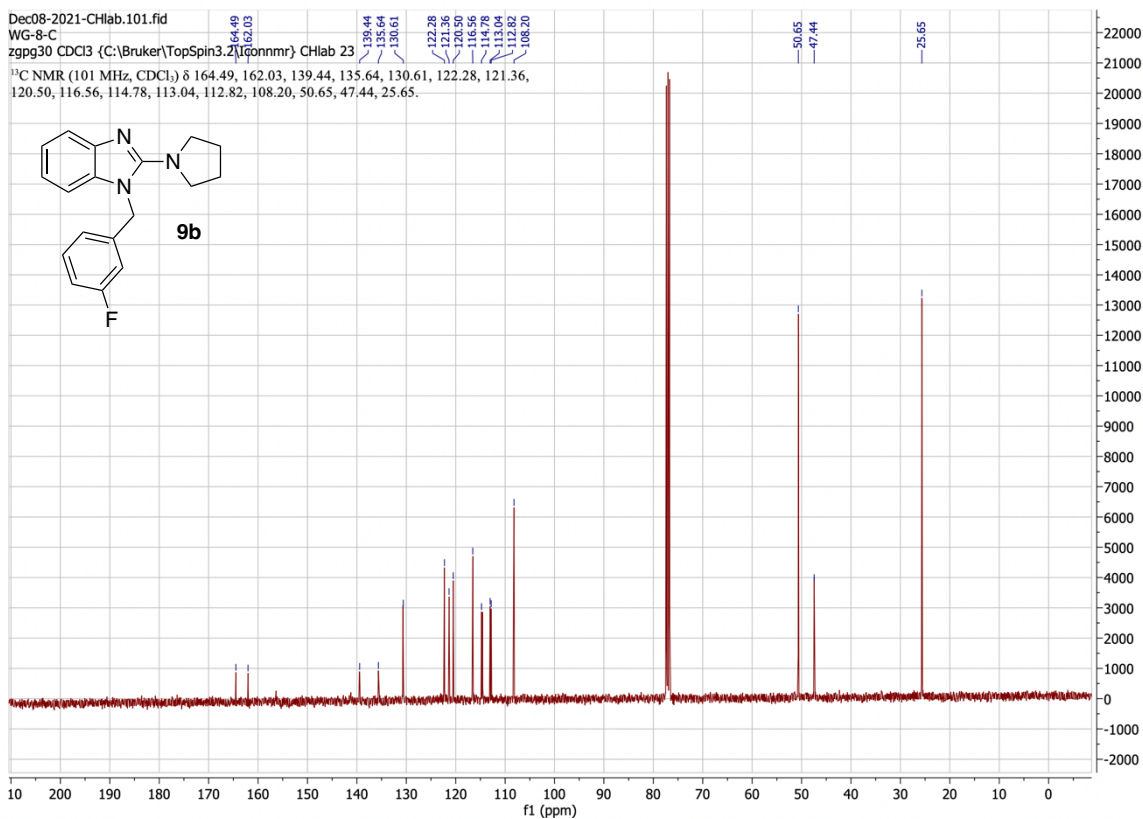

Dec08-2021-CHlab.100.fid

WG-8

zg30 CDCl3 {C:\Bruker\TopSpin3.2\iconnmr} CHlab 23

<sup>1</sup>H NMR (400 MHz, CDCl<sub>3</sub>) δ 7.58 (d, *J* = 7.9 Hz, 1H), 7.30 (td, *J* = 8.0, 5.8 Hz, 1H), 7.17 (td, *J* = 7.7, 1.2 Hz, 1H), 7.06 – 7.01 (m, 1H), 7.01 – 6.91 (m, 3H), 6.87 (dt, *J* = 9.7, 2.2 Hz, 1H), 5.27 (s, 2H), 3.61 – 3.53 (m, 4H), 1.99 – 1.90 (m, 4H).

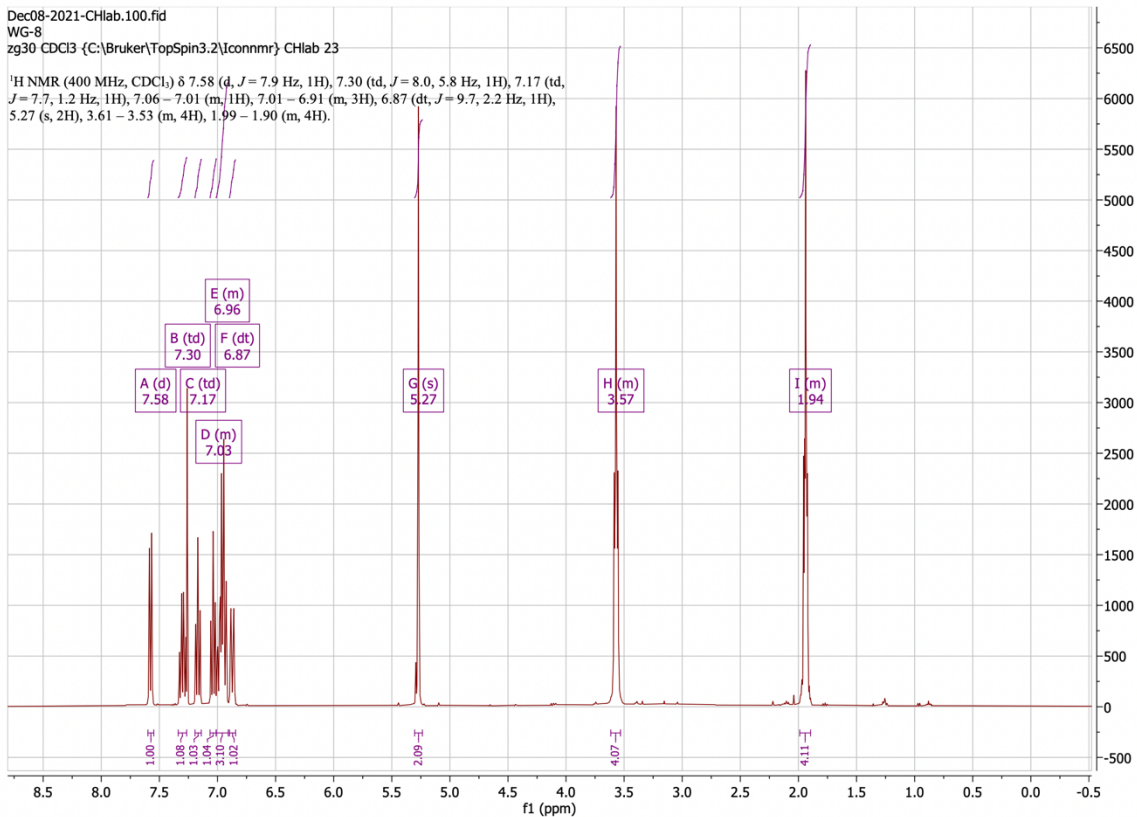

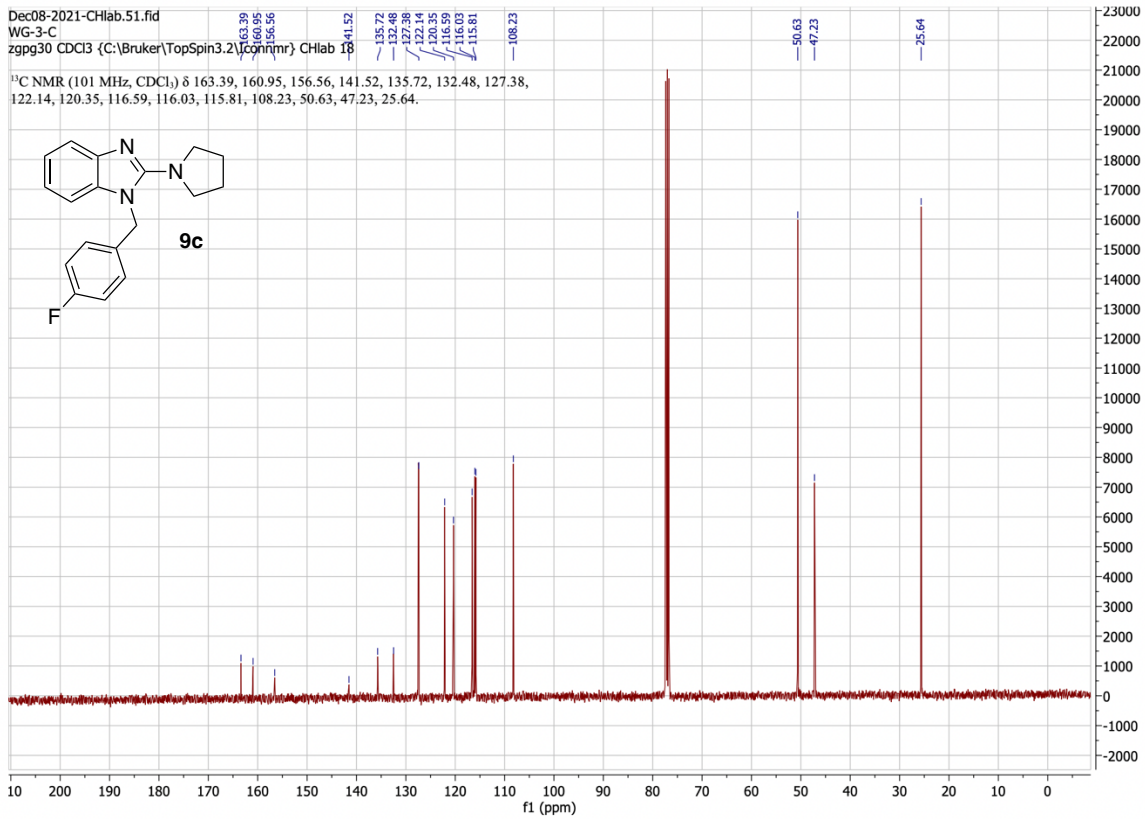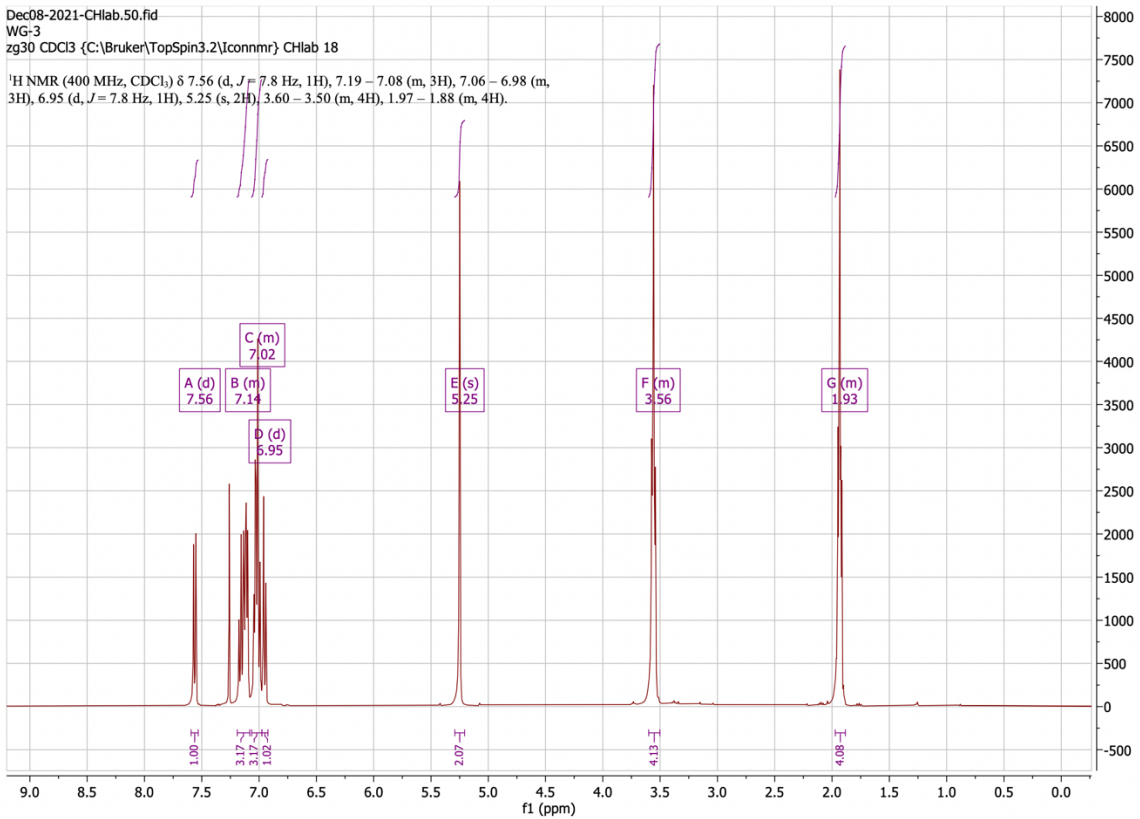

Dec08-2021-CHlab.41.fid

WG-2-C

zgpg30 CDCl3 {C:\Bruker\TopSpin3.2\iconnmr} CHlab 17

<sup>13</sup>C NMR (101 MHz, CDCl<sub>3</sub>) δ 156.83, 141.91, 139.08, 135.86, 135.86, 135.86, 130.29, 127.88, 125.96, 123.93, 122.14, 120.33, 116.70, 108.15, 50.63, 47.37, 25.65.

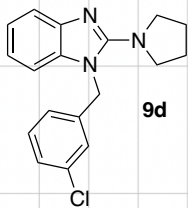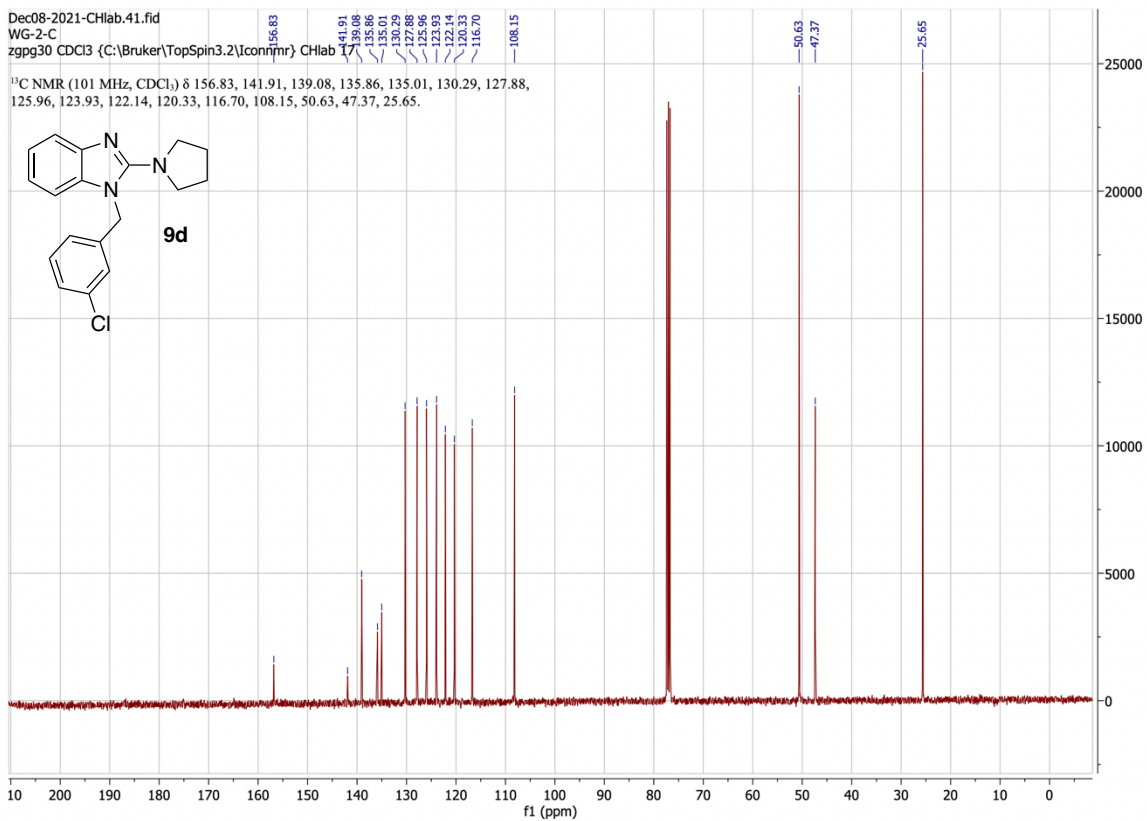

Dec08-2021-CHlab.40.fid

WG-2

zg30 CDCl3 {C:\Bruker\TopSpin3.2\iconnmr} CHlab 17

<sup>1</sup>H NMR (400 MHz, CDCl<sub>3</sub>) δ 7.55 (d, *J* = 7.9 Hz, 1H), 7.25 (d, *J* = 5.6 Hz, 2H), 7.20 – 7.12 (m, 2H), 7.06 – 6.98 (m, 2H), 6.94 (d, *J* = 7.8 Hz, 1H), 5.24 (s, 2H), 3.58 – 3.49 (m, 4H), 1.99 – 1.86 (m, 4H).

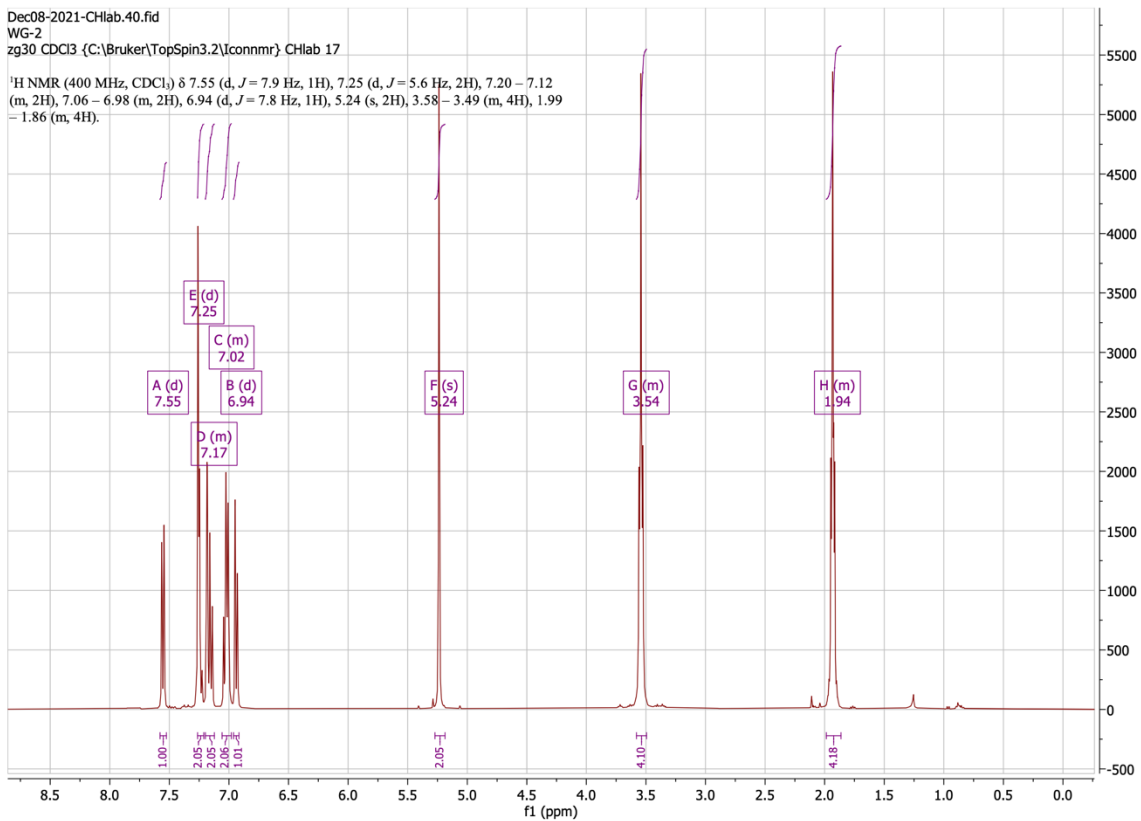

Dec08-2021-CHlab.91.fid

WG-7-C

zgpg30 CDCl3 {C:\Bruker\TopSpin3.2\Iconnmr} CHlab 22

$^{13}\text{C}$  NMR (101 MHz,  $\text{CDCl}_3$ )  $\delta$  156.63, 141.64, 135.74, 135.37, 133.46, 129.16, 127.16, 122.17, 120.35, 116.64, 108.17, 50.63, 47.28, 25.64.

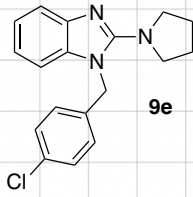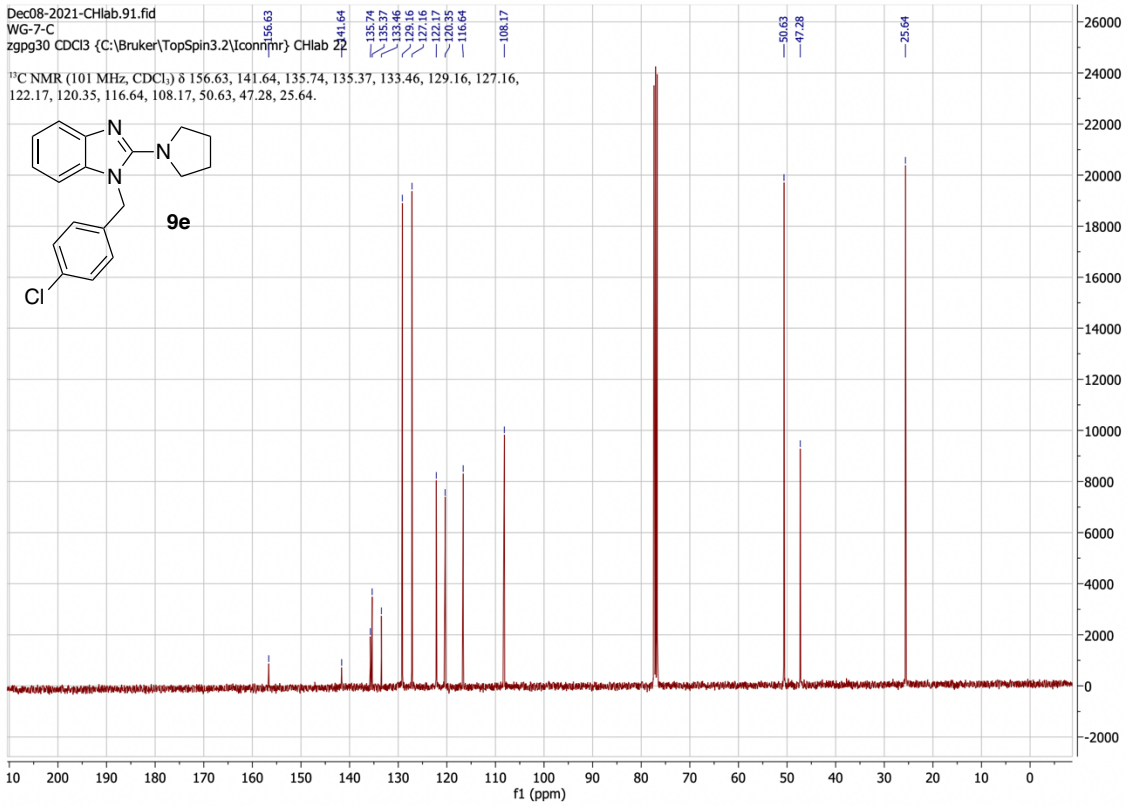

Dec08-2021-CHlab.90.fid

WG-7

zg30 CDCl3 {C:\Bruker\TopSpin3.2\Iconnmr} CHlab 22

$^1\text{H}$  NMR (400 MHz,  $\text{CDCl}_3$ )  $\delta$  7.56 (d,  $J = 7.9$  Hz, 1H), 7.32 – 7.28 (m, 2H), 7.16 (td,  $J = 7.6$ , 1.2 Hz, 1H), 7.08 (d,  $J = 8.2$  Hz, 2H), 7.02 (td,  $J = 7.6$ , 1.1 Hz, 1H), 6.93 (d,  $J = 7.9$  Hz, 1H), 5.24 (s, 2H), 3.59 – 3.49 (m, 4H), 1.97 – 1.89 (m, 4H).

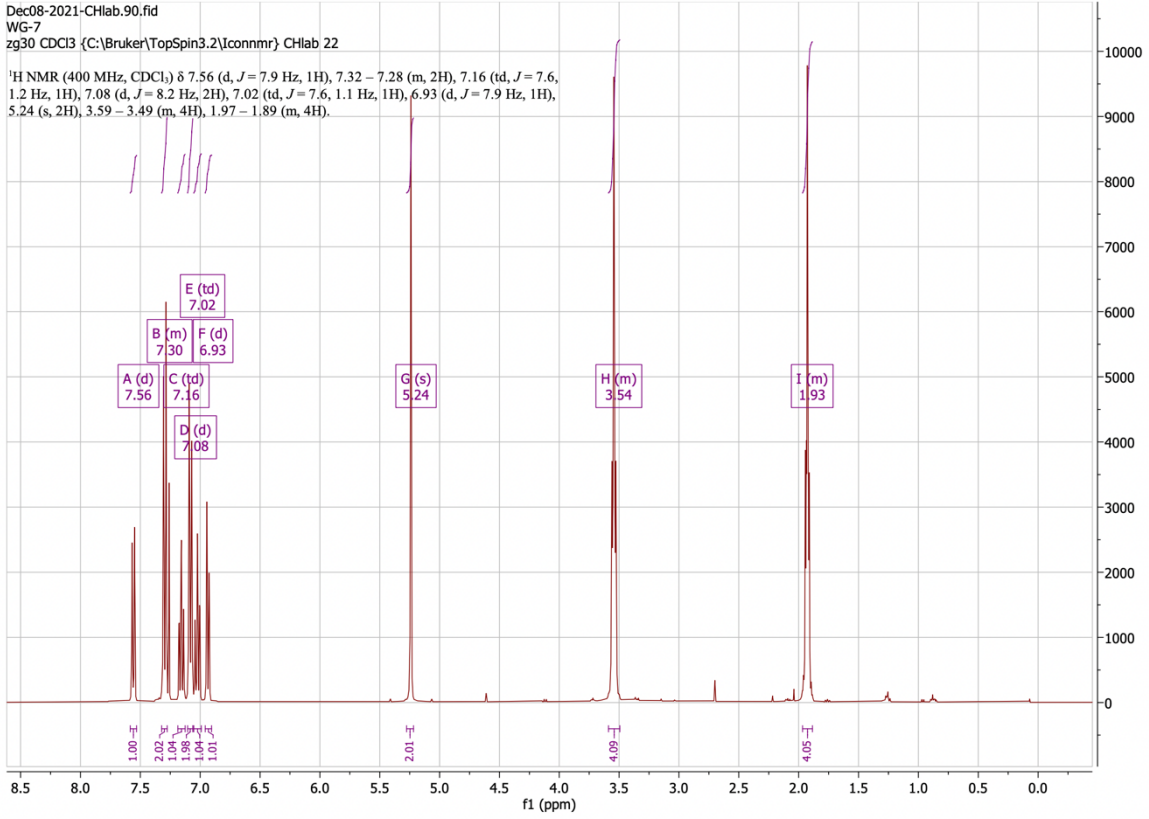

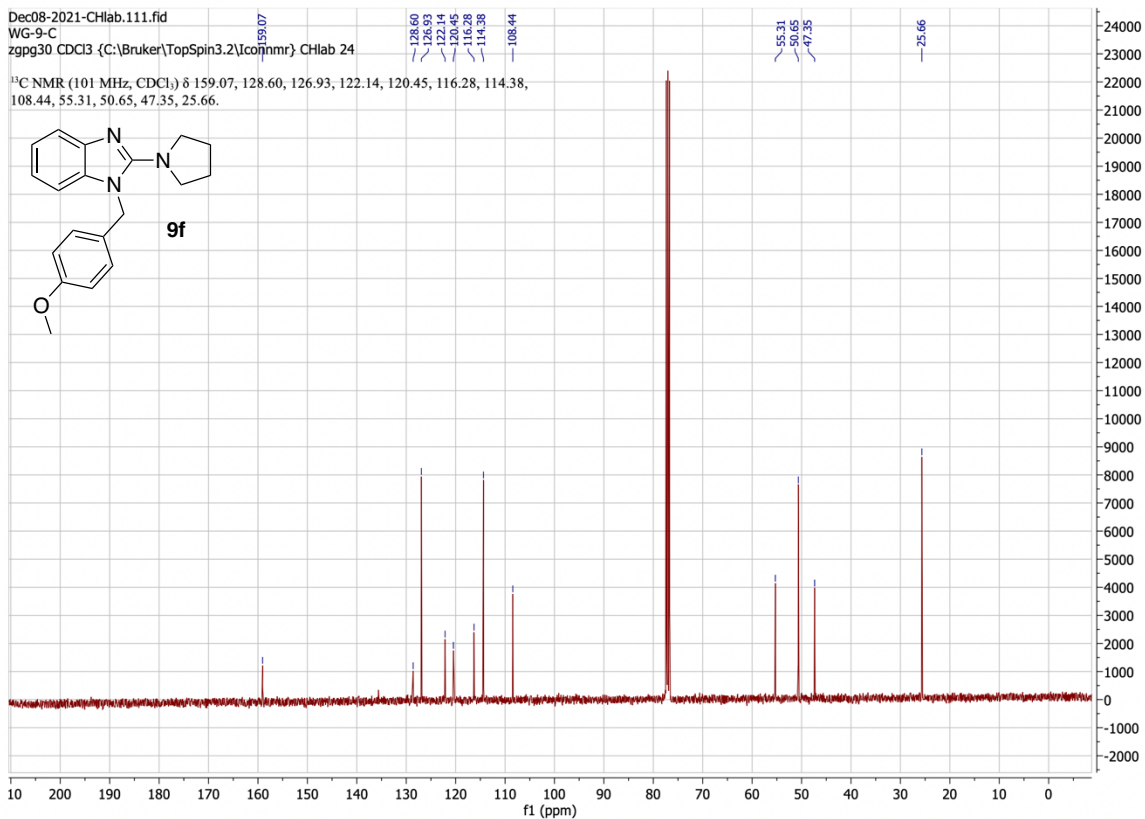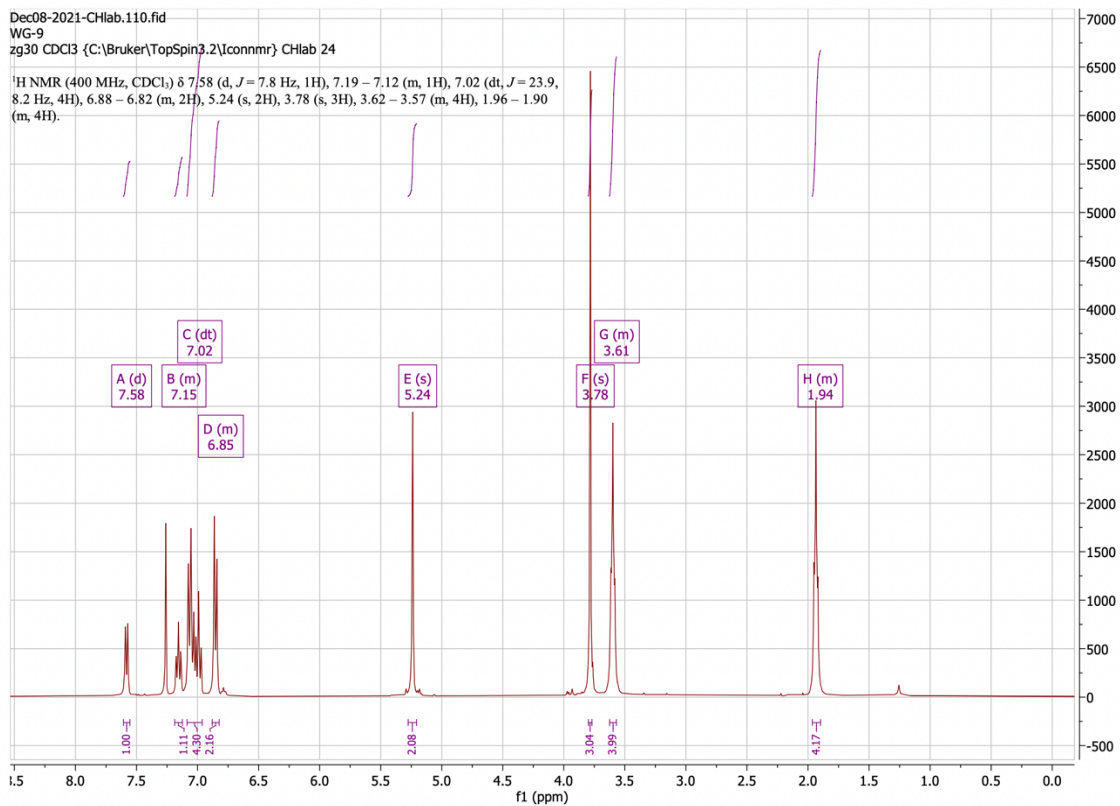

Dec08-2021-CHlab.61.fid

WG-4-C

zgpg30 CDCl3 {C:\Bruker\TopSpin3.2\Iconmmr\CHlab\19

<sup>13</sup>C NMR (101 MHz, CDCl<sub>3</sub>) δ 156.83, 153.84, 151.38, 146.97, 141.96, 135.88, 129.81, 122.01, 121.50, 120.21, 116.66, 113.78, 108.19, 56.32, 50.58, 46.97, 25.64.

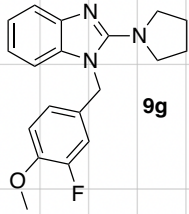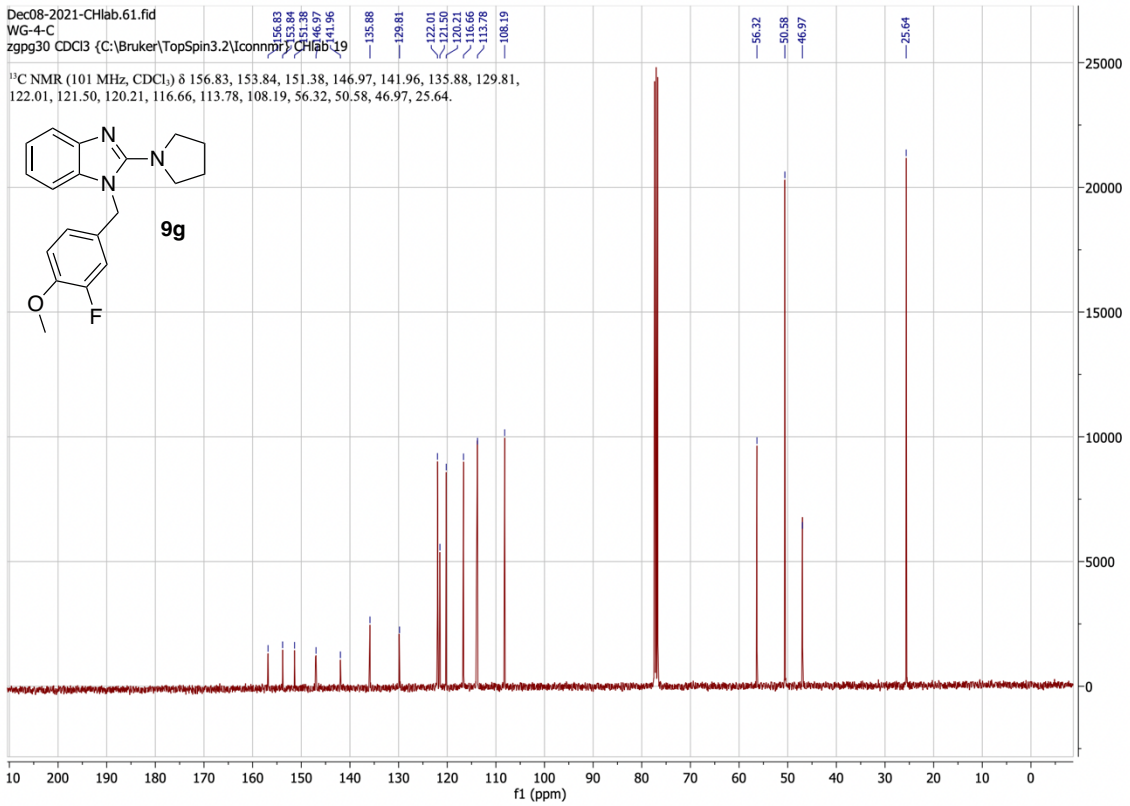

Dec08-2021-CHlab.60.fid

WG-4

zg30 CDCl3 {C:\Bruker\TopSpin3.2\Iconmmr\CHlab\19

<sup>1</sup>H NMR (400 MHz, CDCl<sub>3</sub>) δ 7.54 (d, *J* = 7.9 Hz, 1H), 7.15 (td, *J* = 7.6, 1.3 Hz, 1H), 7.02 (td, *J* = 7.6, 1.1 Hz, 1H), 6.97 – 6.79 (m, 4H), 5.19 (s, 2H), 3.86 (s, 3H), 3.59 – 3.51 (m, 4H), 1.97 – 1.89 (m, 4H).

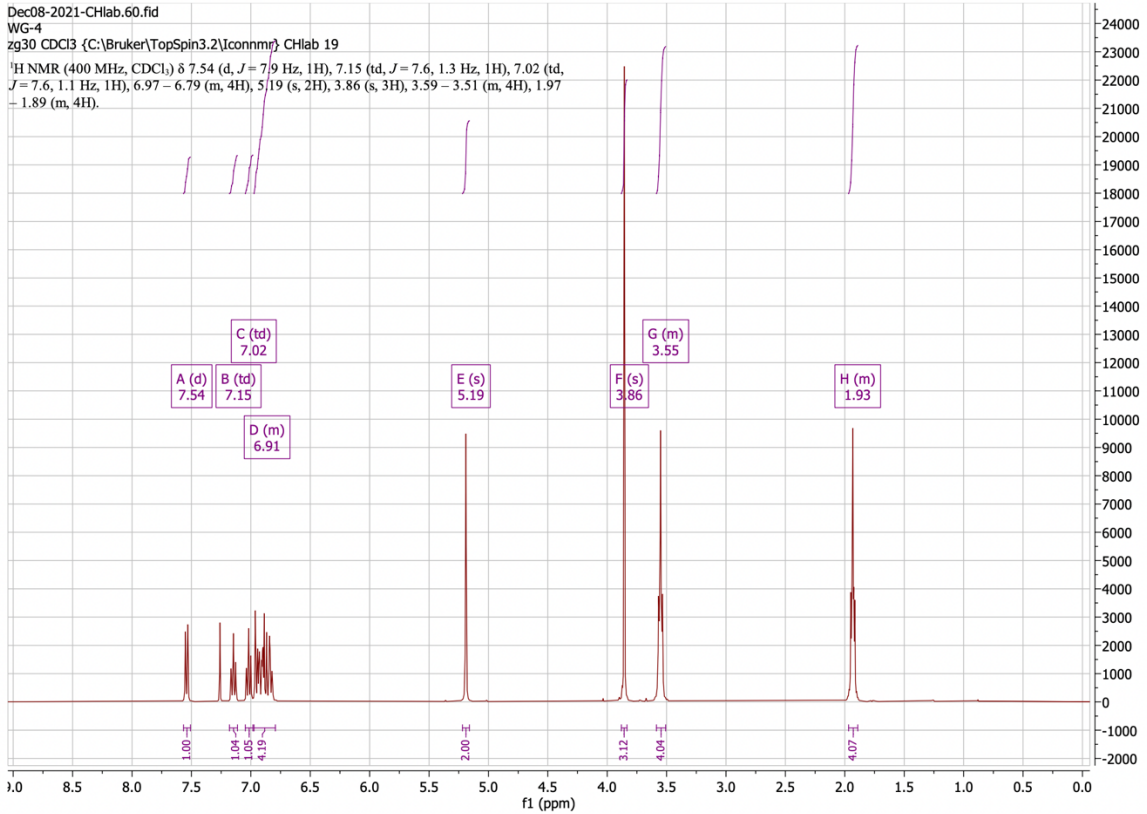

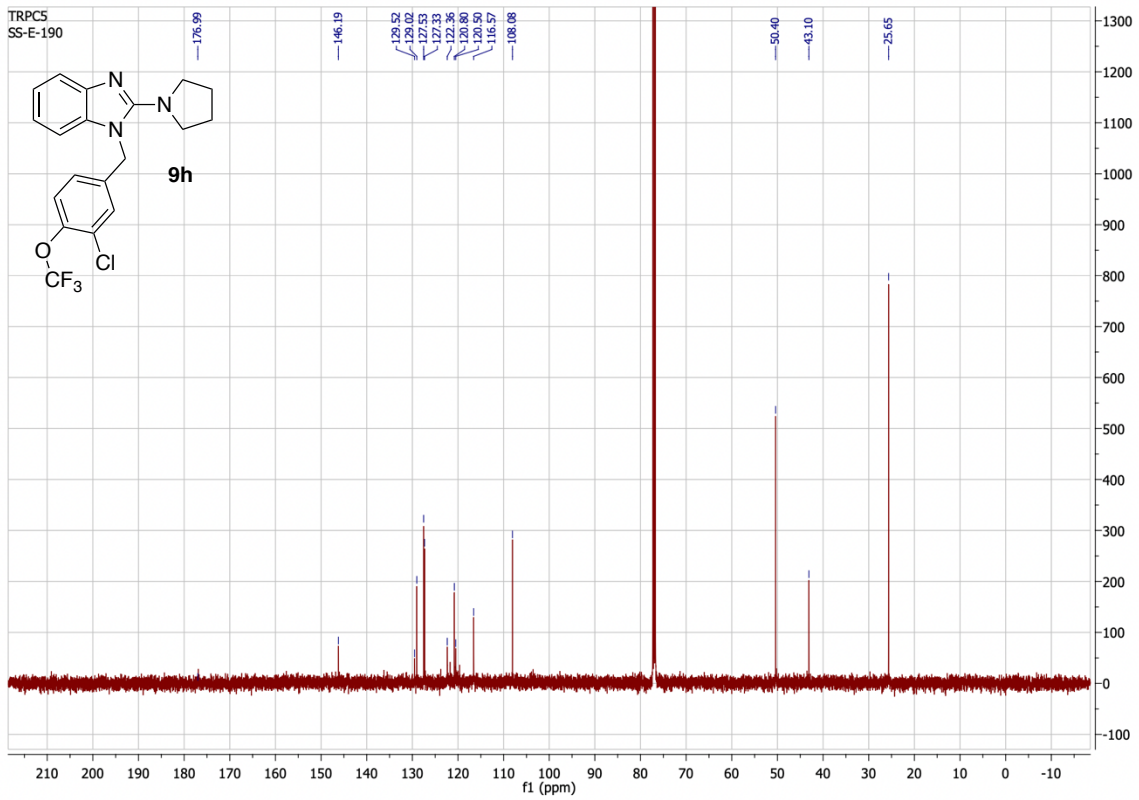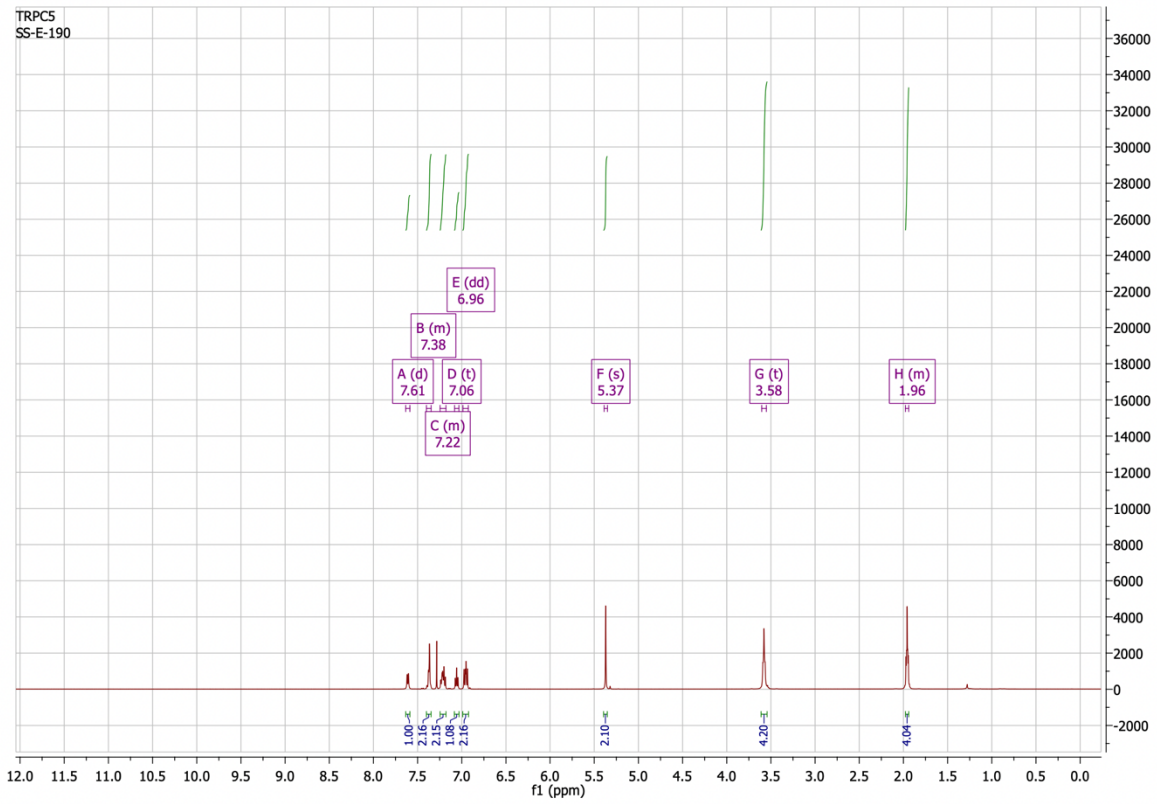

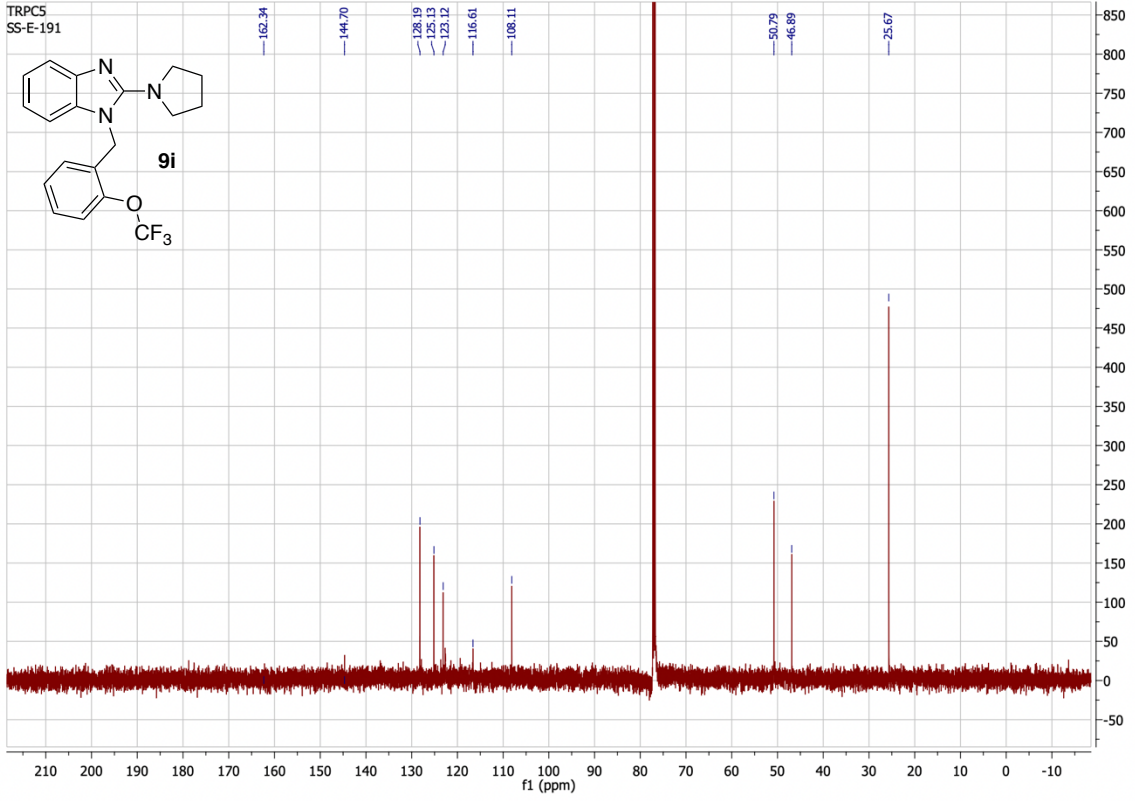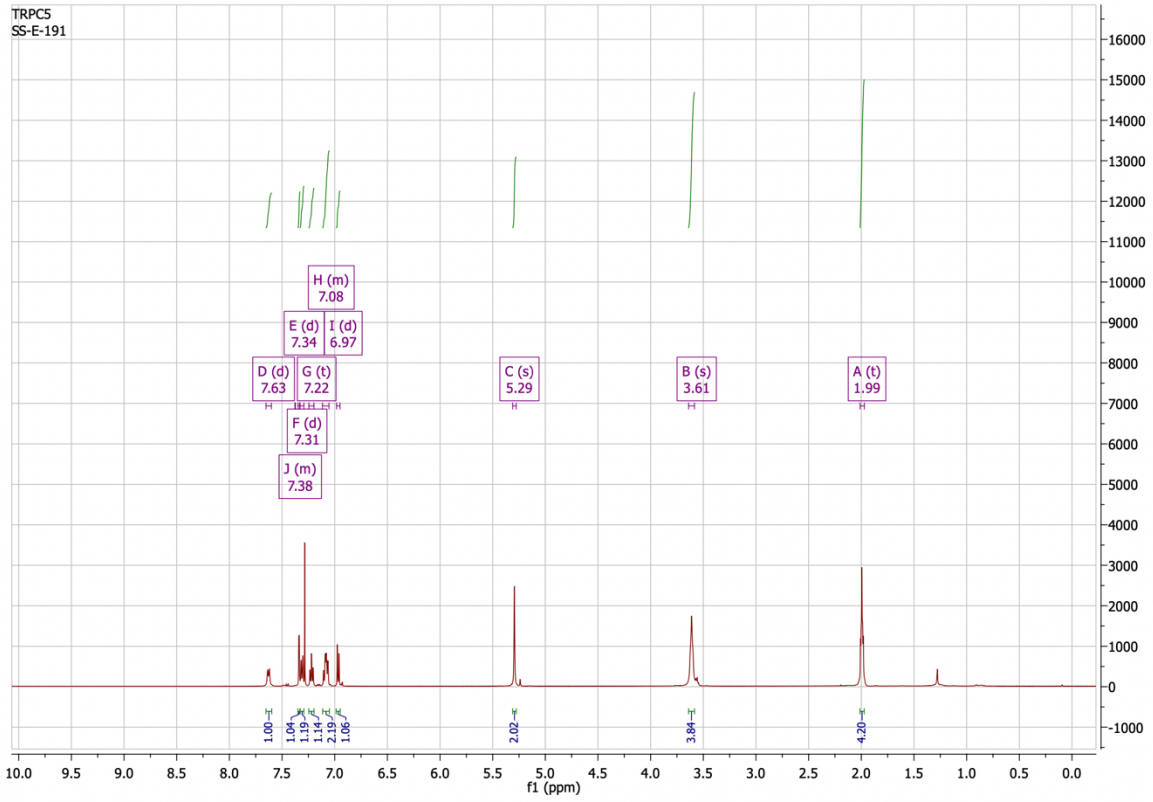



Dec07-2021-CHlab.71.fid  
 JH-111-C  
 zgpg30 CDCl3 {C:\Bruker\TopSpin3.2\Iconnmr} CHlab 18  
<sup>13</sup>C NMR (101 MHz, CDCl<sub>3</sub>) δ 156.88, 142.09, 135.87, 135.44, 132.65, 127.60, 126.82, 126.37, 122.22, 120.28, 116.72, 108.00, 50.31, 44.80, 25.62.

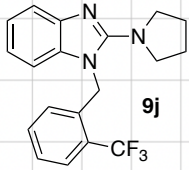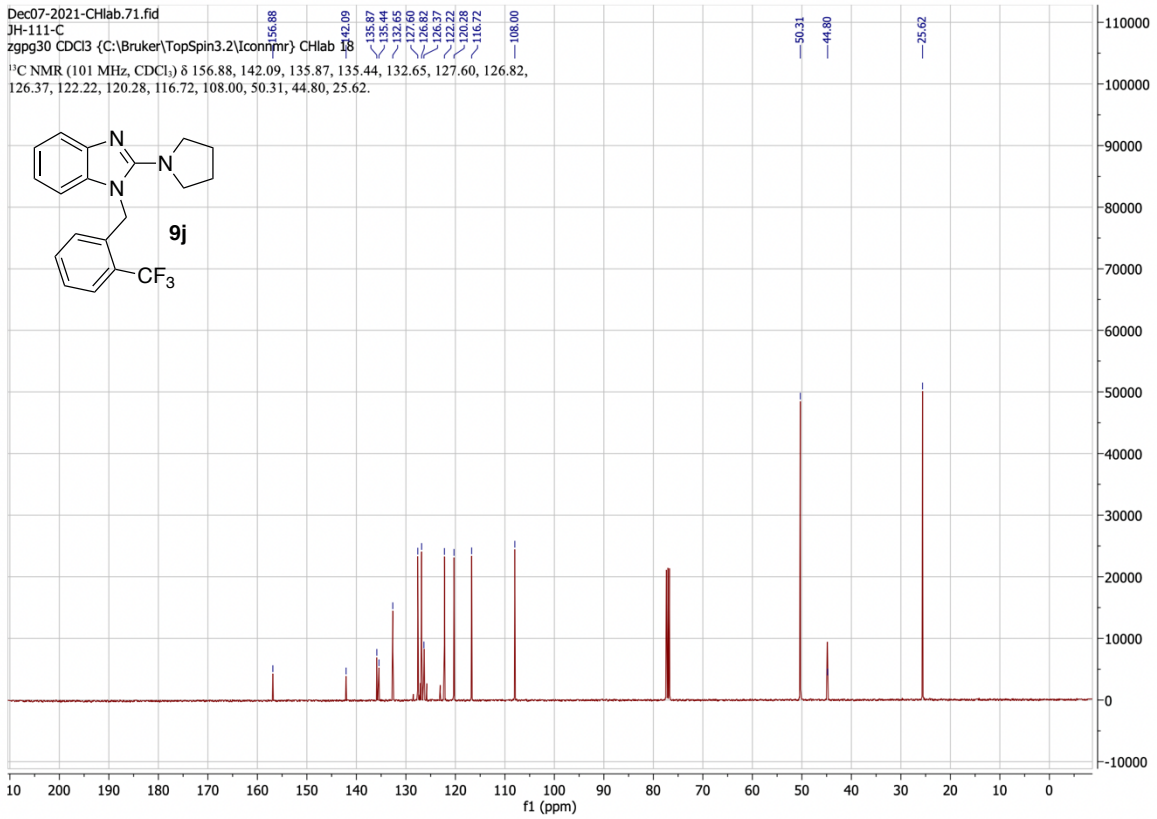

Dec07-2021-CHlab.70.fid  
 JH-111  
 zg30 CDCl3 {C:\Bruker\TopSpin3.2\Iconnmr} CHlab 18  
<sup>1</sup>H NMR (400 MHz, CDCl<sub>3</sub>) δ 7.74 (dd, *J* = 7.0, 2.0 Hz, 1H), 7.56 (d, *J* = 7.9 Hz, 1H), 7.46 – 7.35 (m, 2H), 7.16 (td, *J* = 7.6, 1.2 Hz, 1H), 7.01 (td, *J* = 7.6, 1.1 Hz, 2H), 6.89 (d, *J* = 7.8 Hz, 1H), 5.46 (s, 2H), 3.56 – 3.47 (m, 4H), 1.96 – 1.85 (m, 4H).

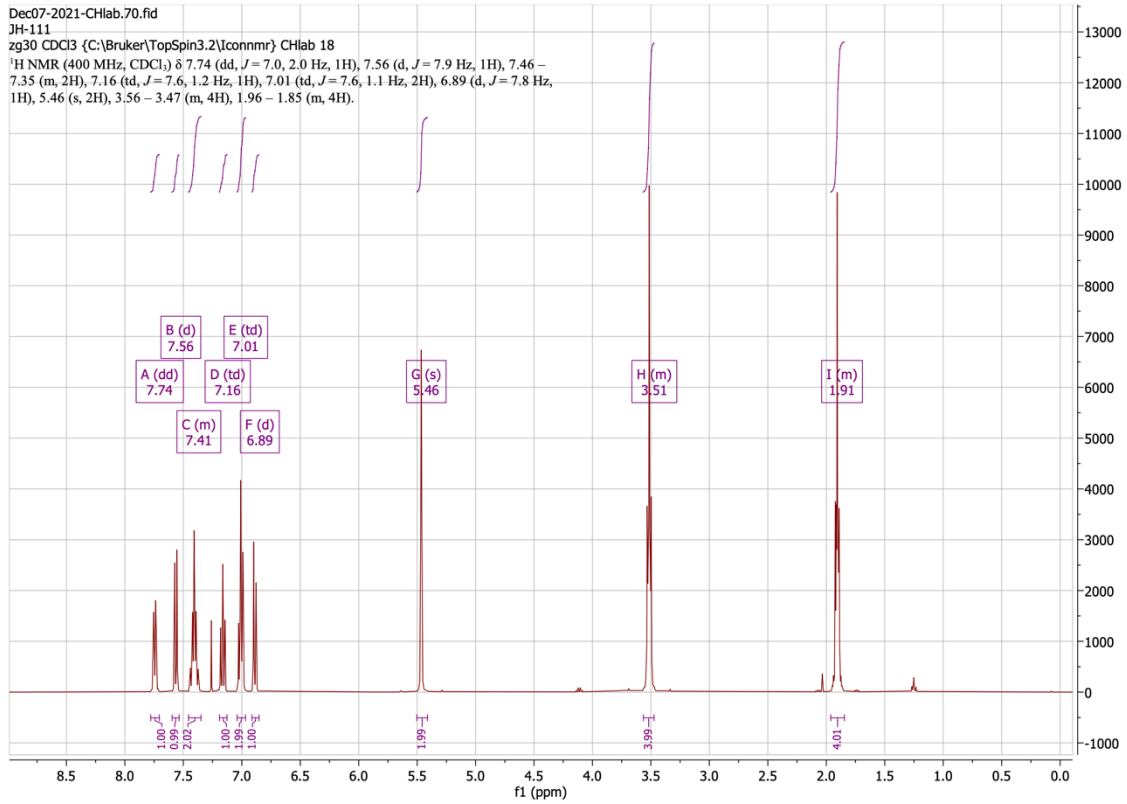

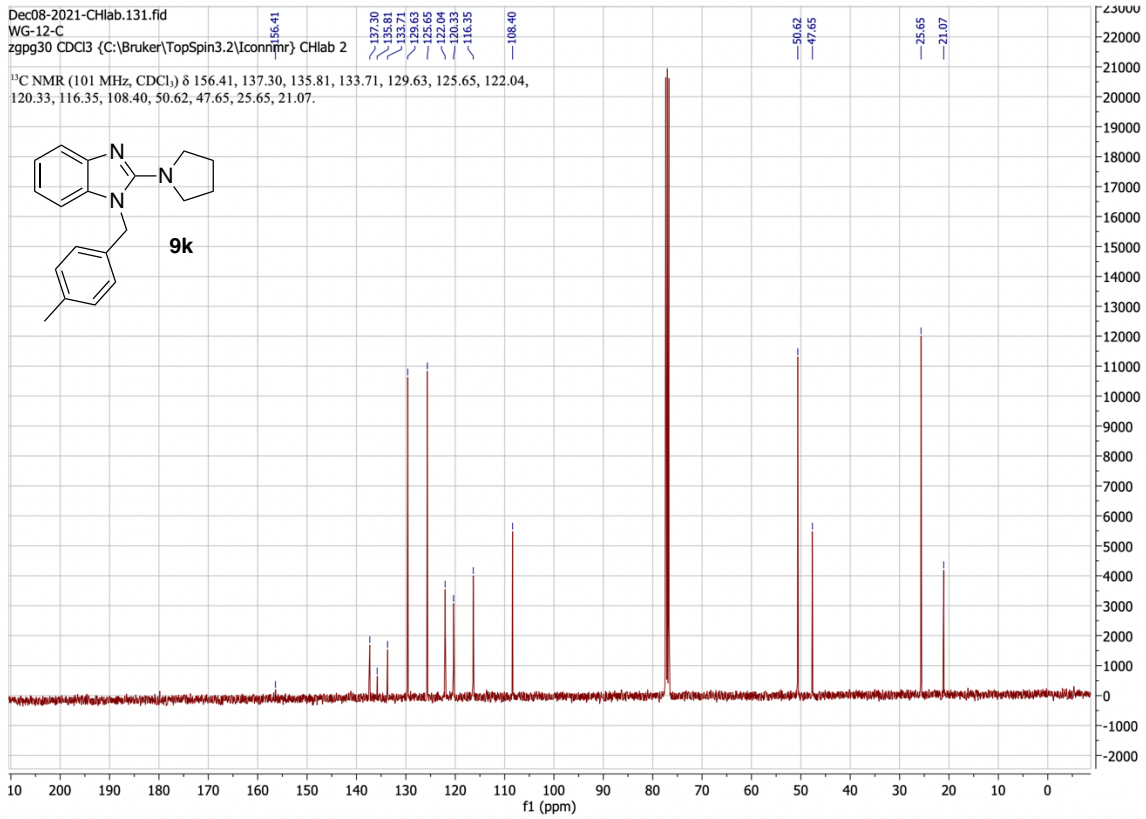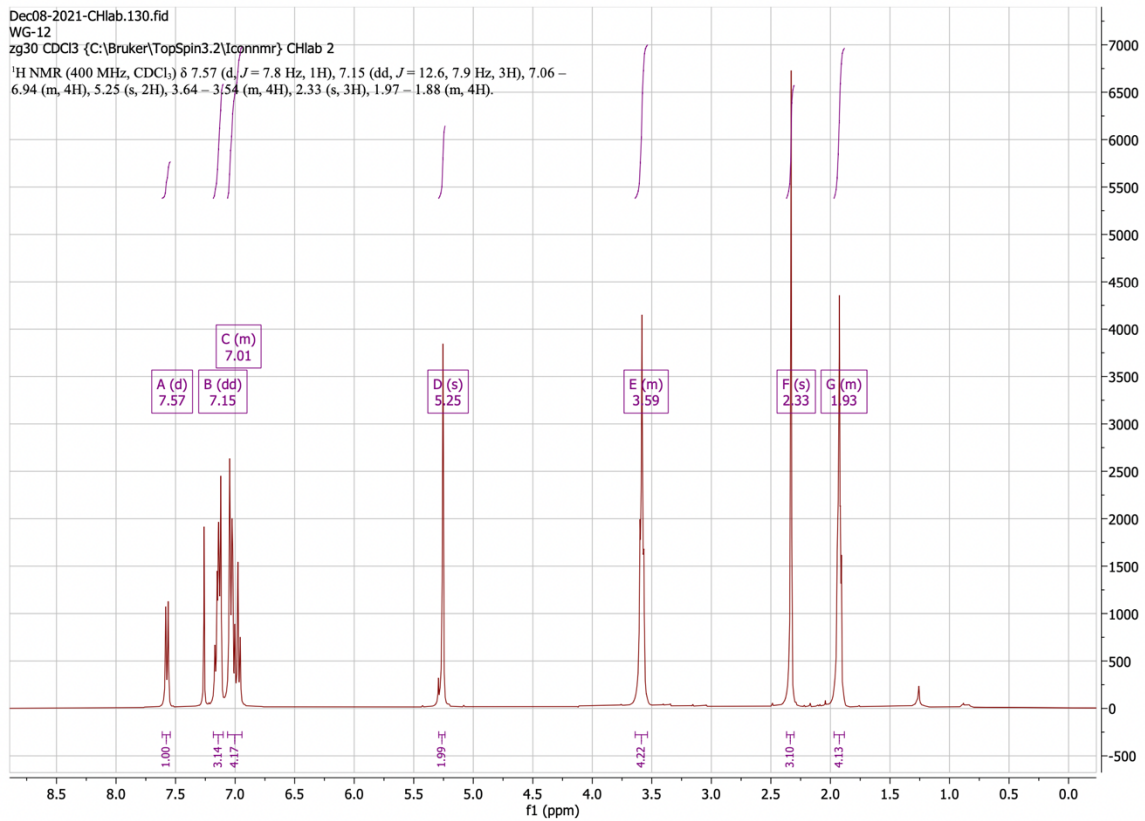

Dec08-2021-CHlab.31.fid  
 WG-1-C  
 zgpg30 CDCl3 {C:\Bruker\TopSpin3.2\iconmr} CHlab 16  
<sup>13</sup>C NMR (101 MHz, CDCl<sub>3</sub>) δ 157.15, 142.26, 138.66, 137.01, 136.28, 128.80, 128.55, 122.84, 121.78, 120.01, 116.55, 108.33, 50.54, 47.80, 25.66, 21.48.

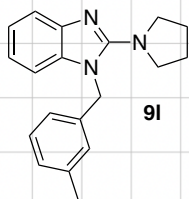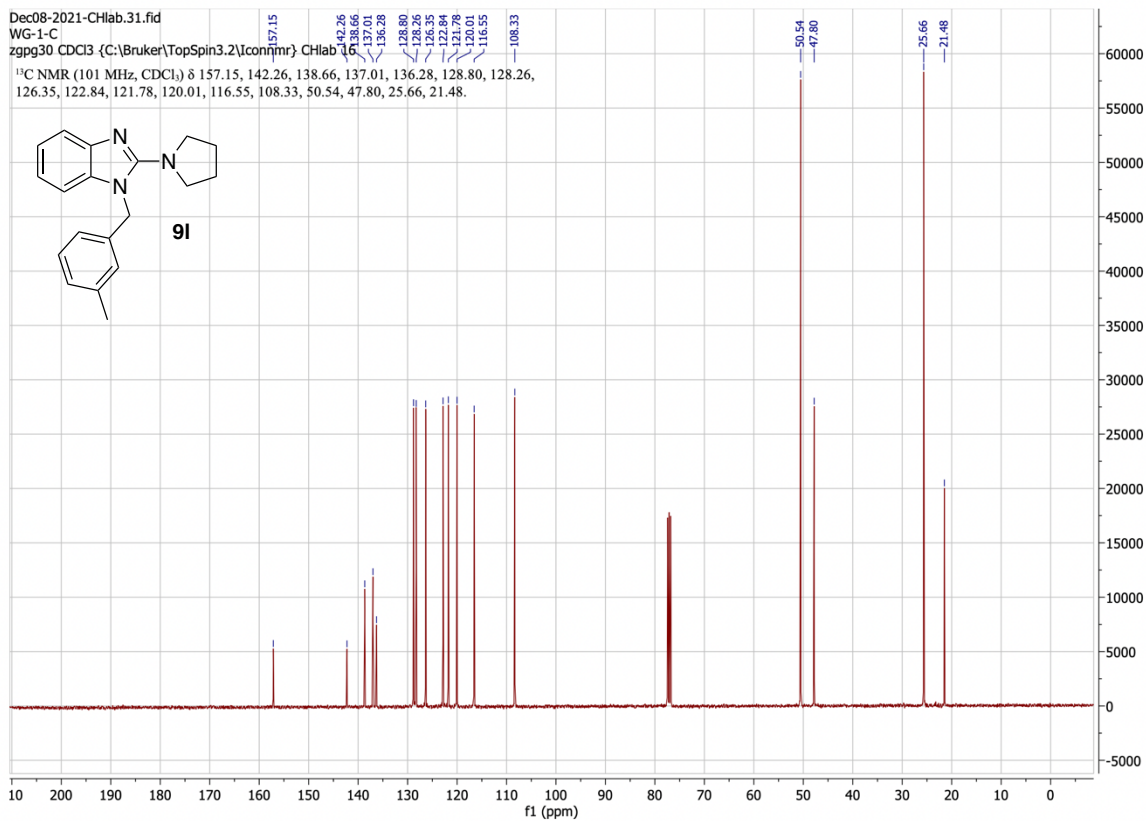

Dec08-2021-CHlab.30.fid  
 WG-1  
 zg30 CDCl3 {C:\Bruker\TopSpin3.2\iconmr} CHlab 16  
<sup>1</sup>H NMR (400 MHz, CDCl<sub>3</sub>) δ 7.55 (d, *J* = 7.8 Hz, 1H), 7.20 (t, *J* = 7.6 Hz, 1H), 7.14 (td, *J* = 7.9, 7.5, 1.4 Hz, 1H), 7.08 (d, *J* = 7.6 Hz, 1H), 7.03 – 6.92 (m, 4H), 5.23 (s, 2H), 3.60 – 3.49 (m, 4H), 2.30 (s, 3H), 1.96 – 1.86 (m, 4H).

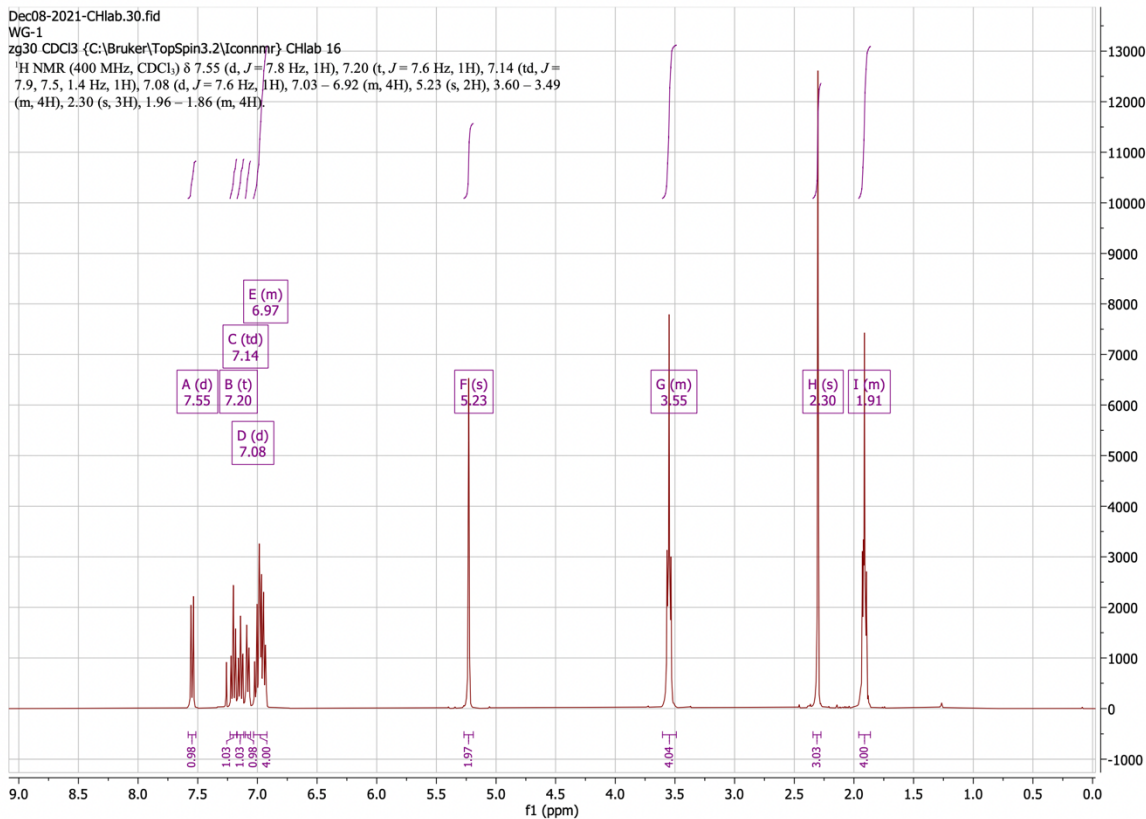

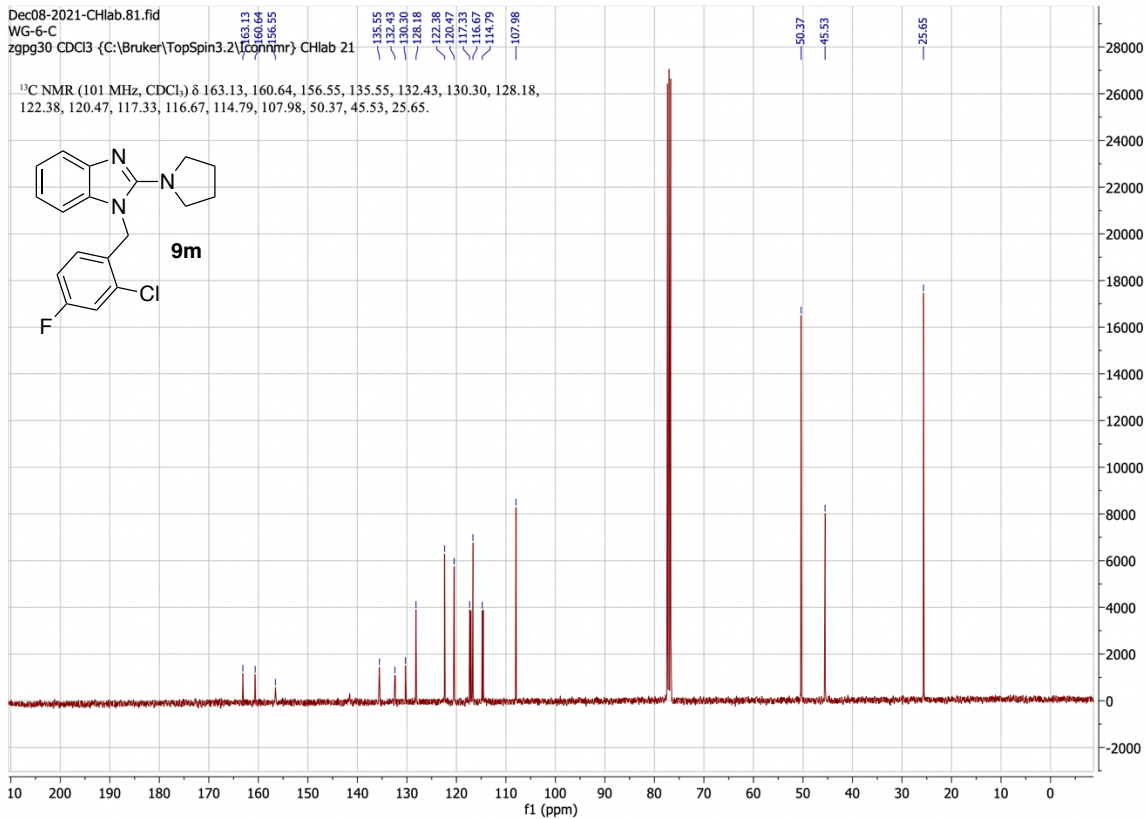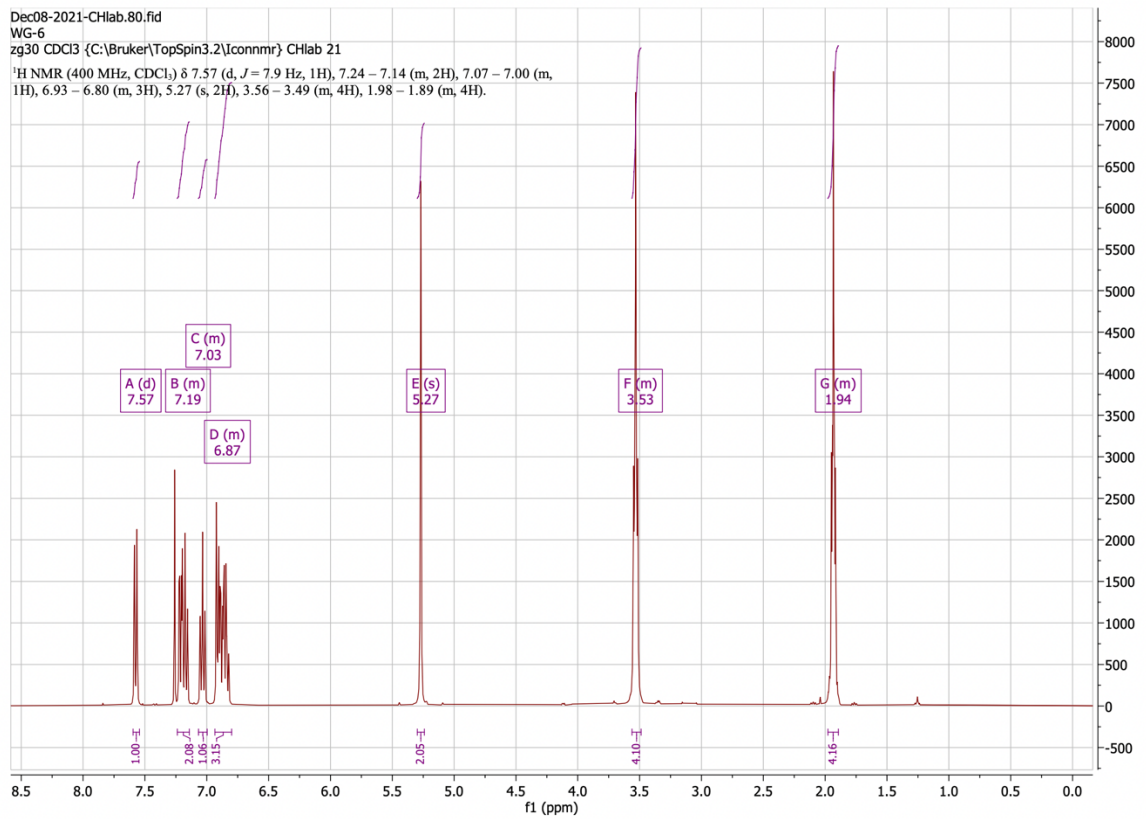

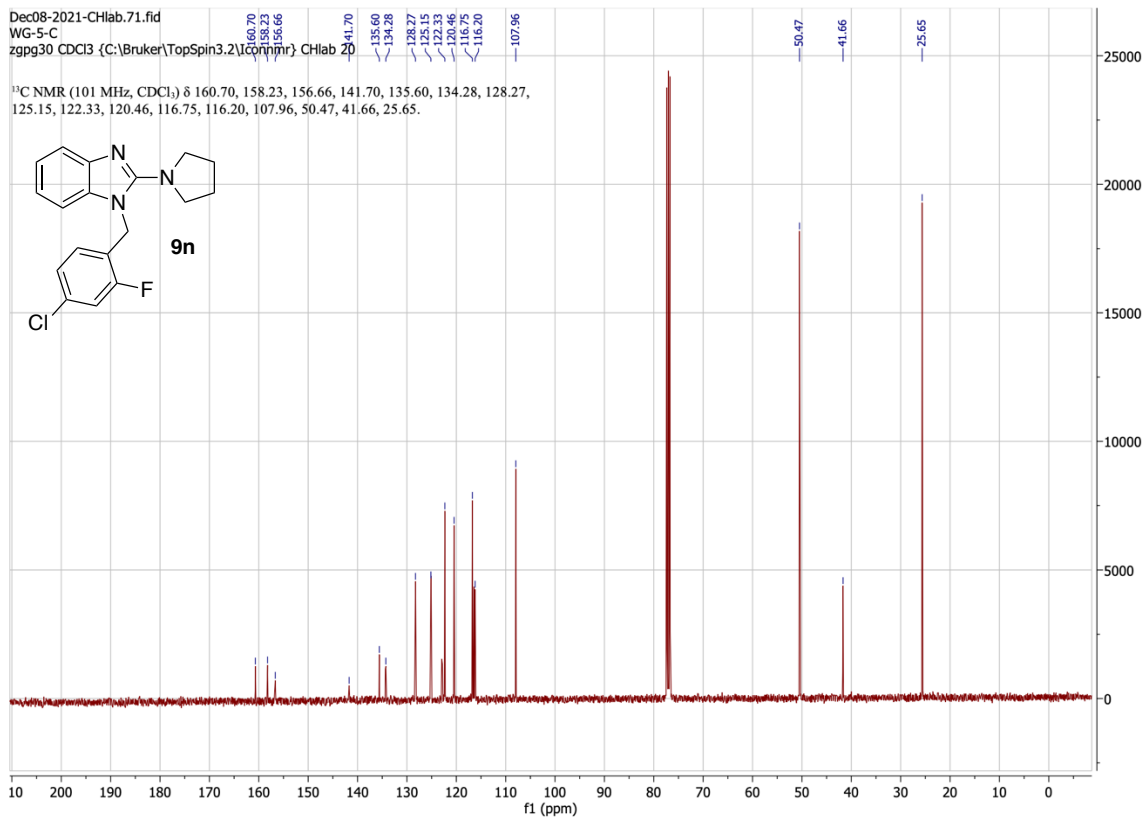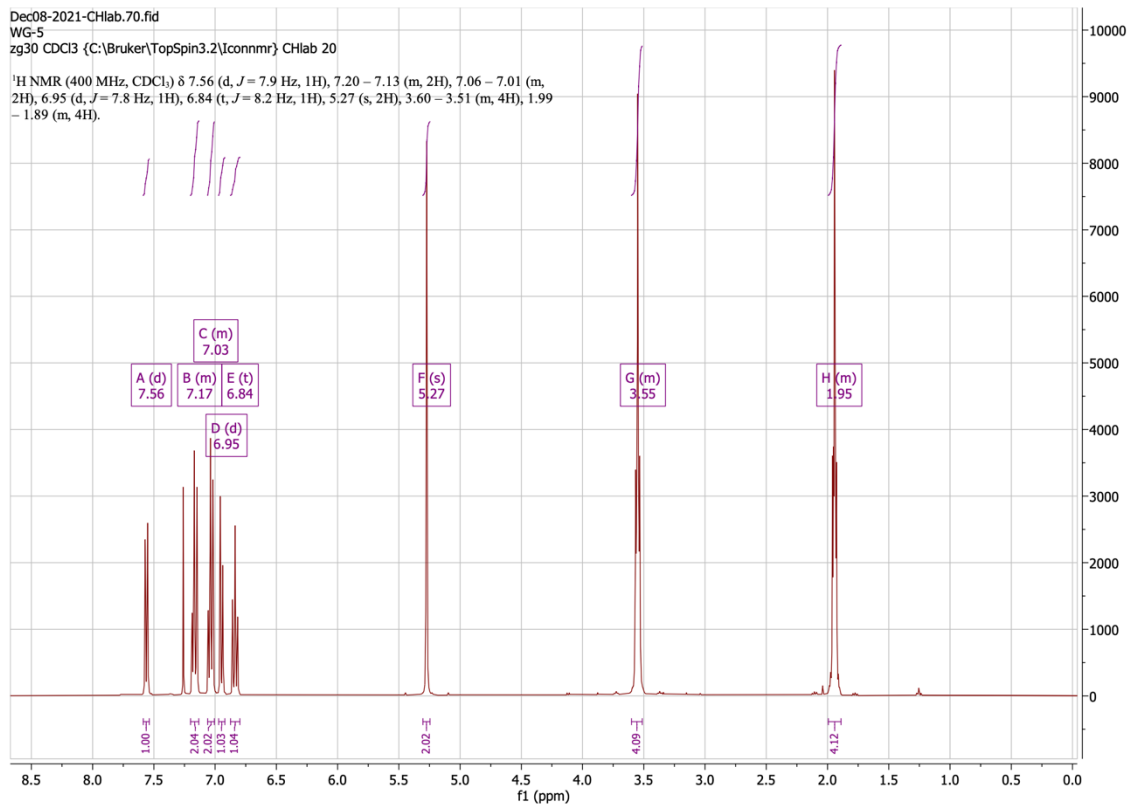

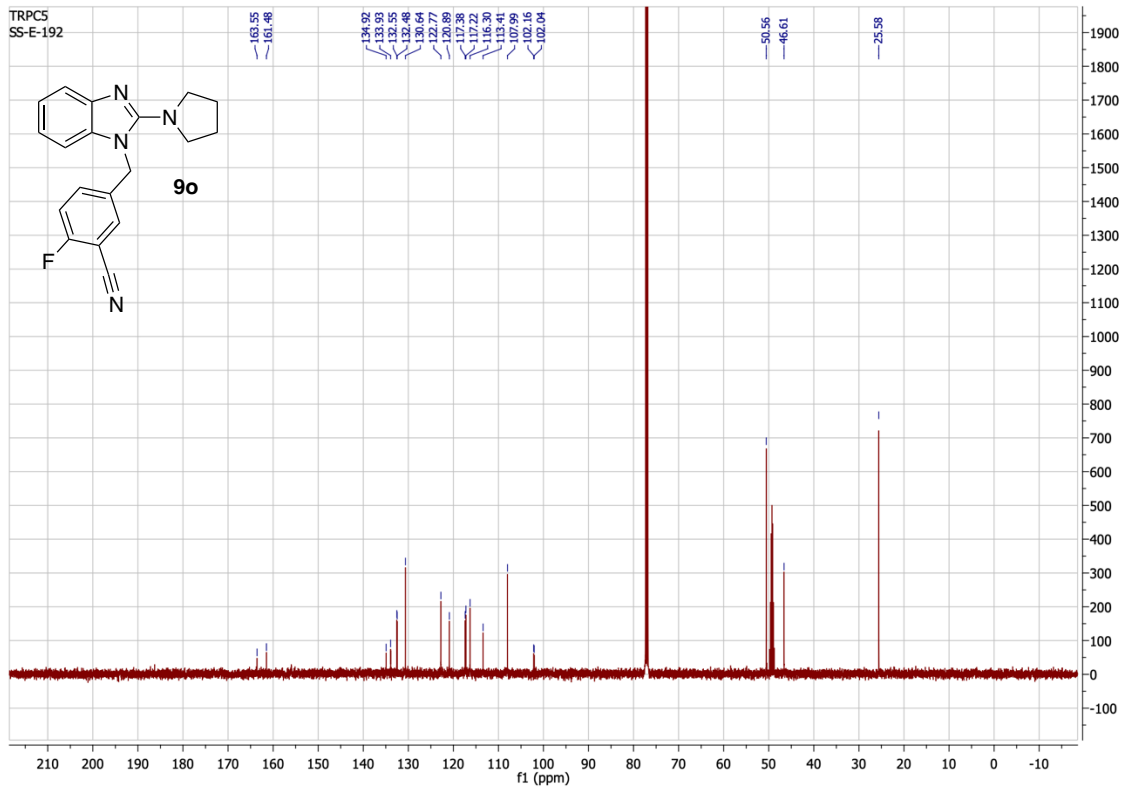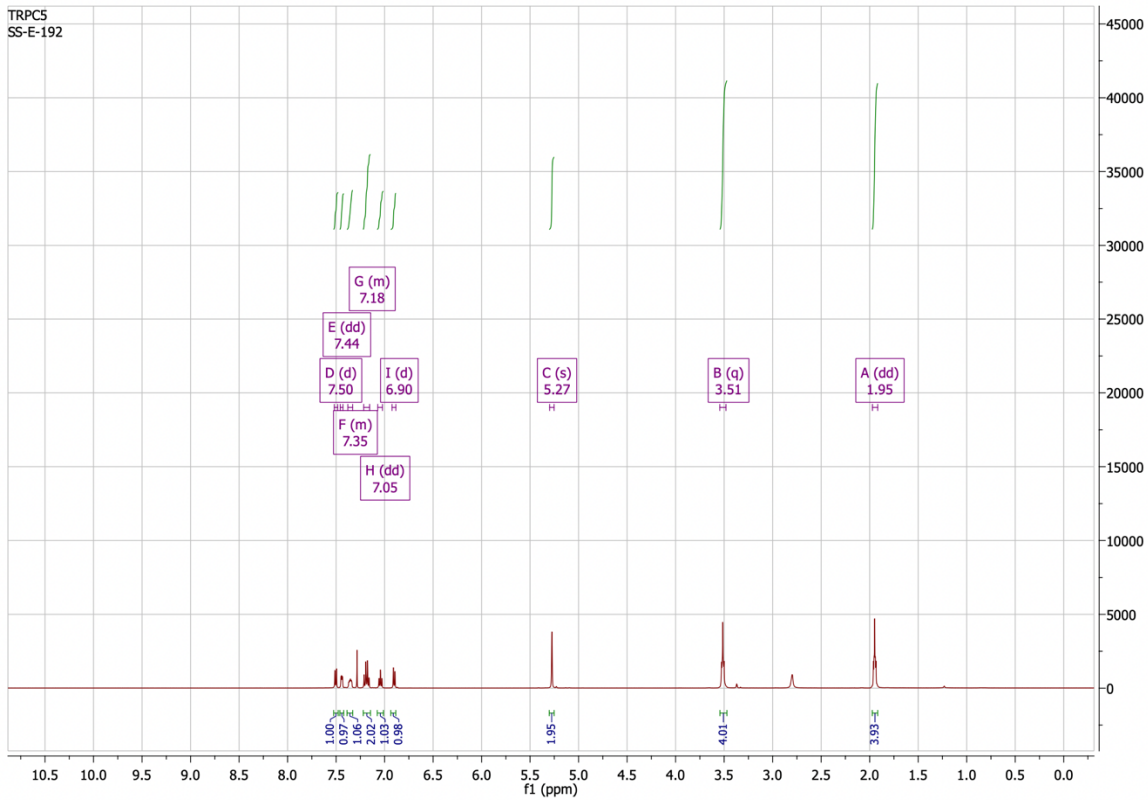

Dec07-2021-CHlab.81.fid

JH-113-C

zgpg30 CDCl3 {C:\Bruker\TopSpin3.2\iconnmr} CHlab 19

<sup>13</sup>C NMR (101 MHz, CDCl<sub>3</sub>) δ 162.72, 160.24, 156.54, 141.69, 135.53, 131.08, 129.02, 122.48, 120.52, 119.31, 116.76, 114.51, 107.92, 50.39, 44.34, 25.63.

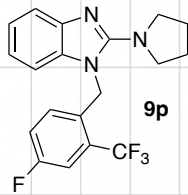

9p

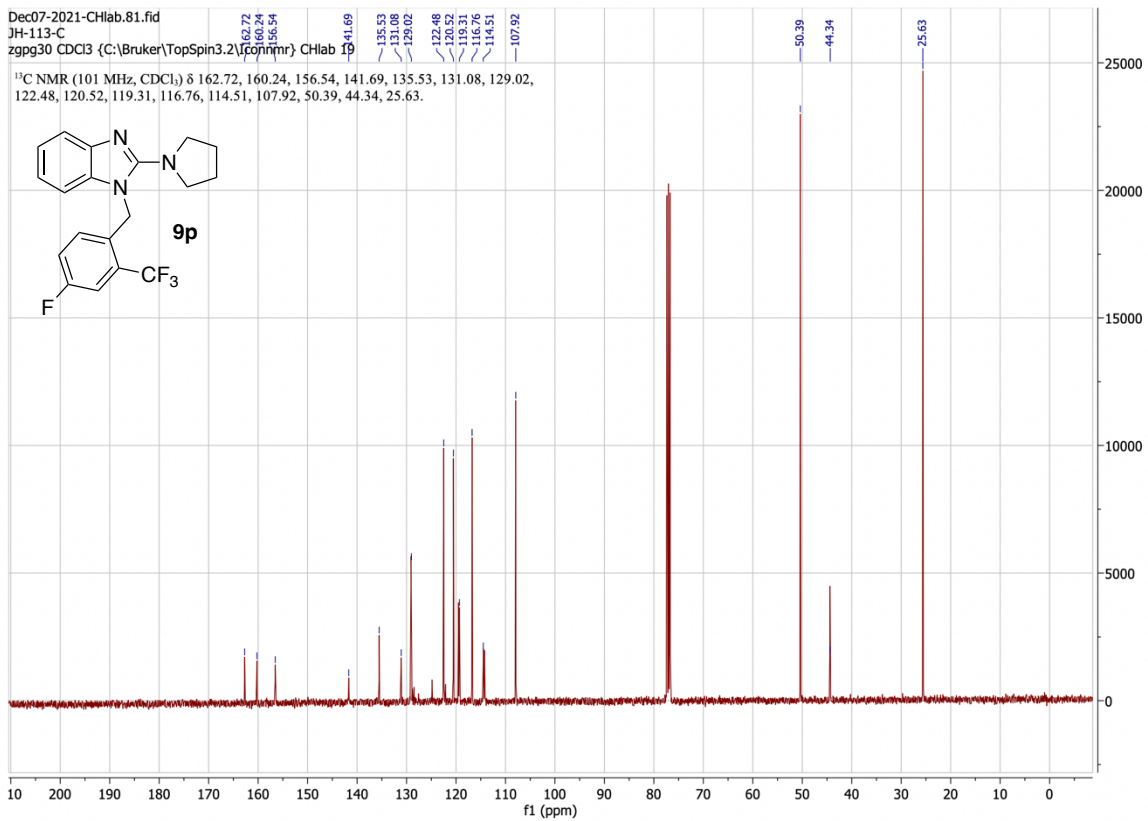

Dec07-2021-CHlab.80.fid

JH-113

zg30 CDCl3 {C:\Bruker\TopSpin3.2\iconnmr} CHlab 19

<sup>1</sup>H NMR (400 MHz, CDCl<sub>3</sub>) δ 7.58 (d, *J* = 7.9 Hz, 1H), 7.47 (dd, *J* = 8.6, 2.7 Hz, 1H), 7.18 (t, *J* = 7.6 Hz, 1H), 7.12 (td, *J* = 8.2, 2.7 Hz, 1H), 7.03 (t, *J* = 7.6 Hz, 1H), 6.96 (dd, *J* = 8.8, 5.2 Hz, 1H), 6.88 (d, *J* = 7.8 Hz, 1H), 5.42 (s, 2H), 3.52 (td, *J* = 6.6, 5.4, 3.0 Hz, 4H), 1.96 – 1.89 (m, 4H).

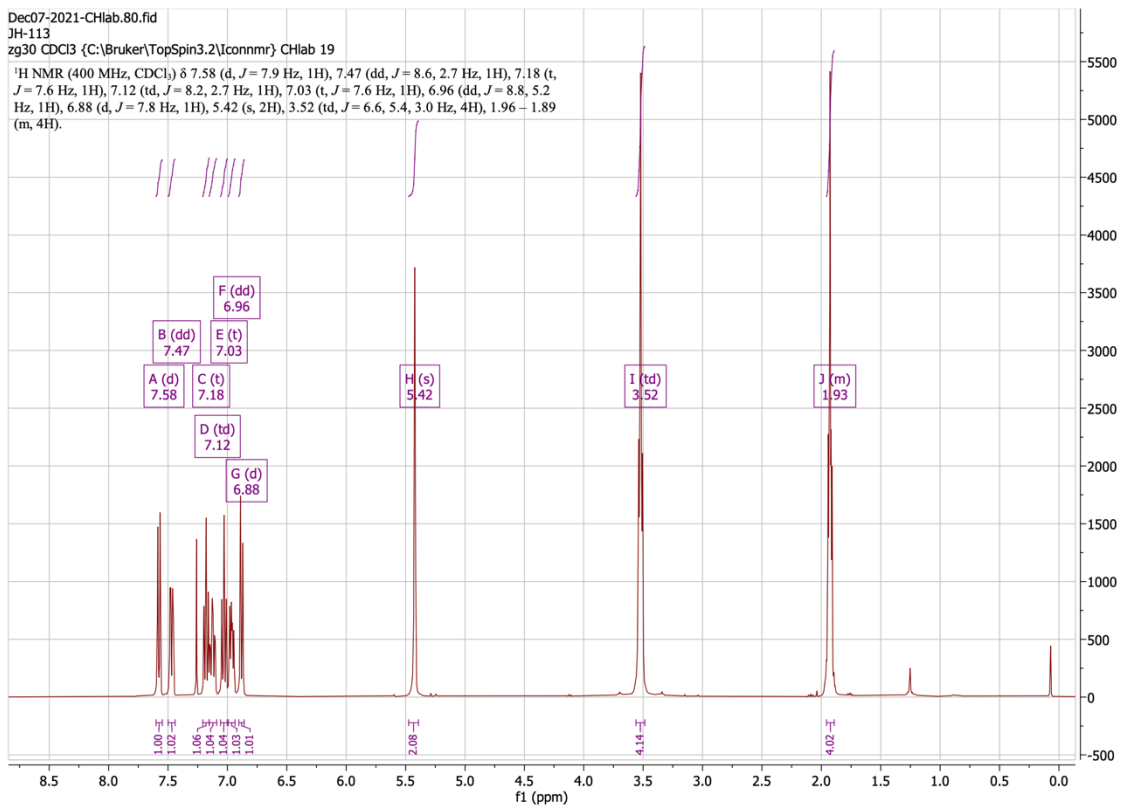

Mar18-2020-CHlab  
SS-E-117-A

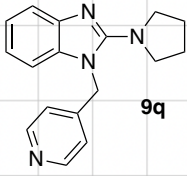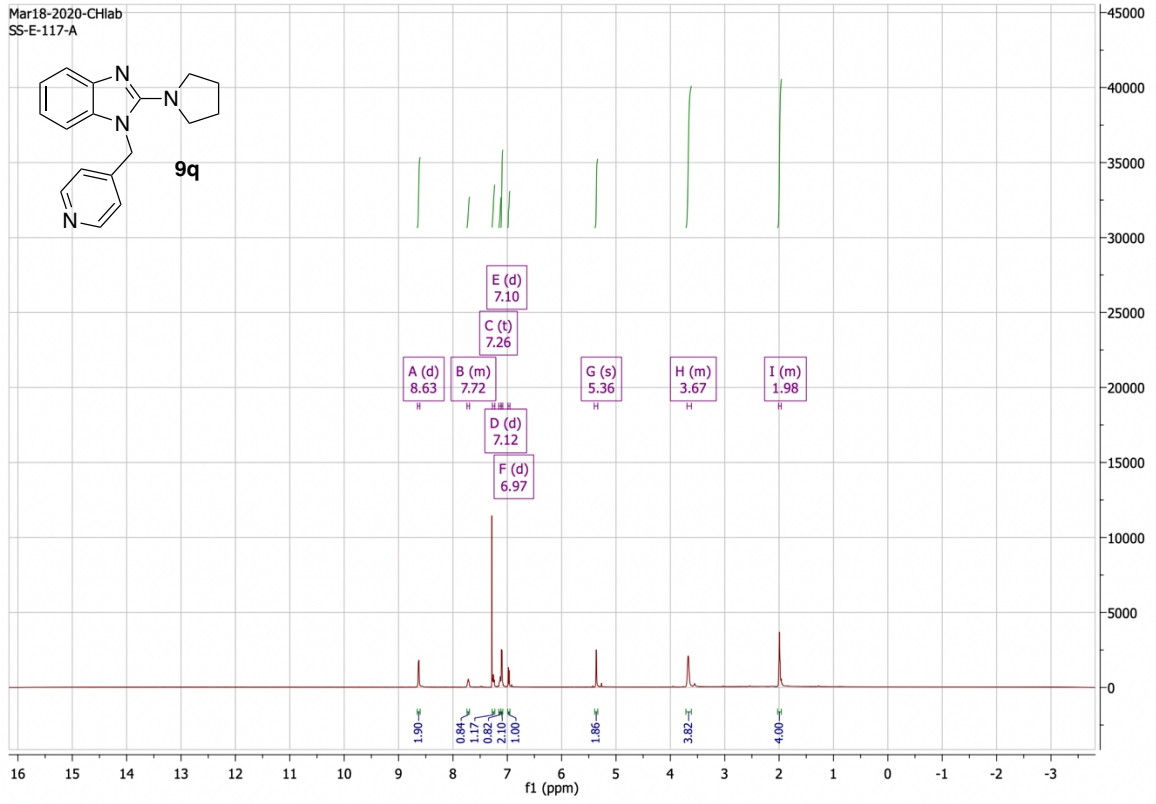



Mar18-2020-CHlab  
ss-e-117-c

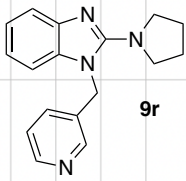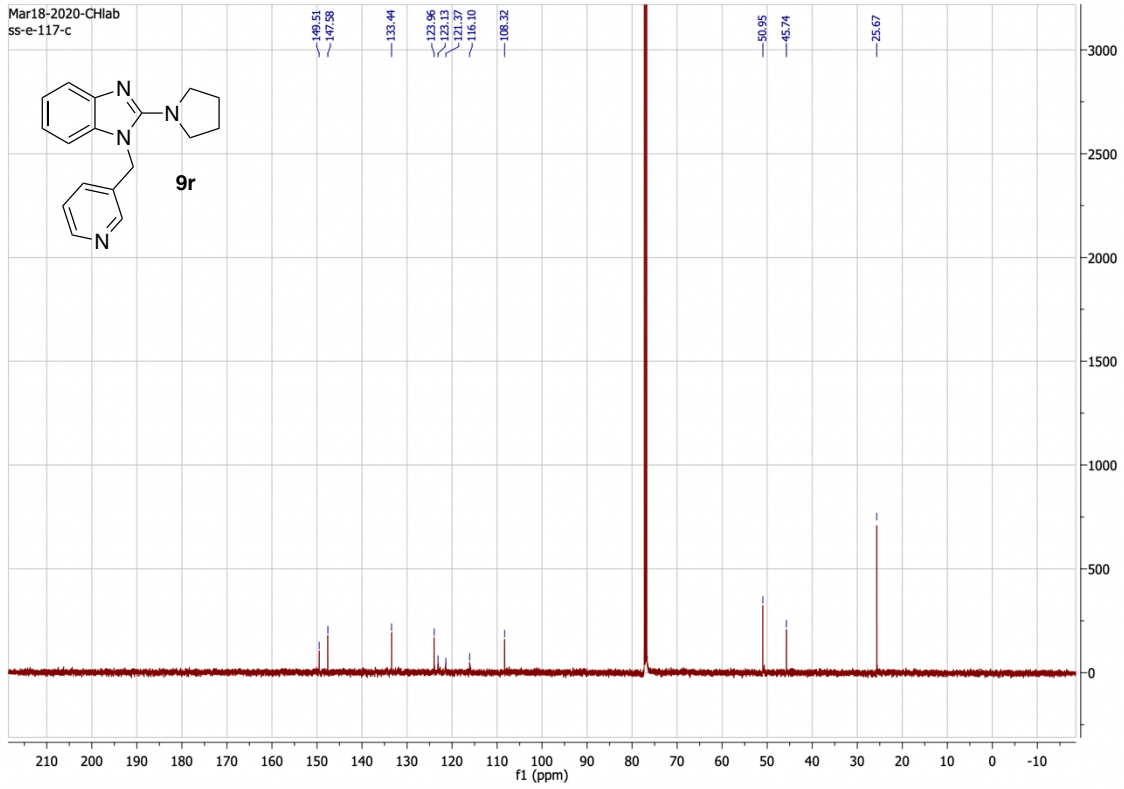

Jul20-2019-CHlab  
SS-E-117-C

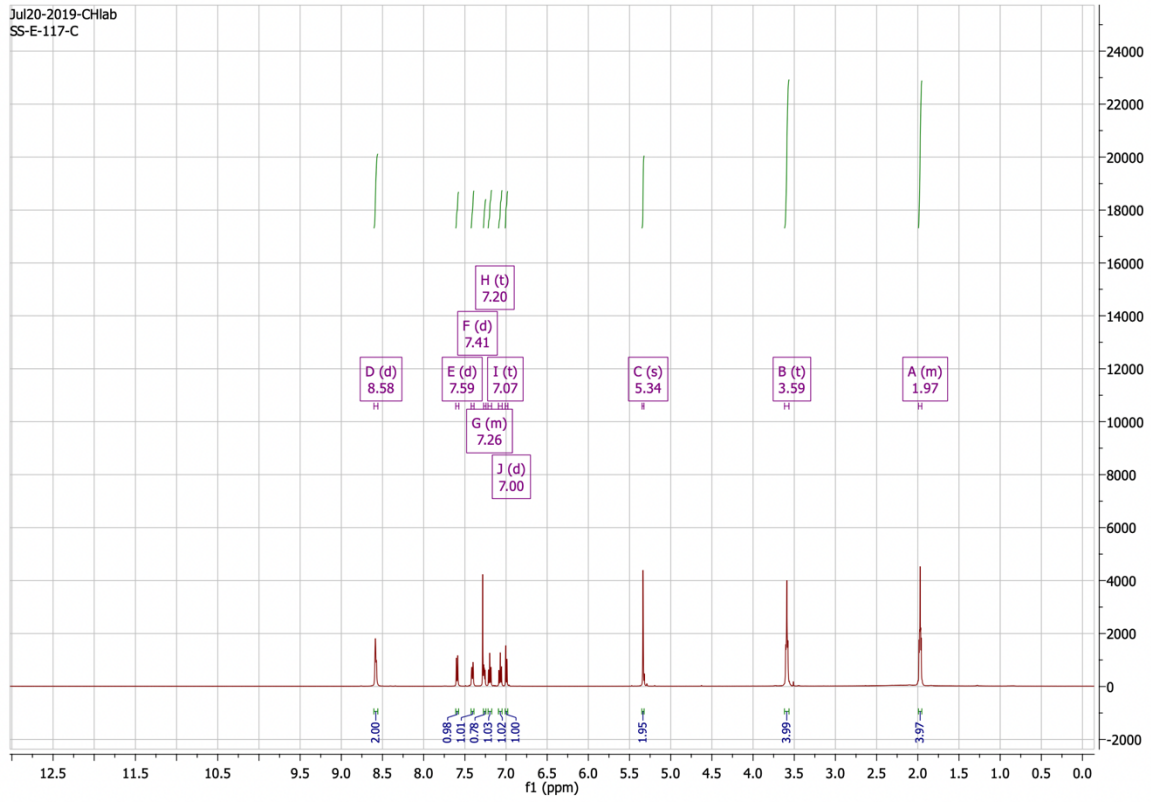

Mar19-2020-CHlab  
SS-E-117-B

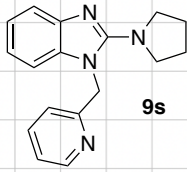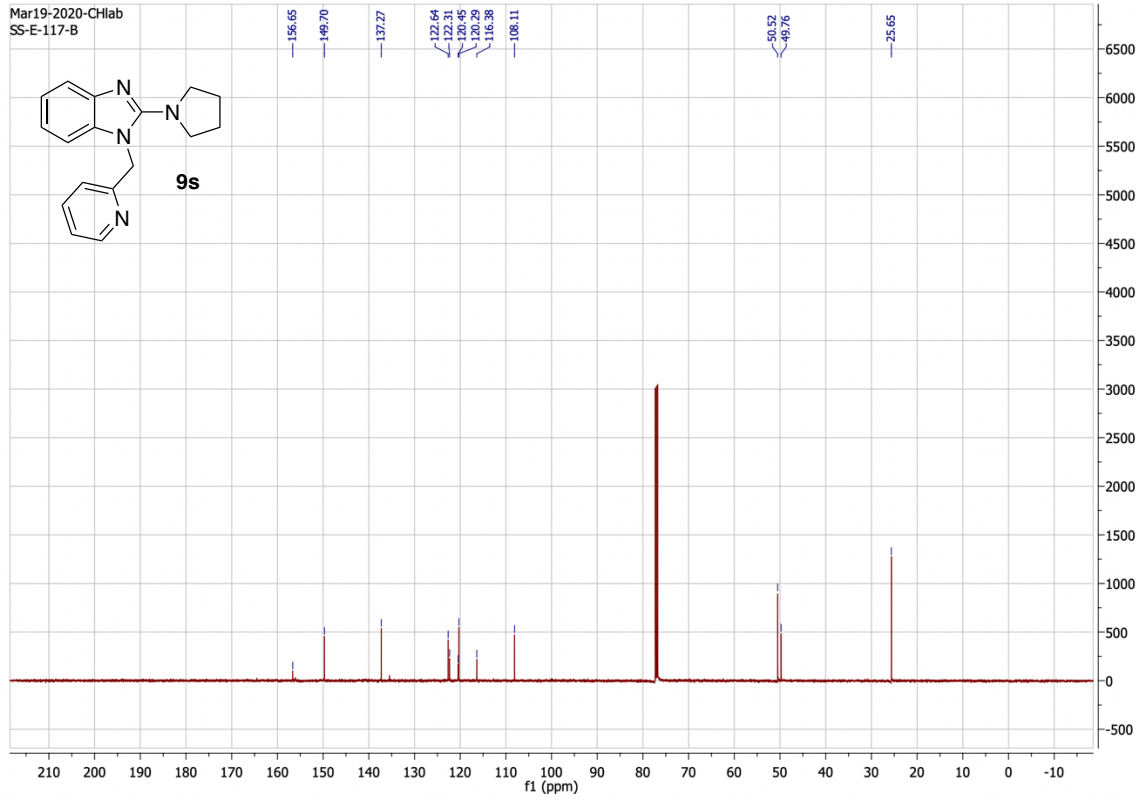

Mar19-2020-CHlab  
SS-E-117-B

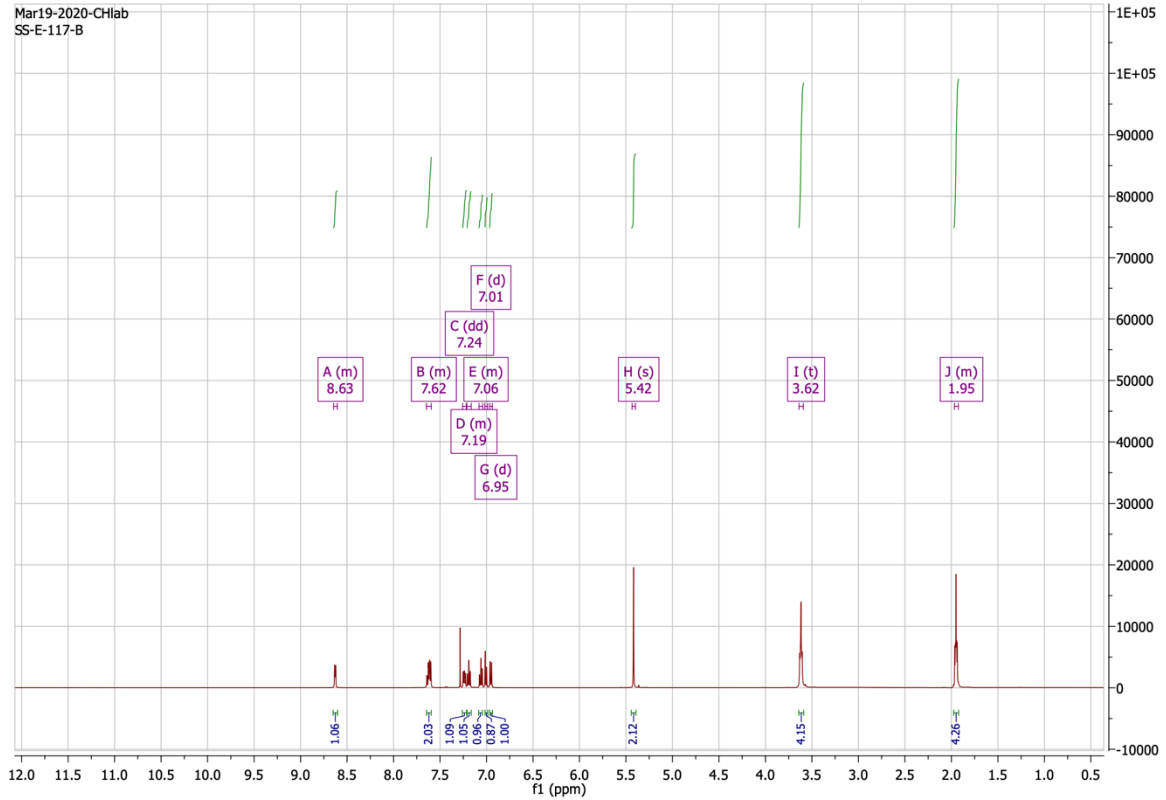

Mar18-2020-CHlab  
SS-E-74-B

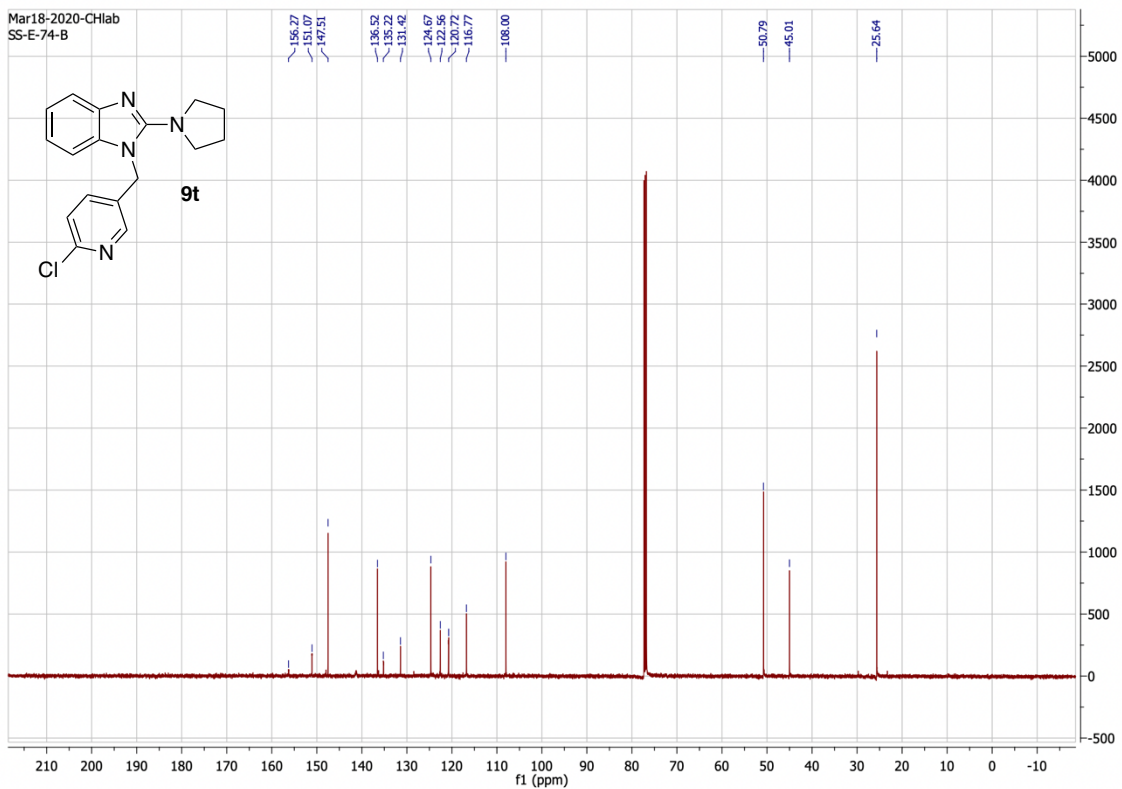

Mar18-2020-CHlab  
SS-E-74-B

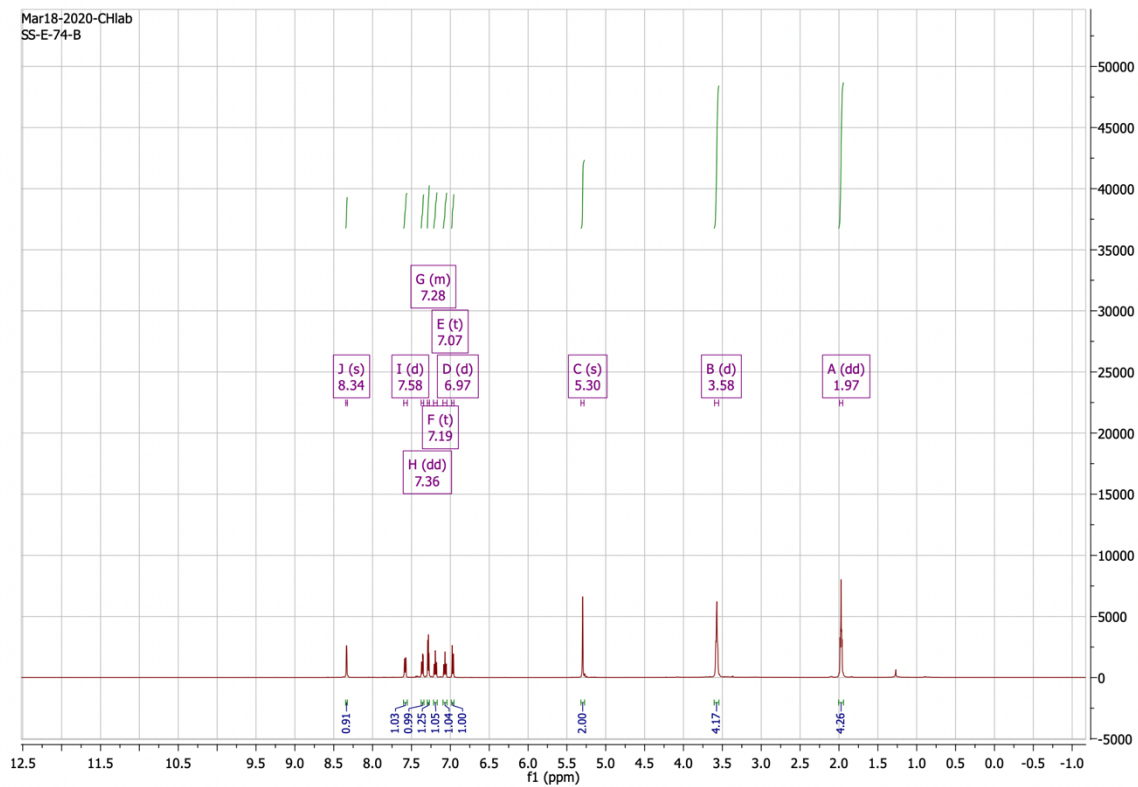

Jul20-2019-CHlab  
jh\_87

<sup>1</sup>H NMR (499 MHz, CDCl<sub>3</sub>) δ 7.90 (d, *J* = 7.7 Hz, 2H), 7.68 (t, *J* = 7.5 Hz, 1H), 7.52 (t, *J* = 7.6 Hz, 3H), 7.11 (t, *J* = 7.7 Hz, 1H), 6.81 (t, *J* = 7.7 Hz, 1H), 6.52 (d, *J* = 8.1 Hz, 1H), 3.49 (s, 4H), 1.91 (dt, *J* = 11.9, 5.8 Hz, 5H).

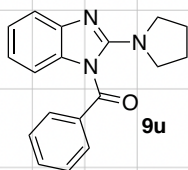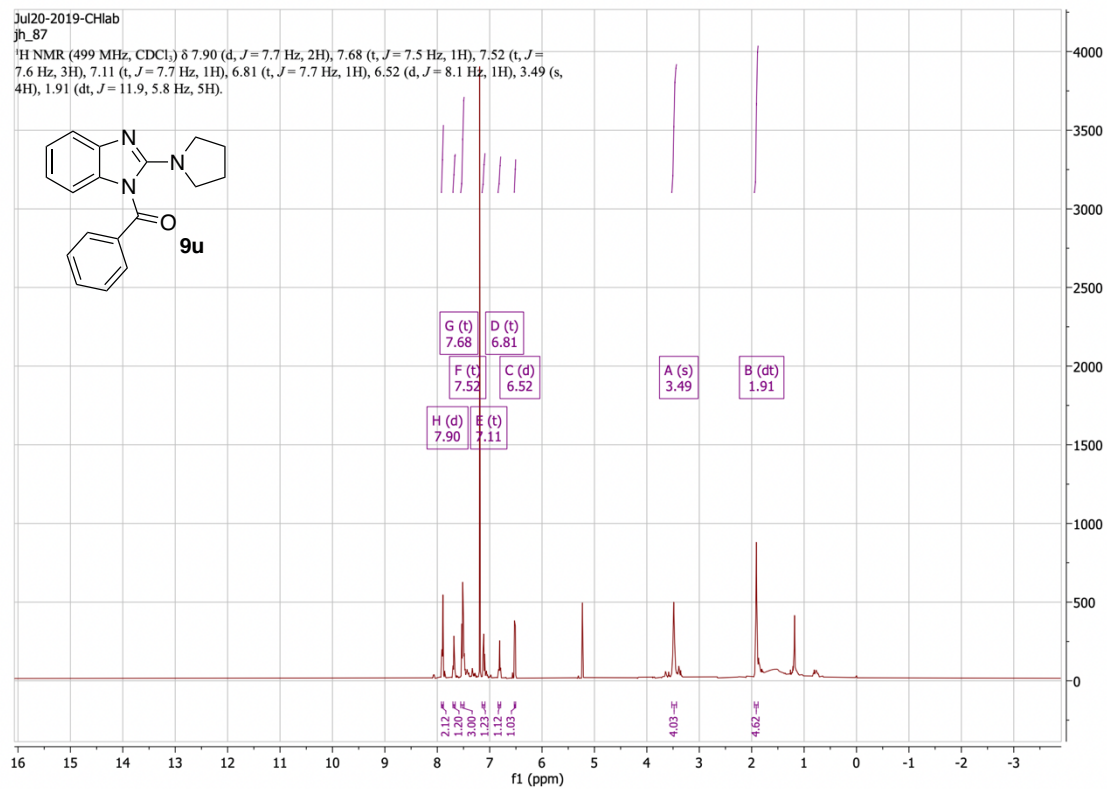

Jul21-2019-CHlab  
JH-110

$^{13}\text{C}$  NMR (126 MHz,  $\text{CDCl}_3$ )  $\delta$  157.50, 136.40, 134.10, 132.91, 128.80, 126.91, 125.96, 121.86, 116.87, 116.25, 52.77, 25.70.

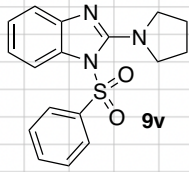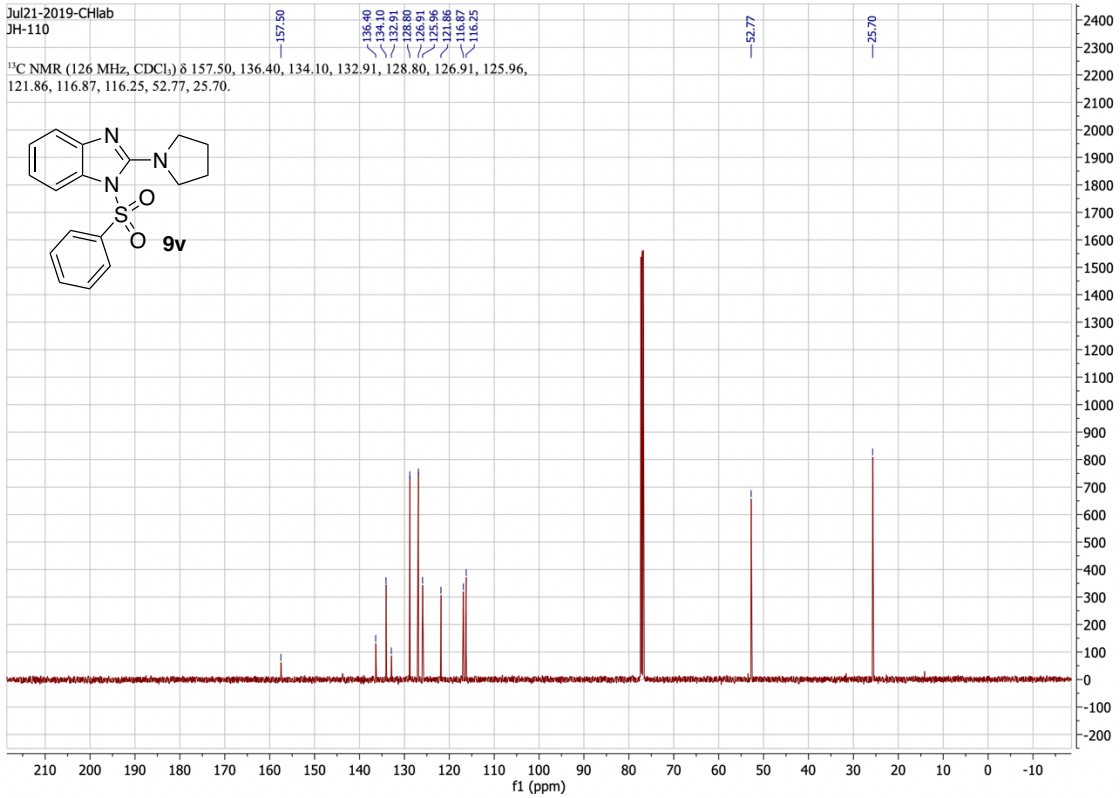

Jul21-2019-CHlab  
JH-110

$^1\text{H}$  NMR (499 MHz,  $\text{CDCl}_3$ )  $\delta$  7.89 (d,  $J = 8.0$  Hz, 1H), 7.60 (dd,  $J = 8.4, 1.4$  Hz, 2H), 7.49 (t,  $J = 7.5$  Hz, 1H), 7.33 (d,  $J = 7.8$  Hz, 2H), 7.24 (dd,  $J = 7.8, 1.3$  Hz, 1H), 7.19 (td,  $J = 7.6, 1.2$  Hz, 1H), 7.10 (td,  $J = 7.7, 1.4$  Hz, 1H), 3.75 (td,  $J = 6.7, 5.4, 3.0$  Hz, 4H), 2.02 - 1.97 (m, 4H).

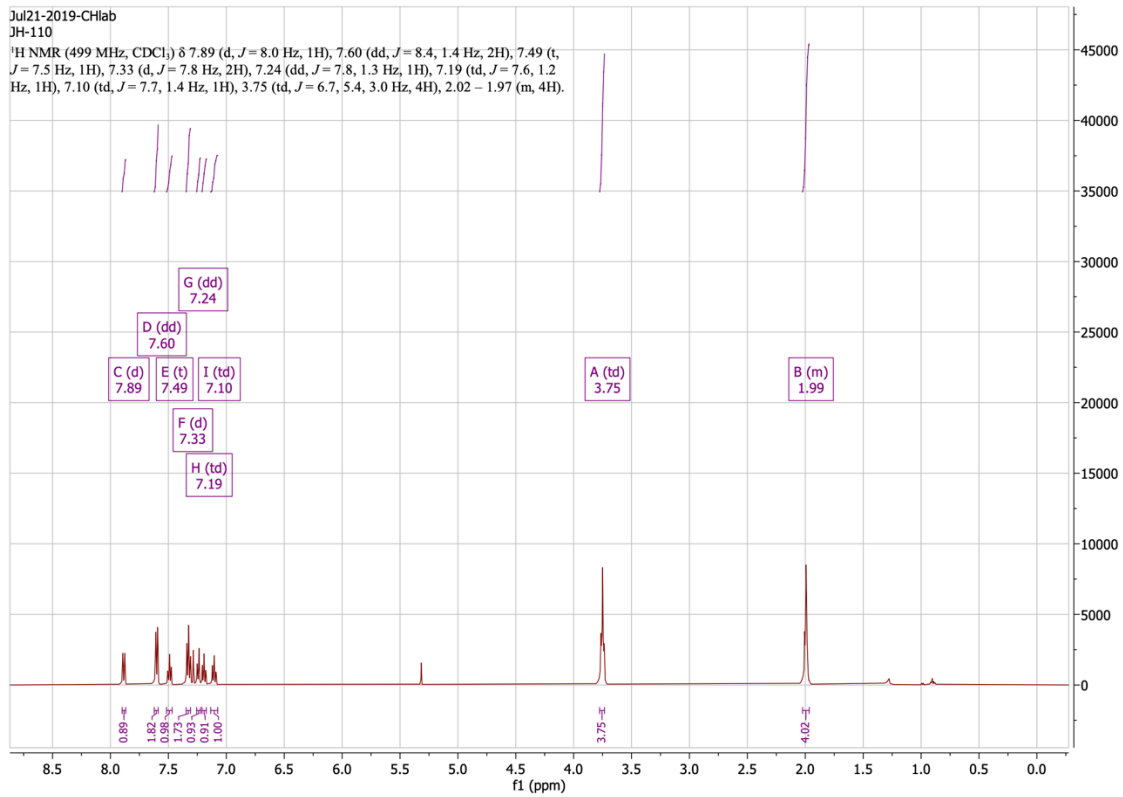

Mar26-2020-CHlab  
SS-D-177

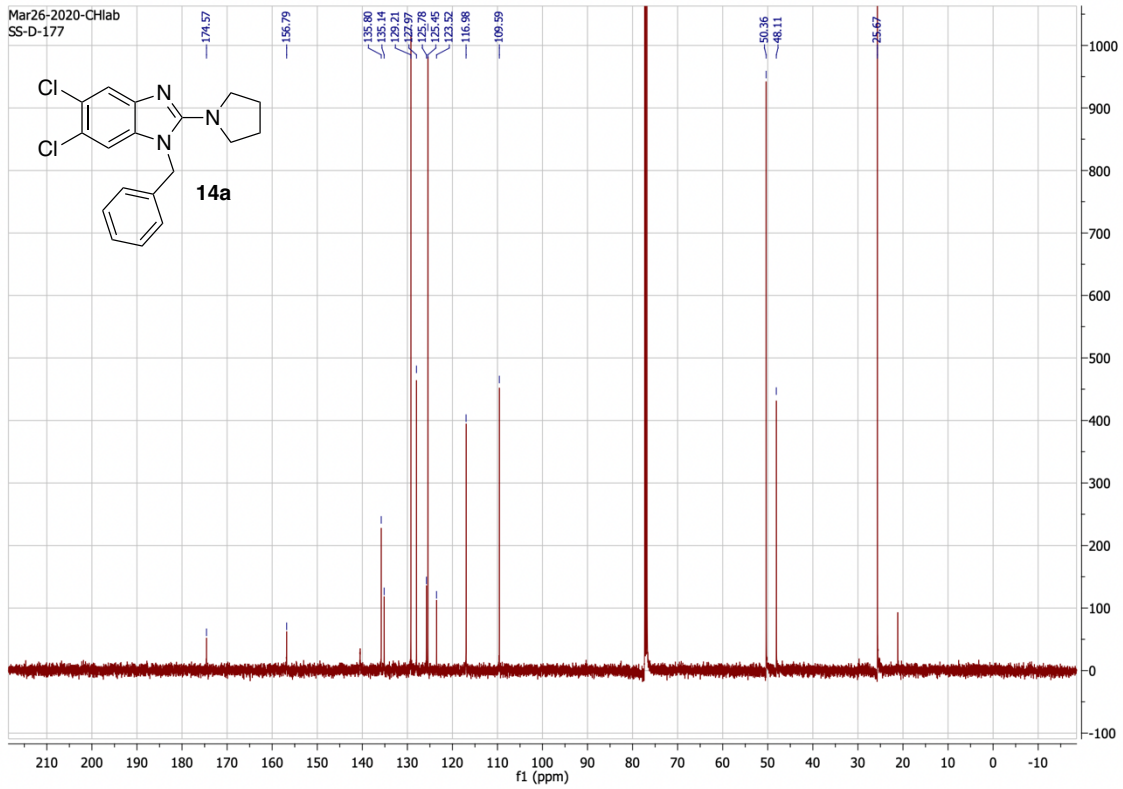

Mar26-2020-CHlab  
SS-D-177

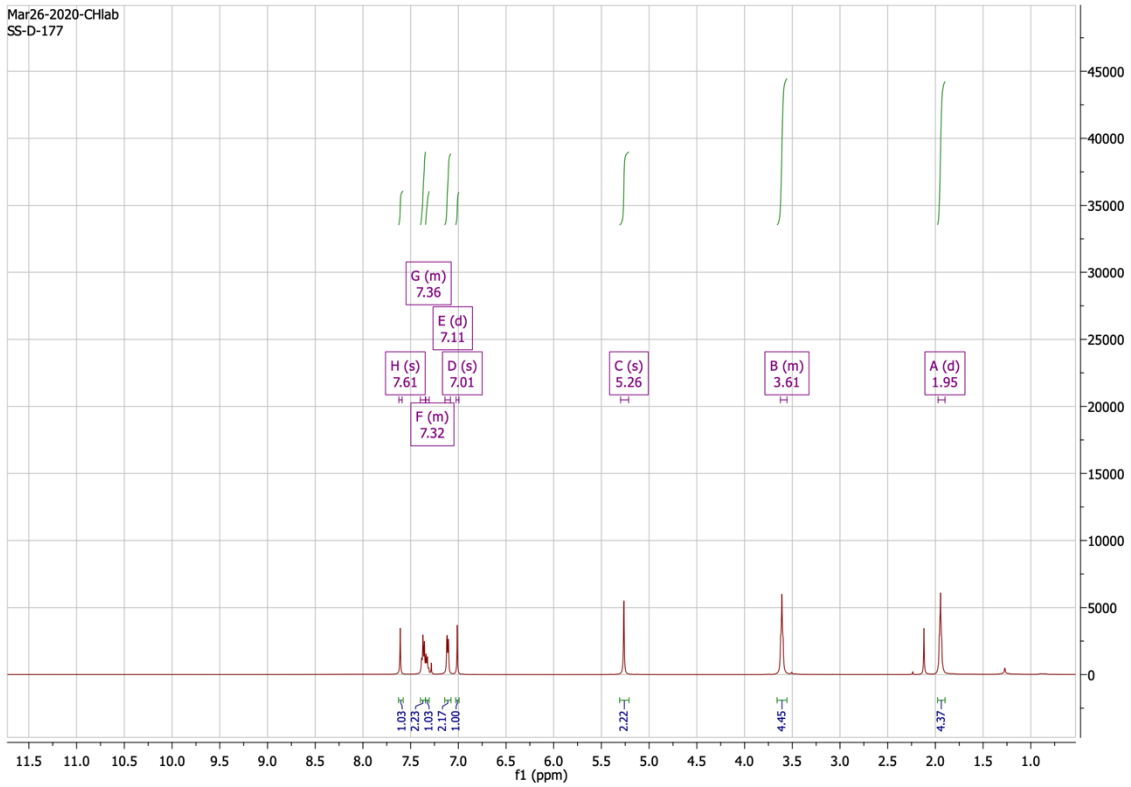

Mar26-2020-CHlab  
SS-D-178

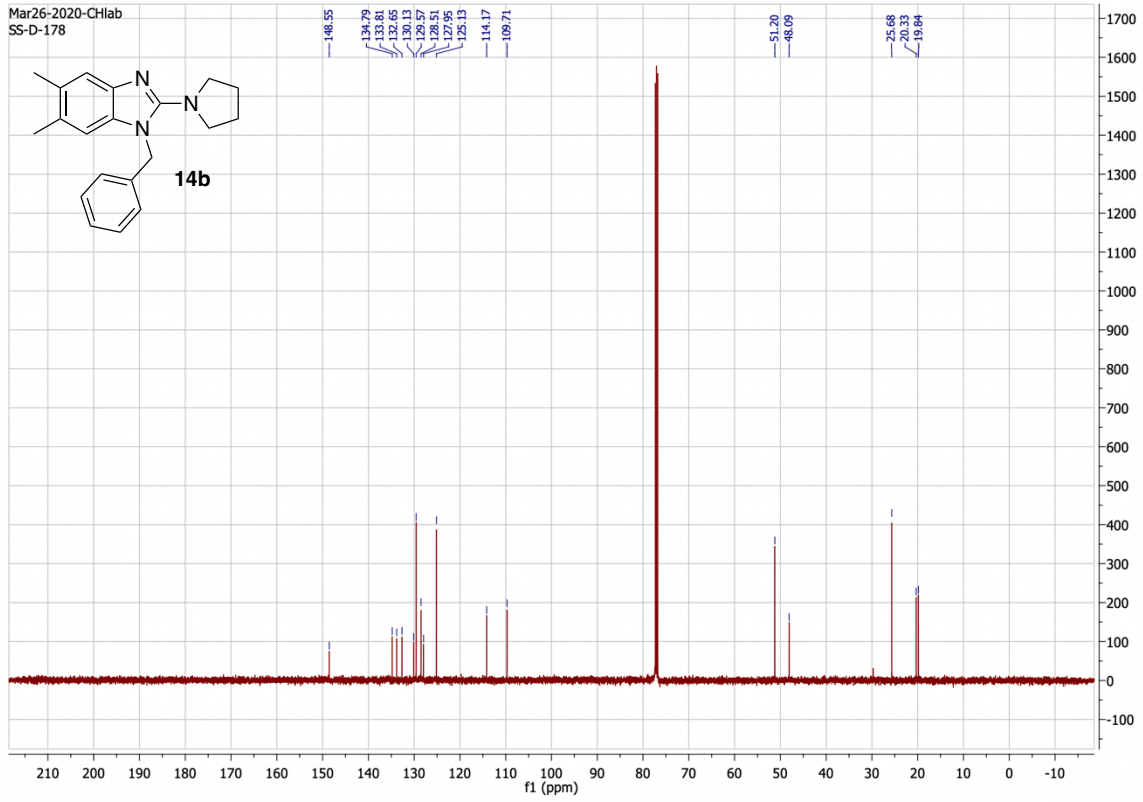

Mar26-2020-CHlab  
SS-D-178

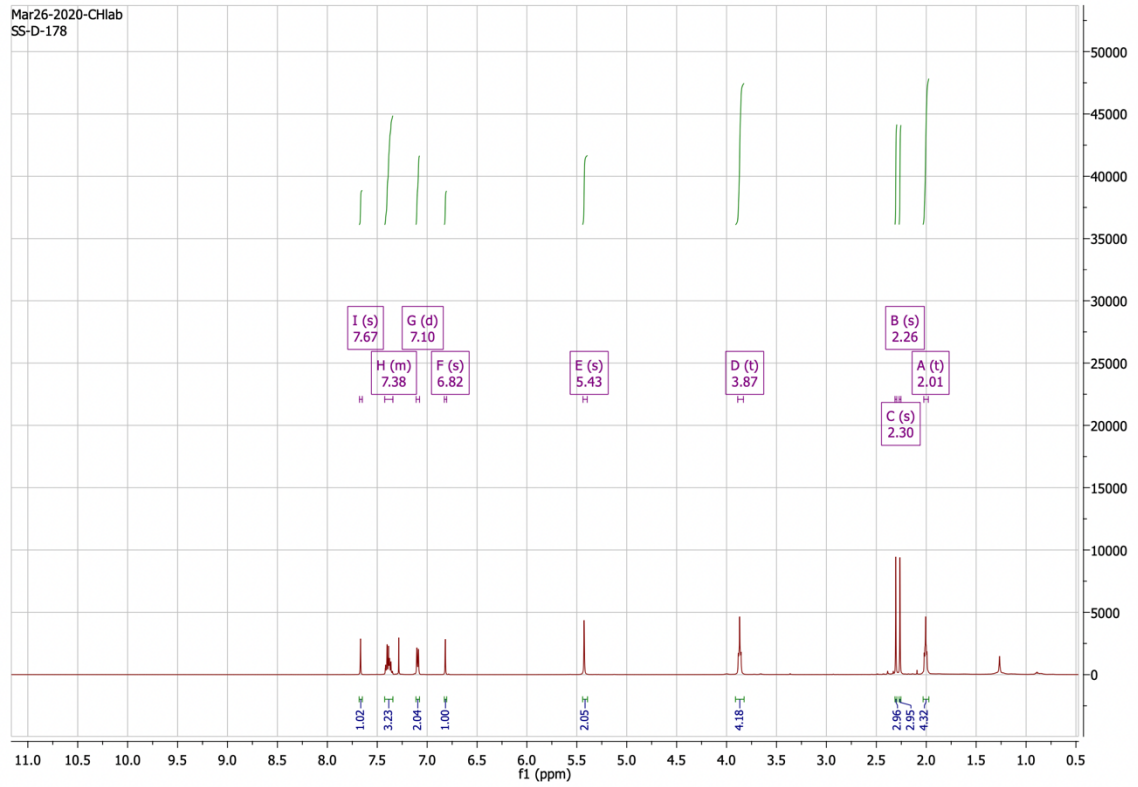

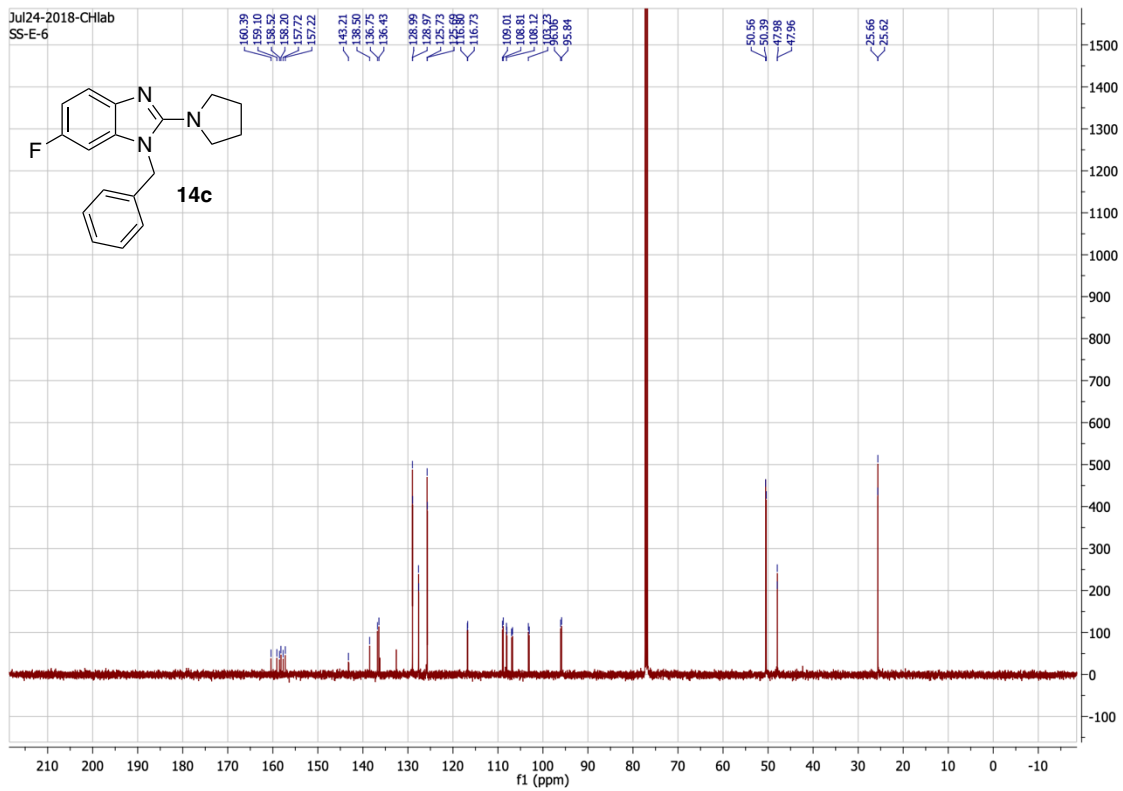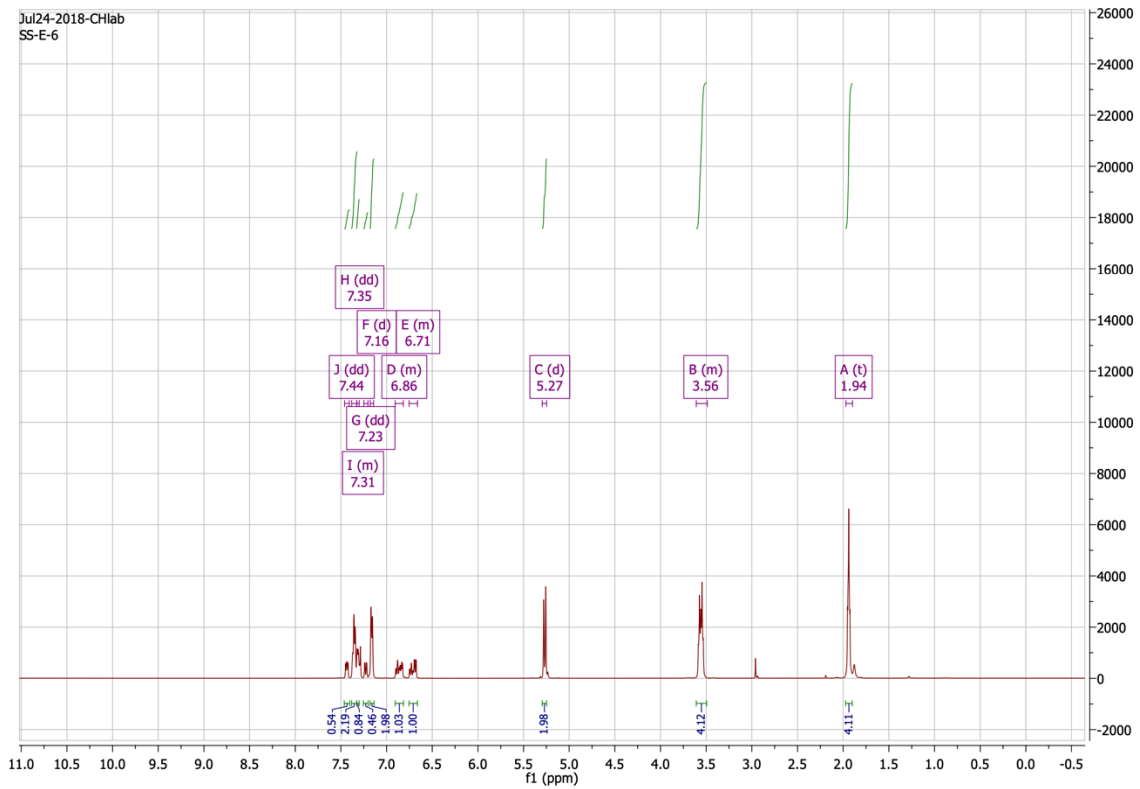



Aug-18-2021  
SS-E-159-B

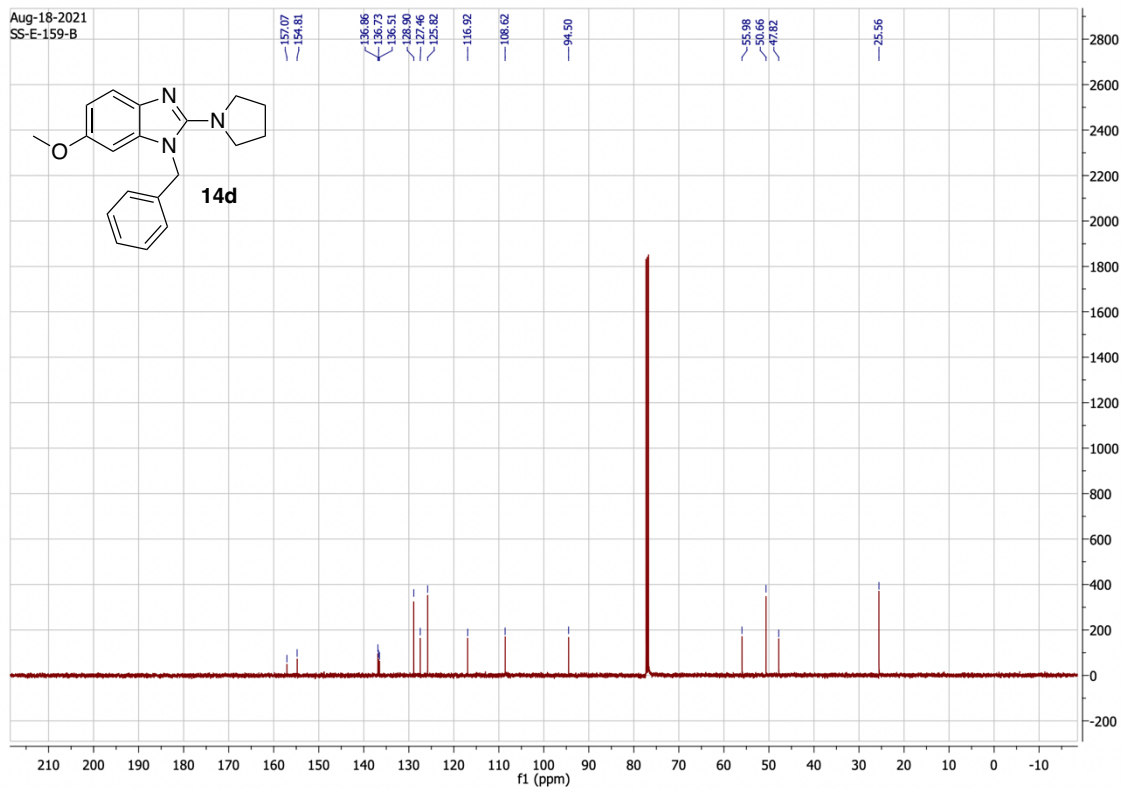

Aug-18-2021  
SS-E-159-B

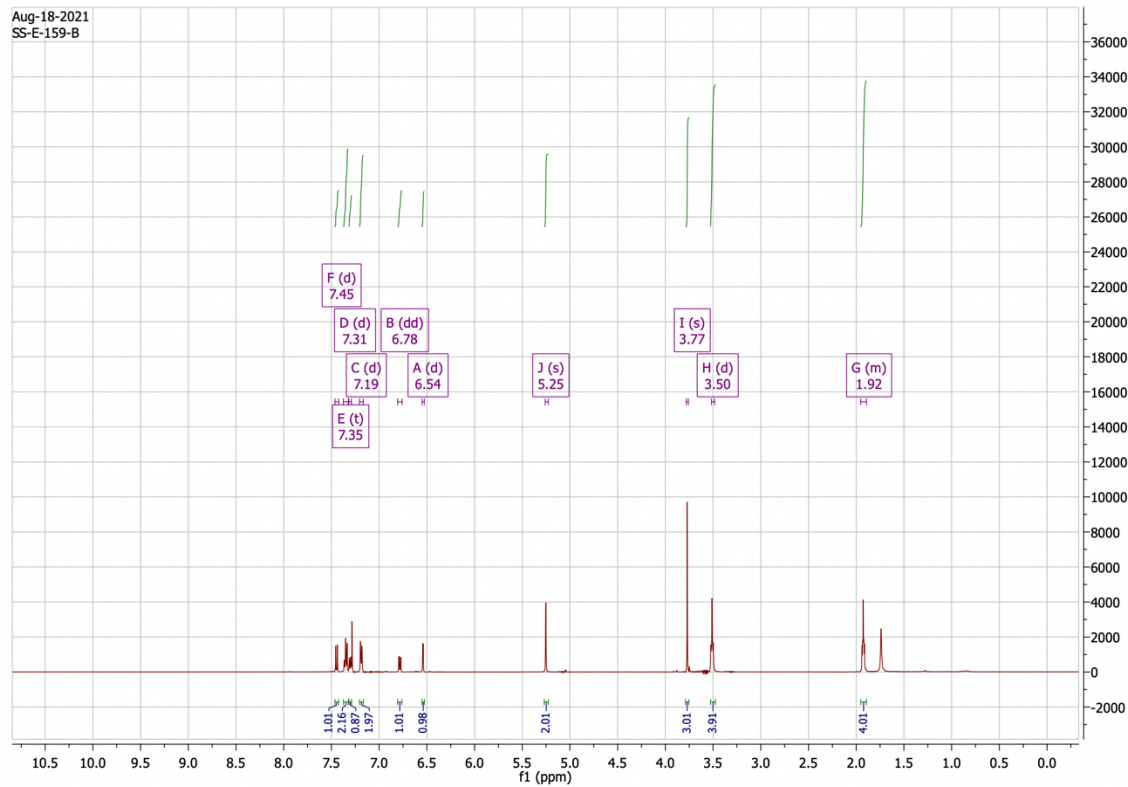

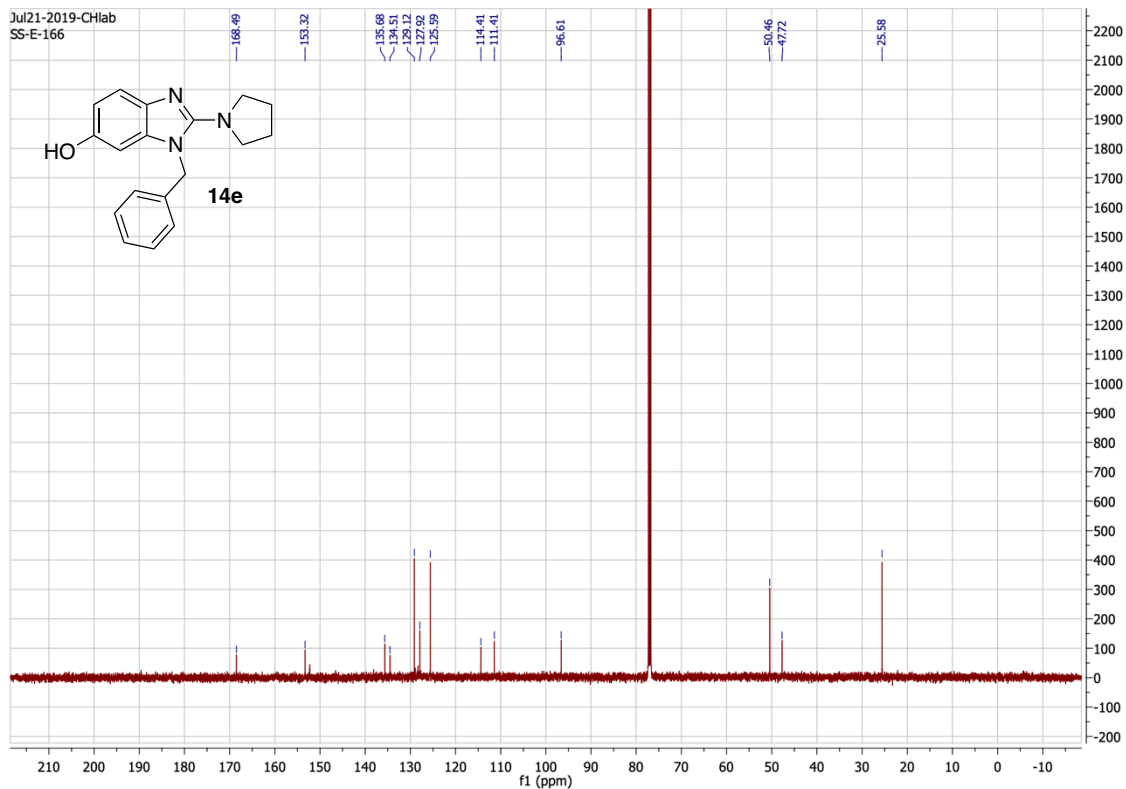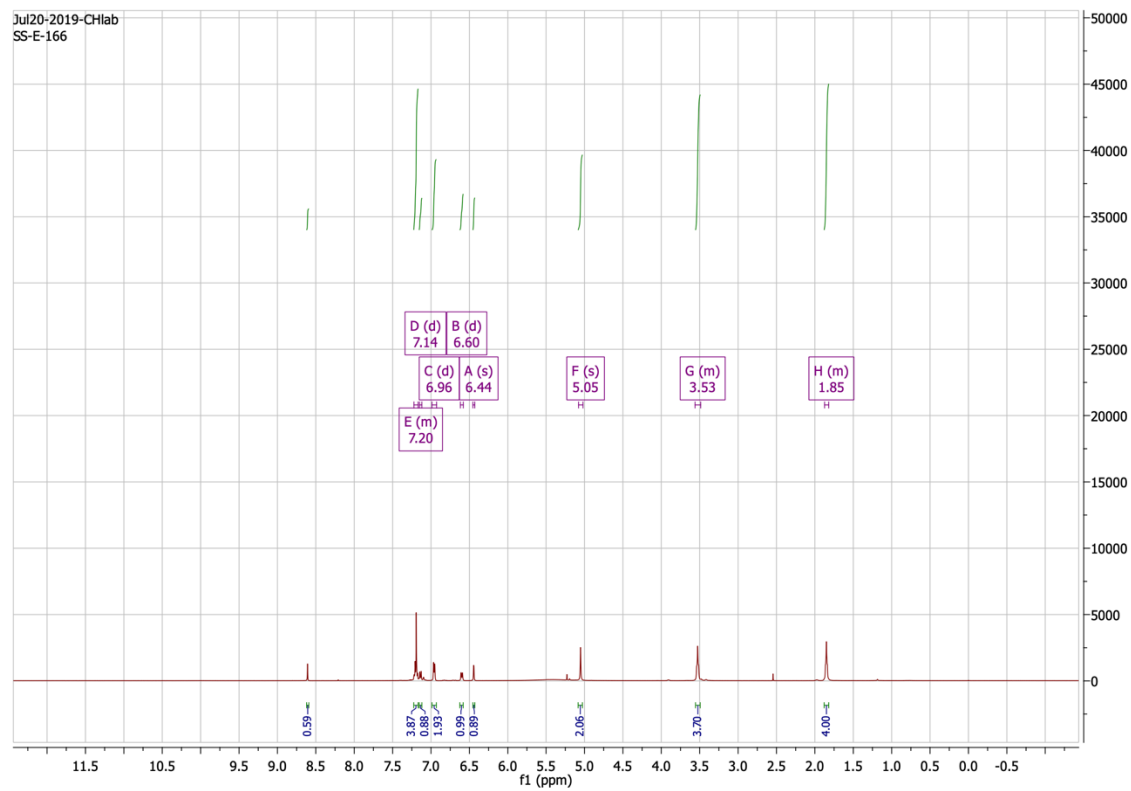

Jul20-2019-CHlab  
SS-E-170-A

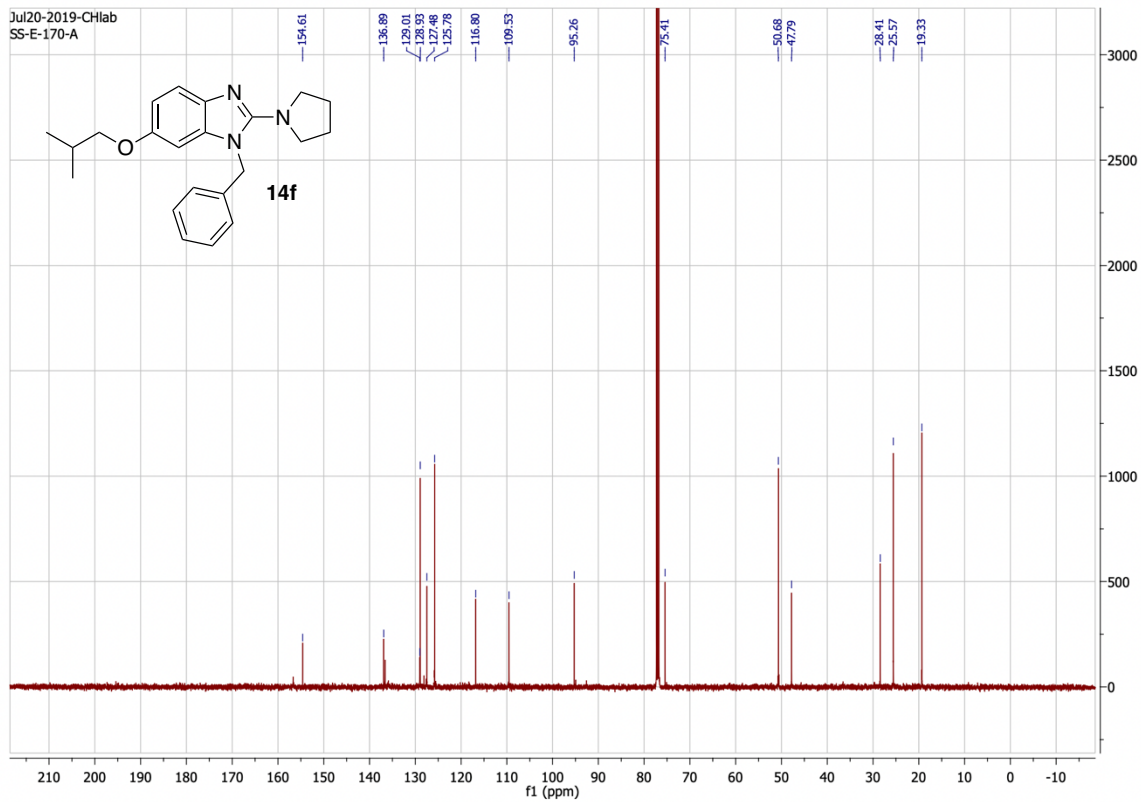

Jul20-2019-CHlab  
SS-E-170-A

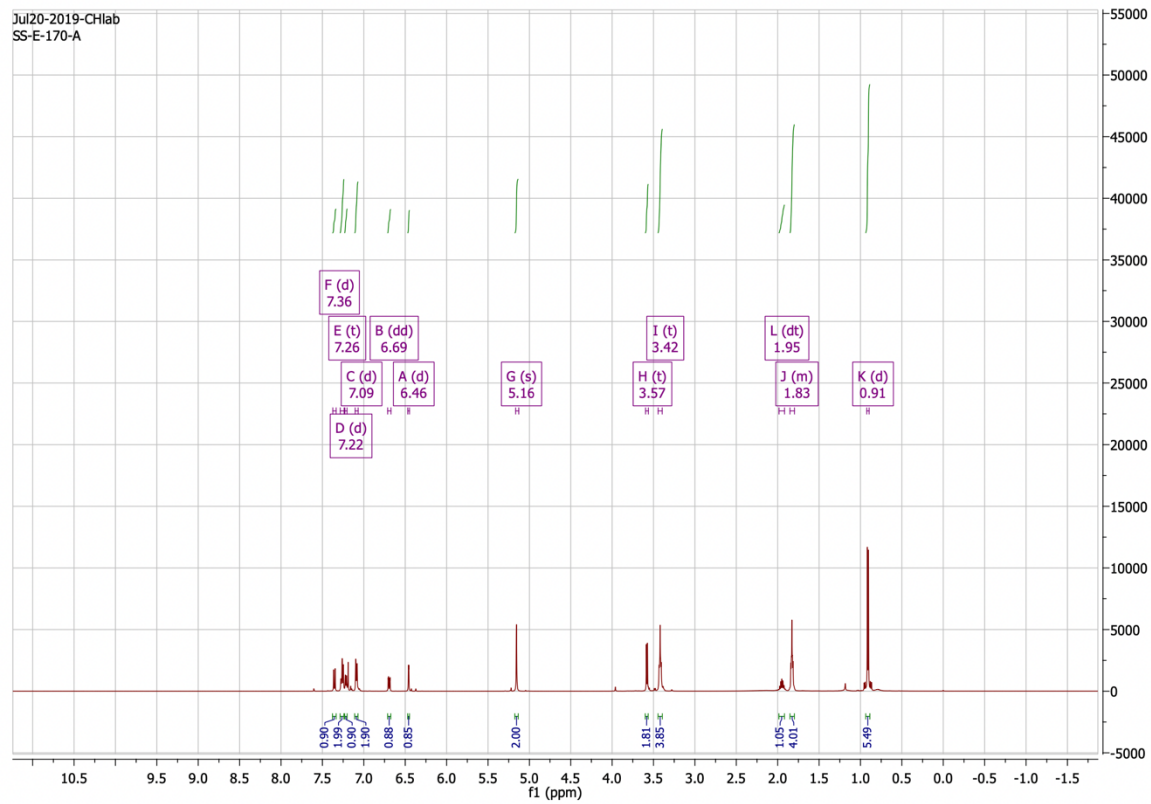

Jul21-2019-CHlab  
SS-E-170-B

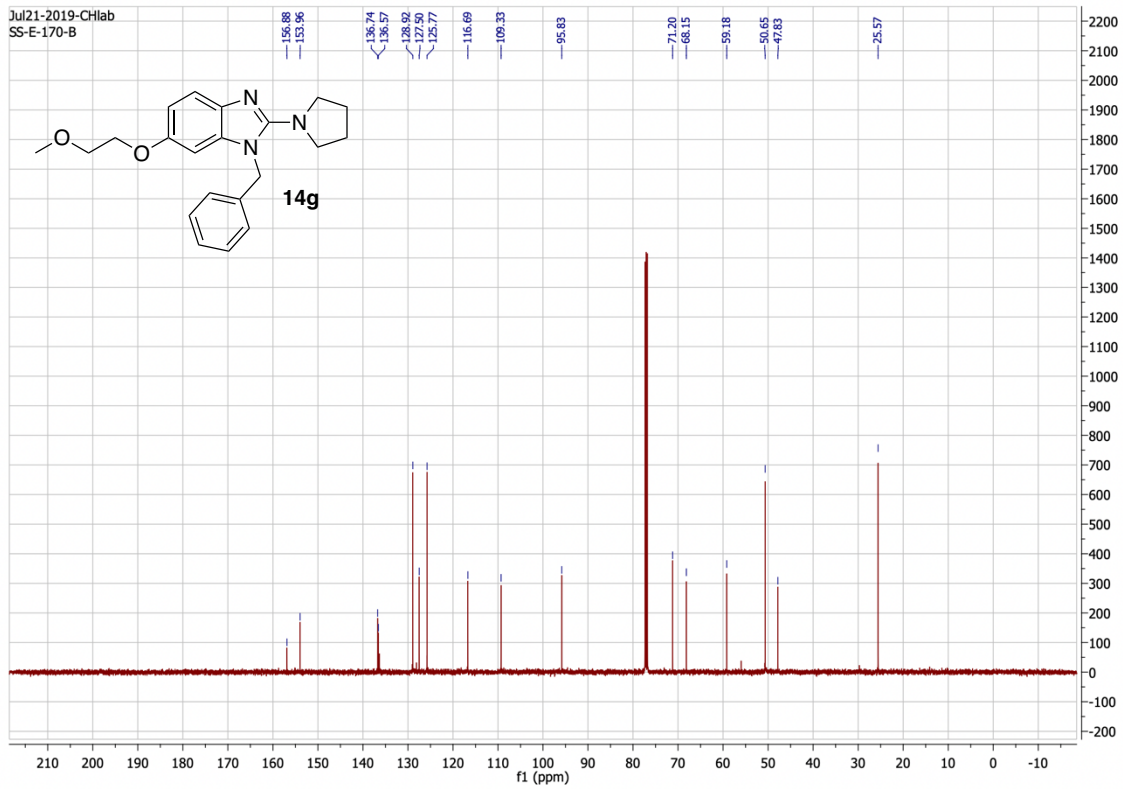

Jul21-2019-CHlab  
SS-E-170-B

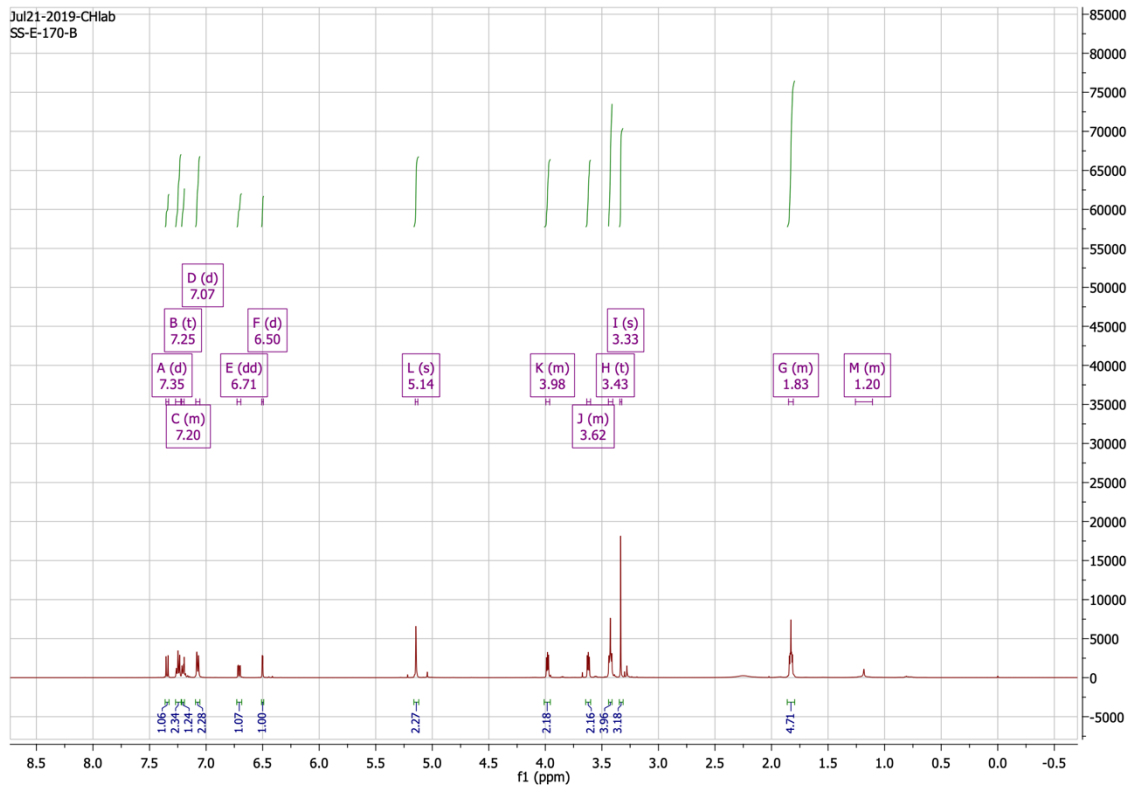

Jul21-2019-CHlab  
SS-E-174-B

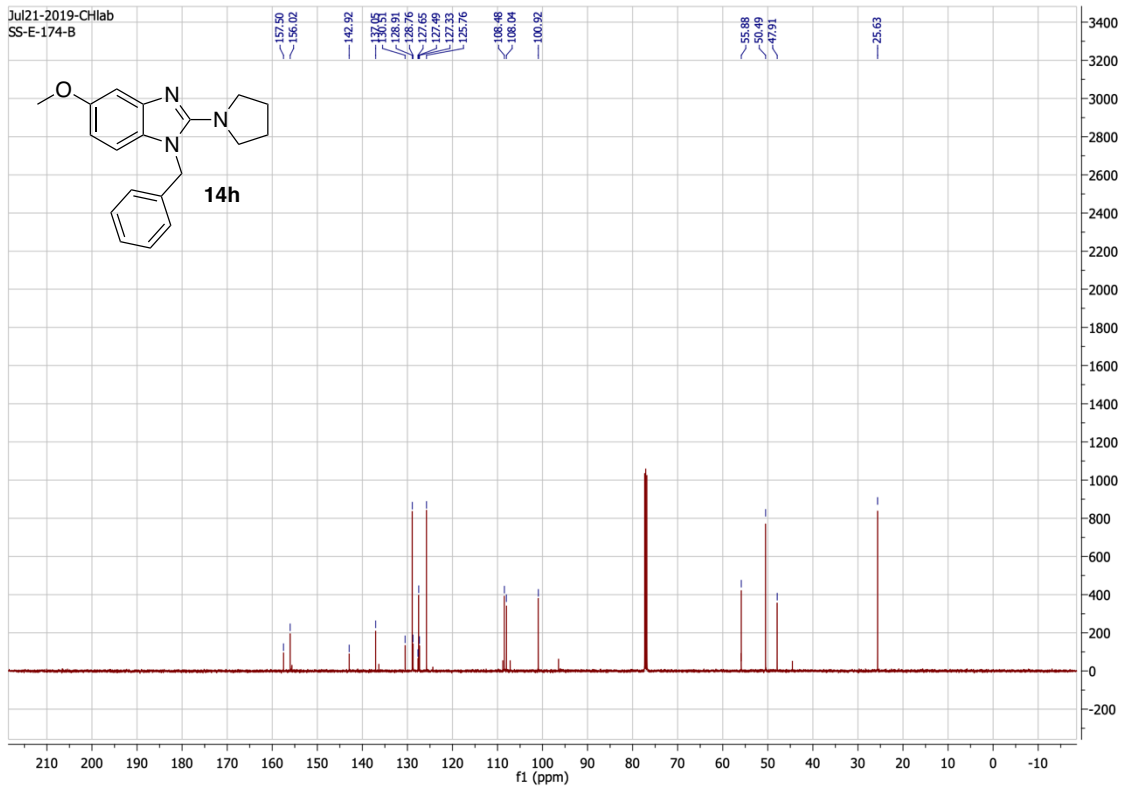

Jul21-2019-CHlab  
SS-E-174-B

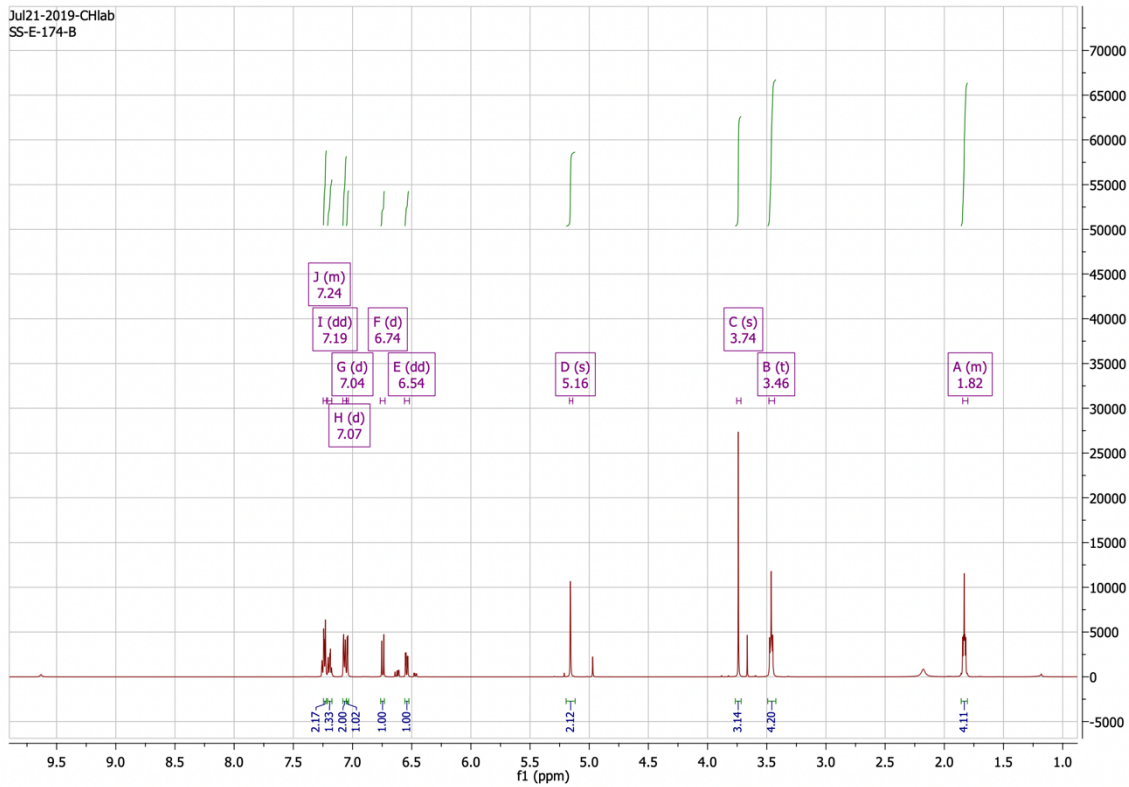

Jul21-2019-CHlab  
SS-E-175-A

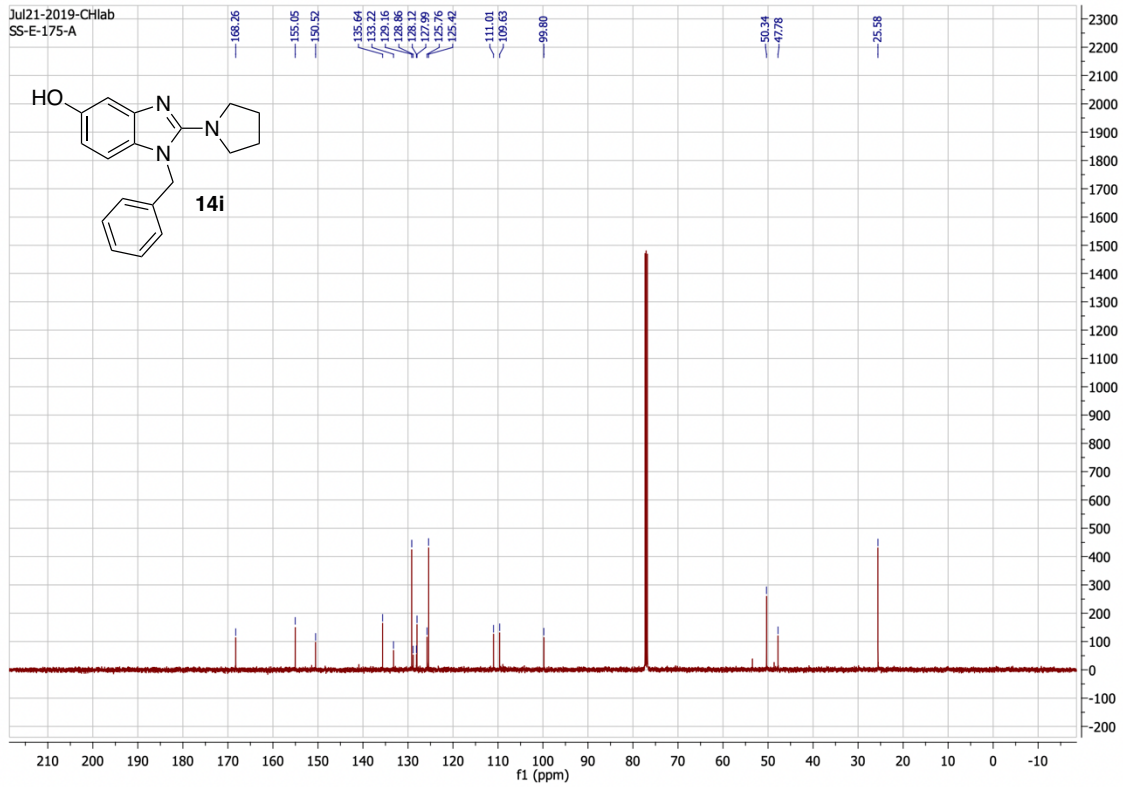

Jul20-2019-CHlab  
SS-E-175-A

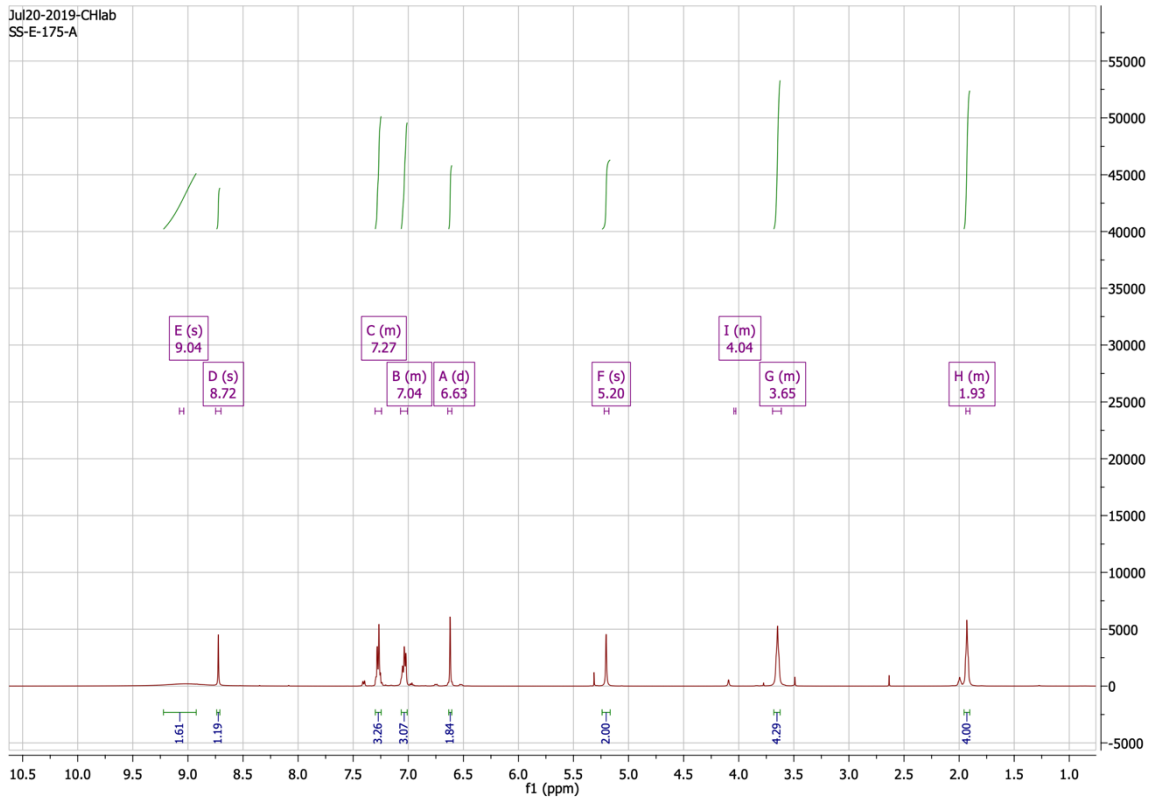

Jul21-2019-CHlab  
SS-E-178-A

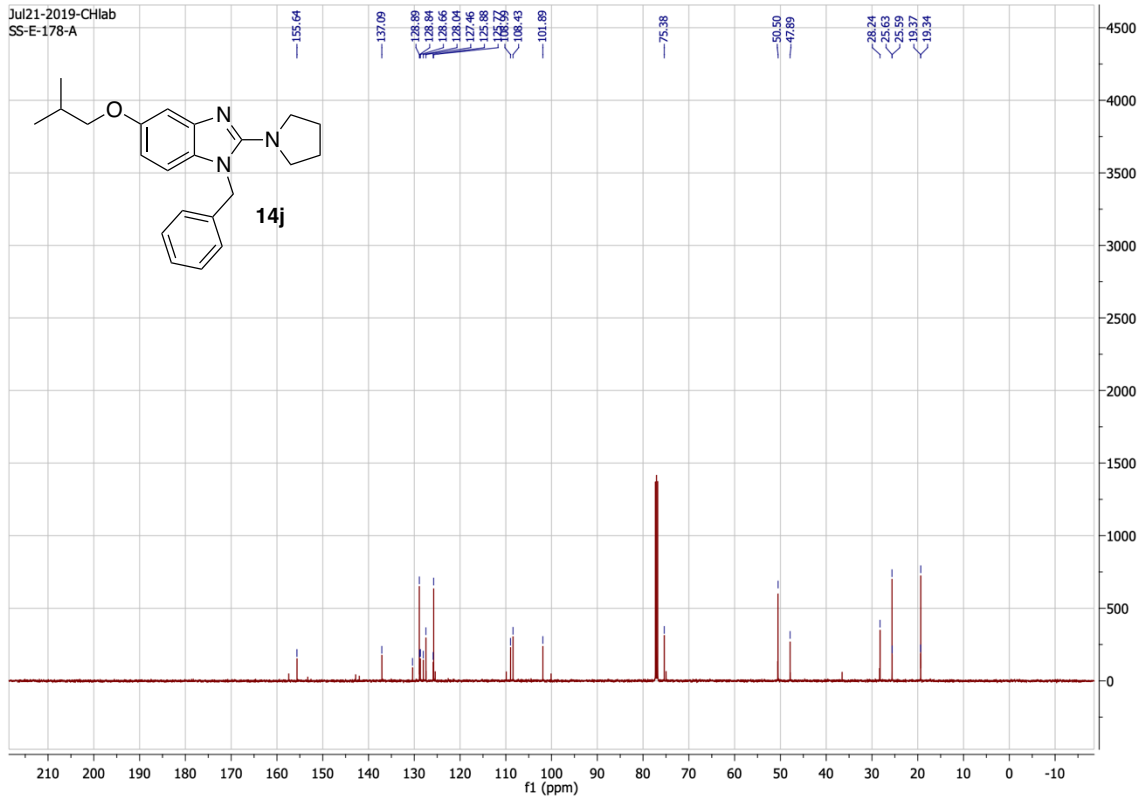

Jul21-2019-CHlab  
SS-E-178-A

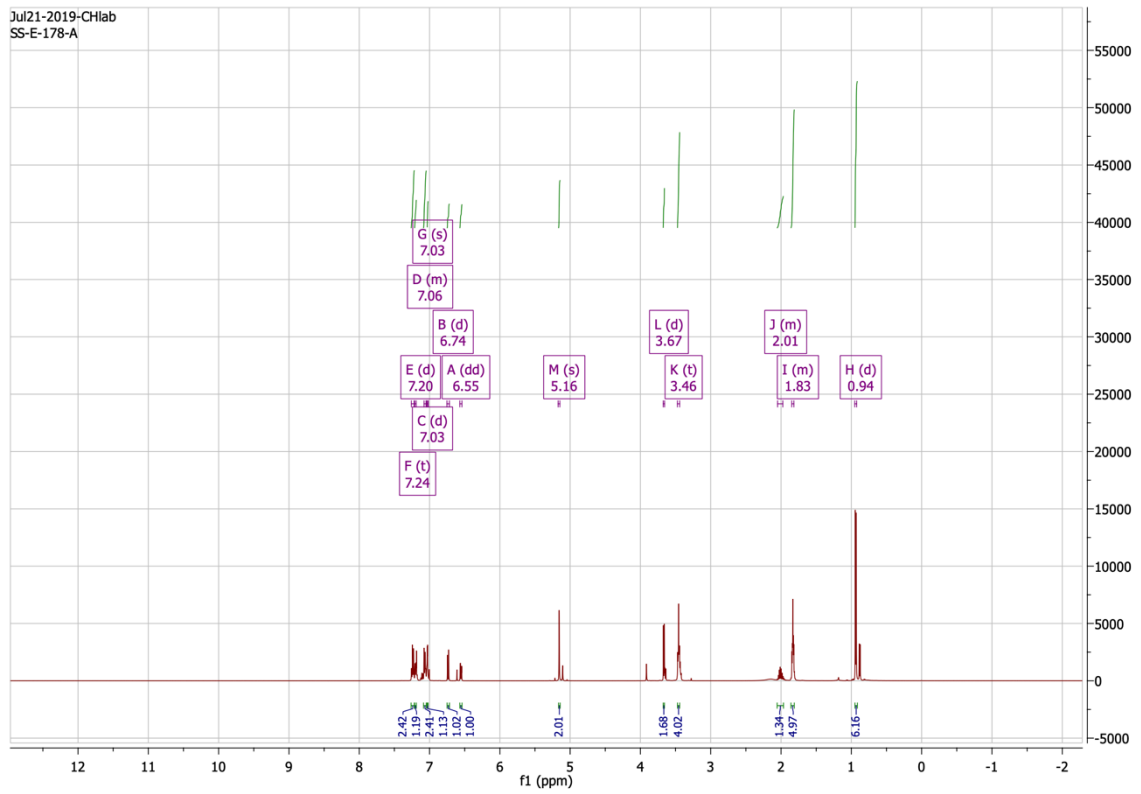

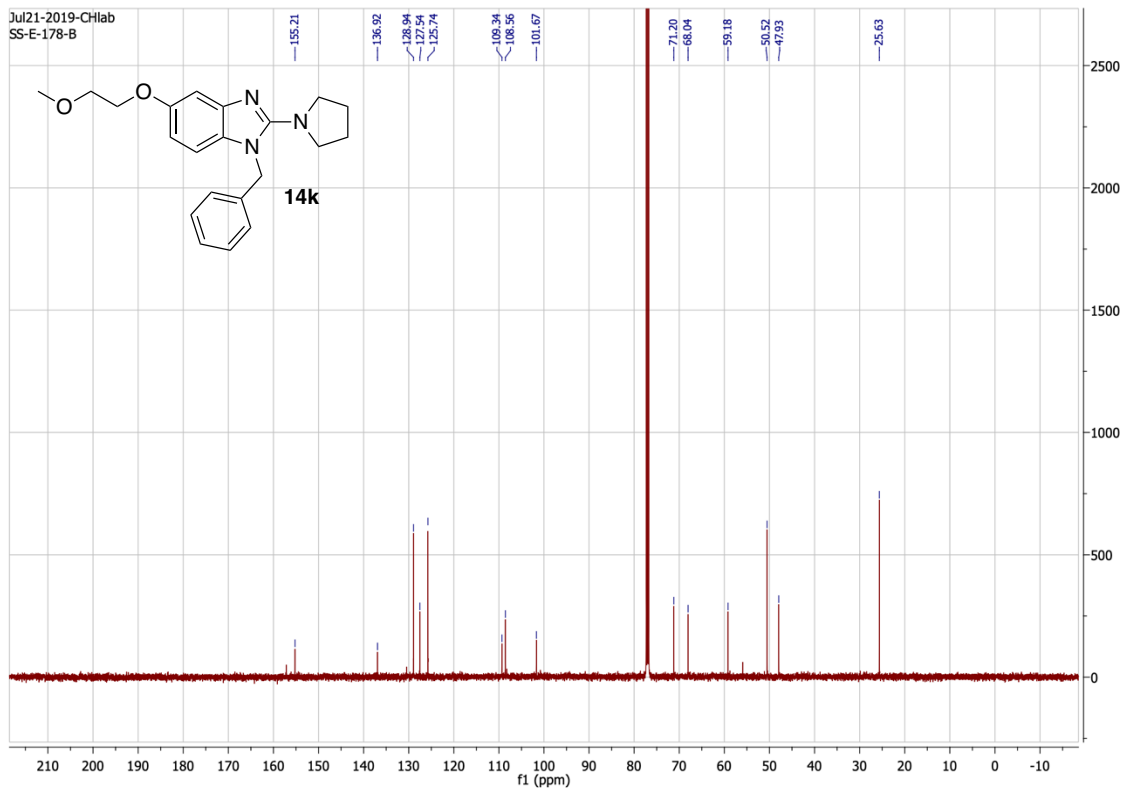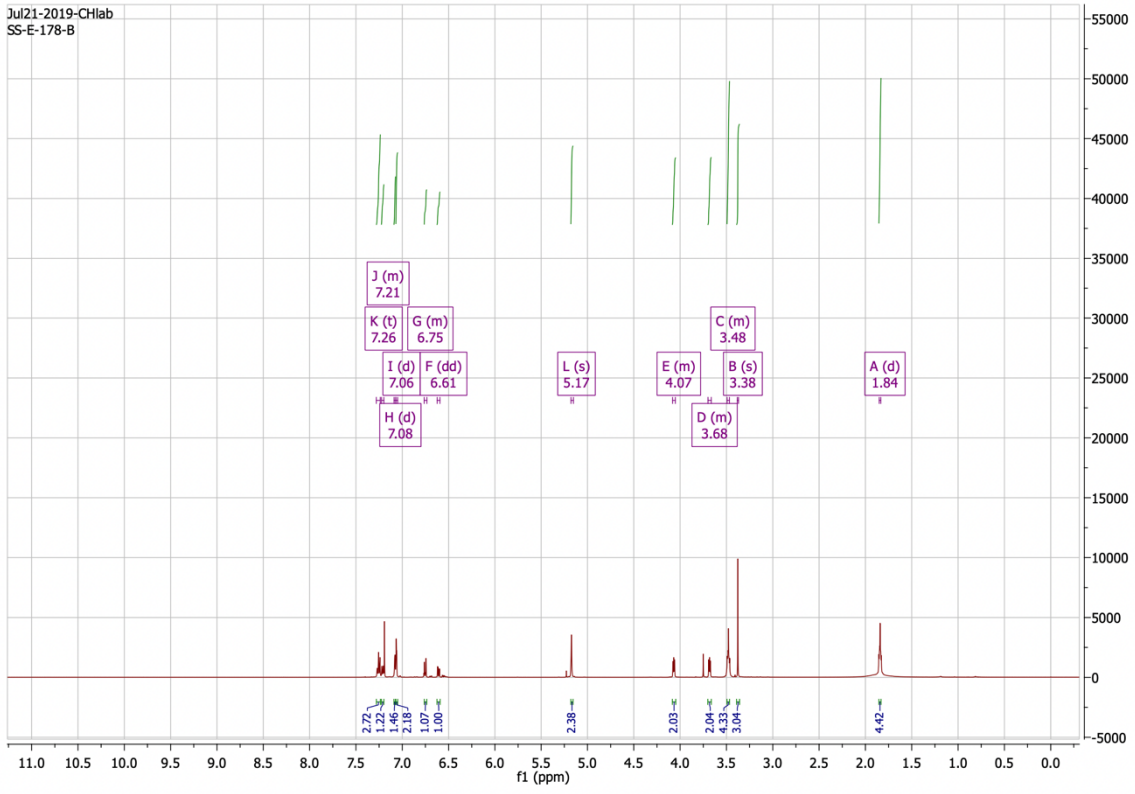



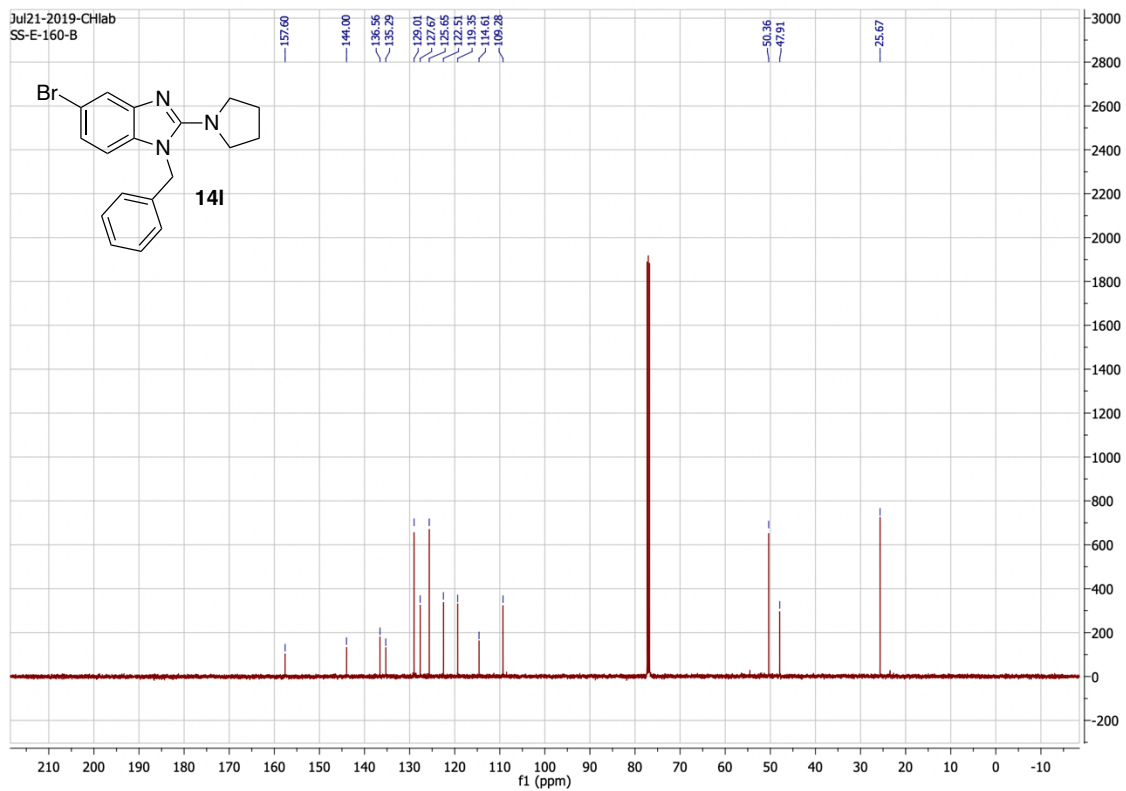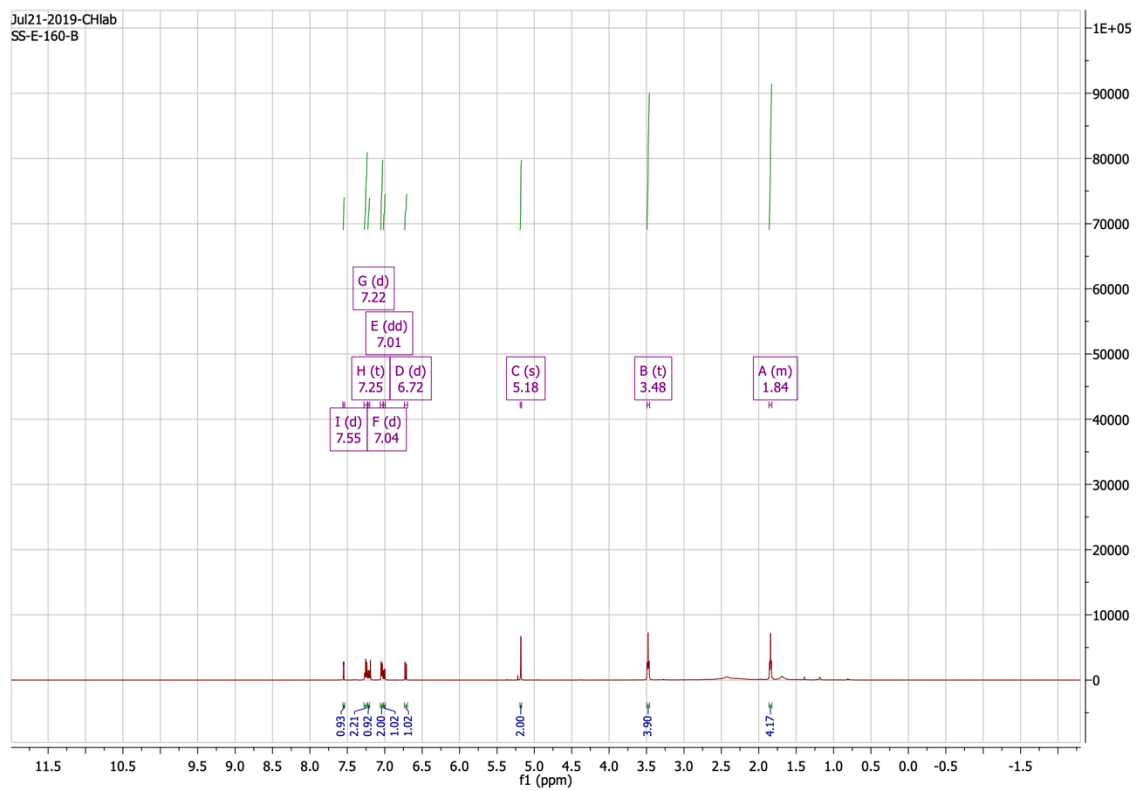

Mar18-2020-CHlab  
SS-E-182

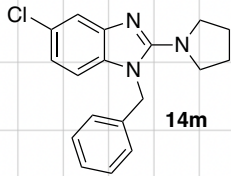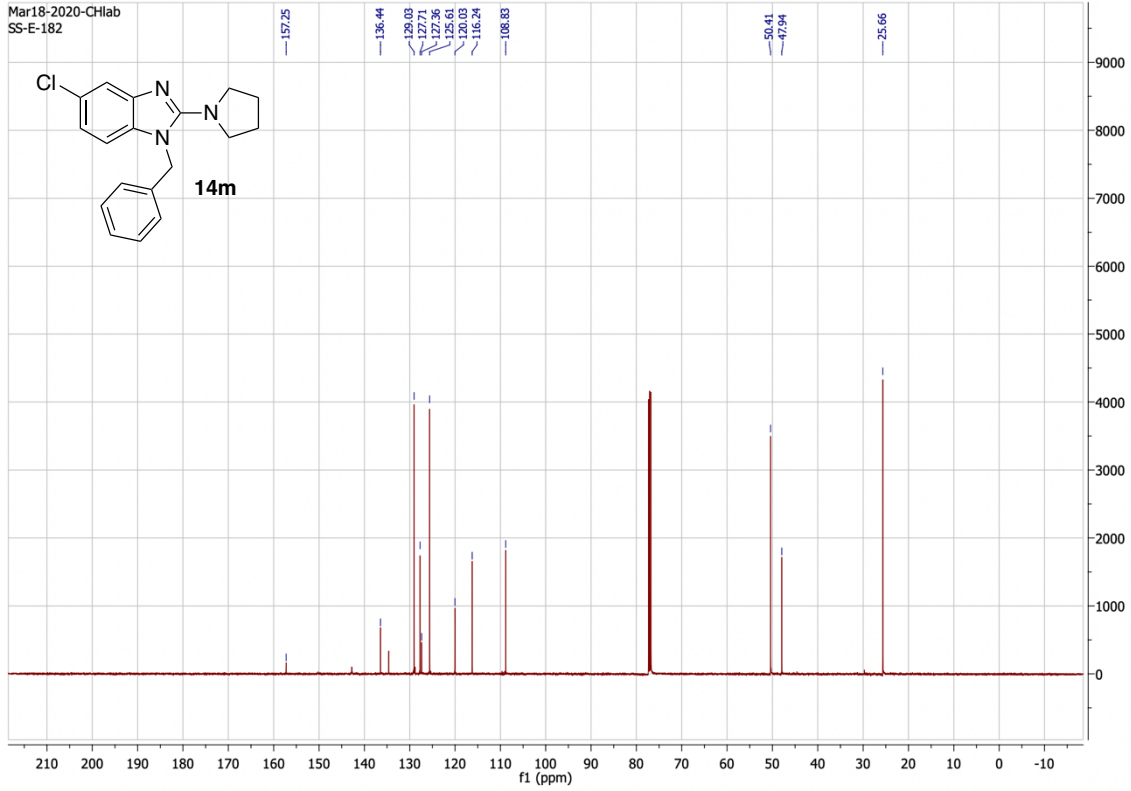

Mar18-2020-CHlab  
SS-E-182

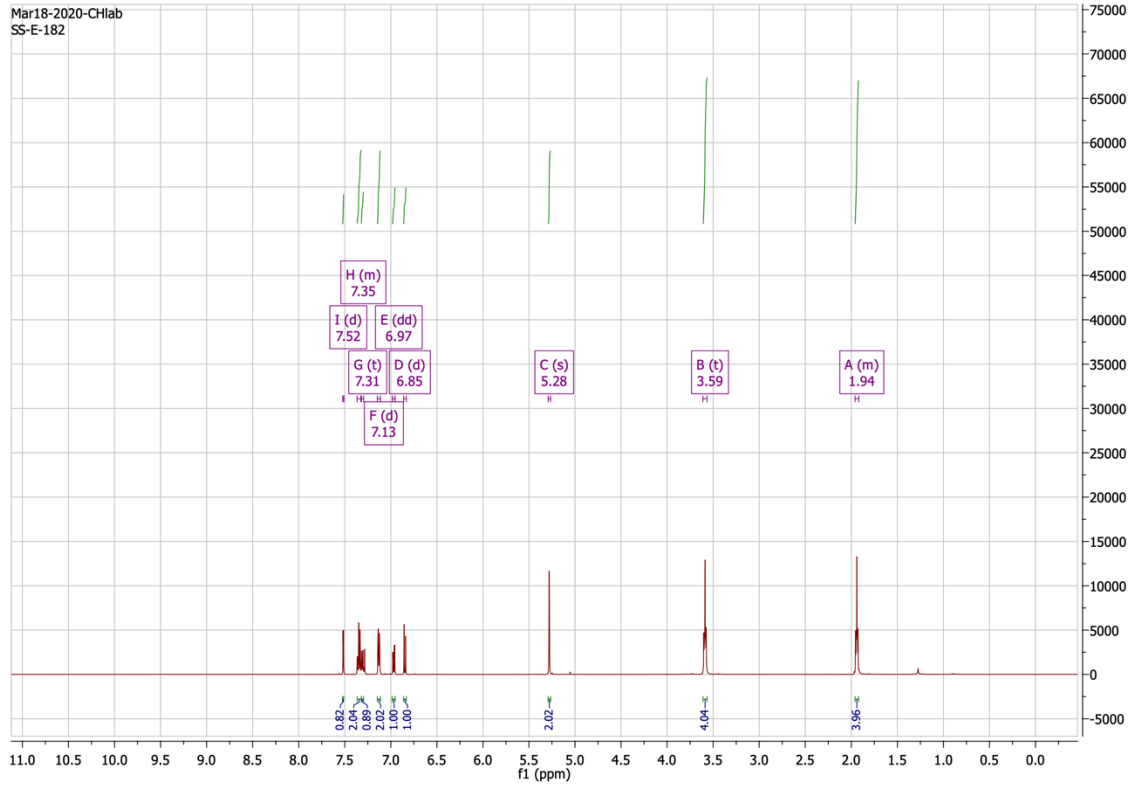

Mar20-2020-CHlab  
SS-F-13

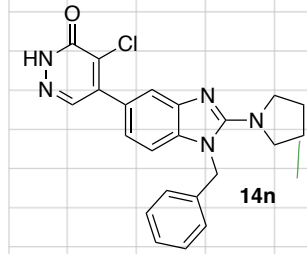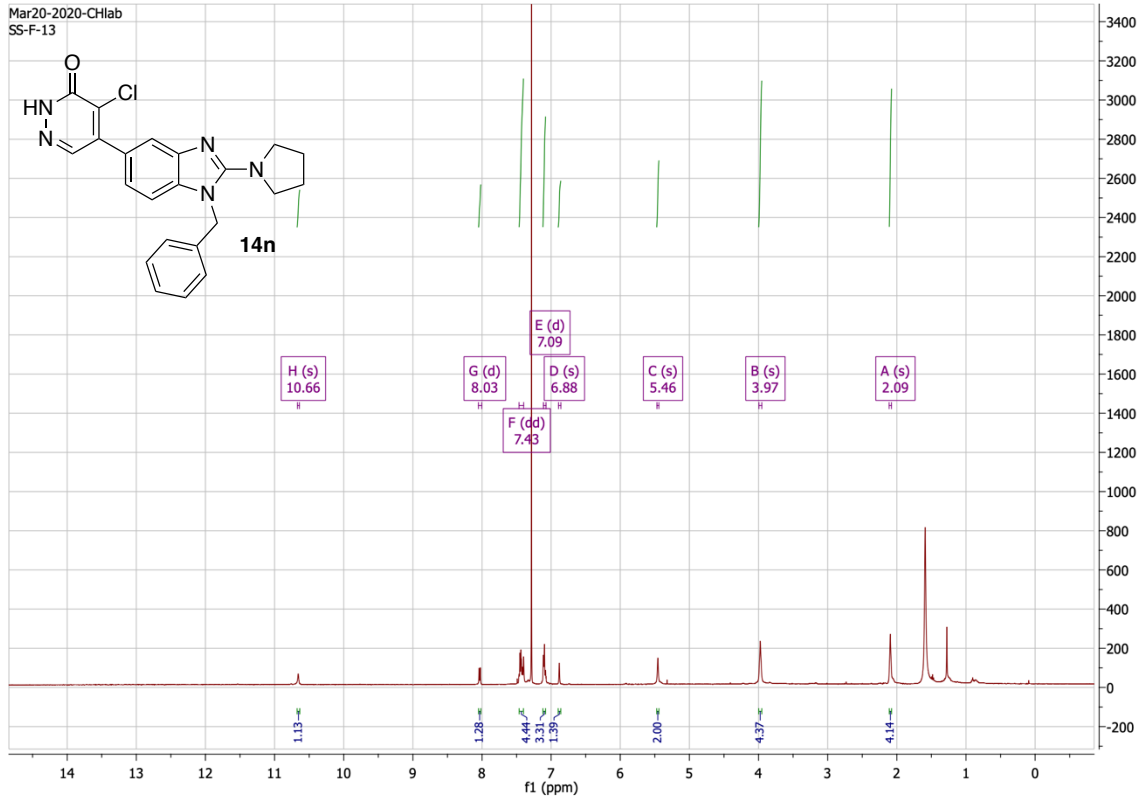

Oct15-2018  
KAT-I-14

$^{13}\text{C}$  NMR (126 MHz,  $\text{CDCl}_3$ )  $\delta$  158.12, 141.63, 135.18, 134.06, 133.39, 129.00, 127.85, 121.95, 121.72, 118.64, 109.57, 54.75, 51.00, 46.37, 33.10, 25.96, 22.33, 18.30.

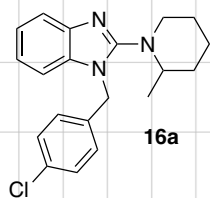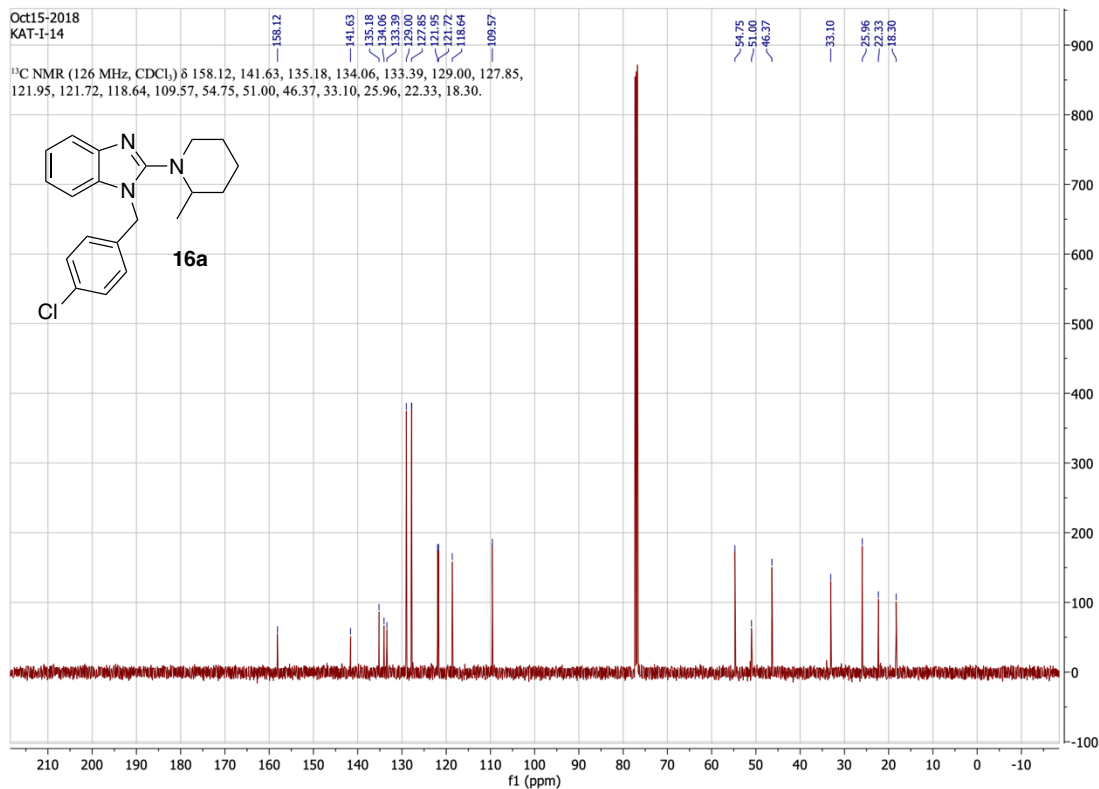

Oct15-2018  
KAT-I-14

$^1\text{H}$  NMR (499 MHz,  $\text{CDCl}_3$ )  $\delta$  7.68 (dd,  $J = 25.0, 7.9$  Hz, 1H), 7.32 – 7.28 (m, 2H), 7.25 – 7.20 (m, 1H), 7.17 – 7.09 (m, 3H), 7.05 (d,  $J = 7.9$  Hz, 1H), 5.33 – 5.16 (m, 2H), 3.51 – 3.43 (m, 1H), 3.08 (tdd,  $J = 12.1, 10.1, 4.1$  Hz, 2H), 1.89 – 1.75 (m, 3H), 1.70 – 1.60 (m, 2H), 1.58 – 1.38 (m, 2H), 1.02 (dd,  $J = 12.6, 6.4$  Hz, 3H).

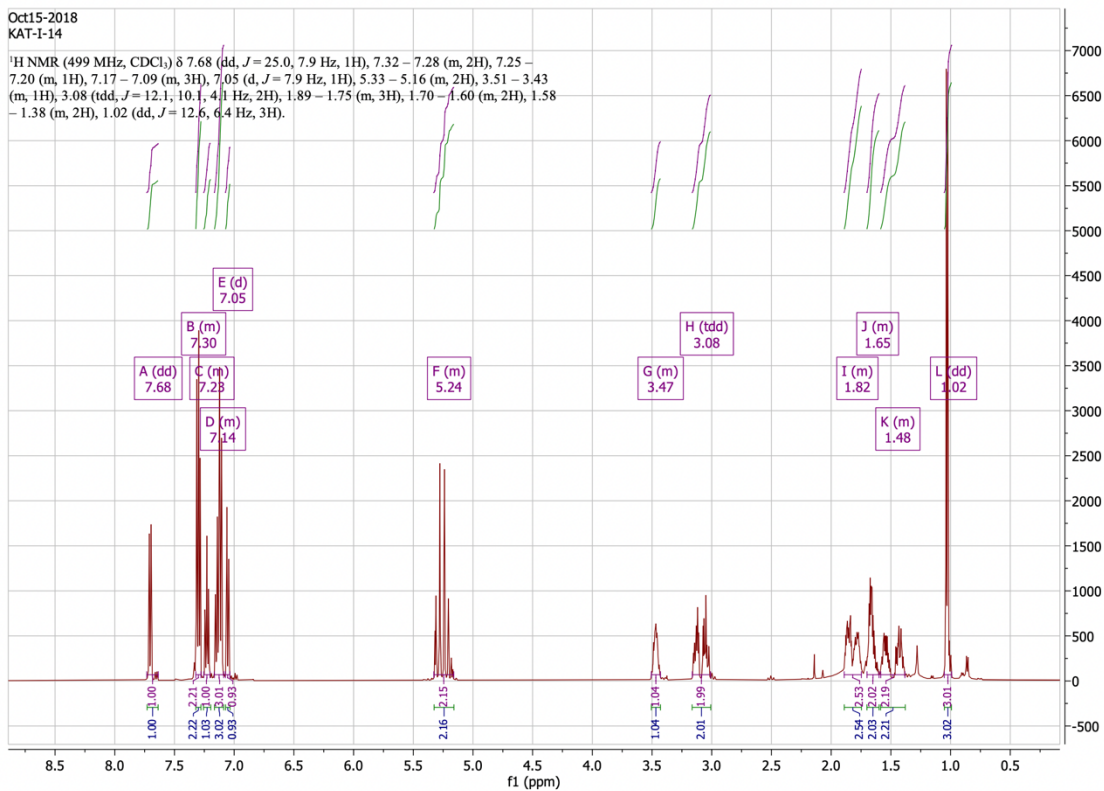

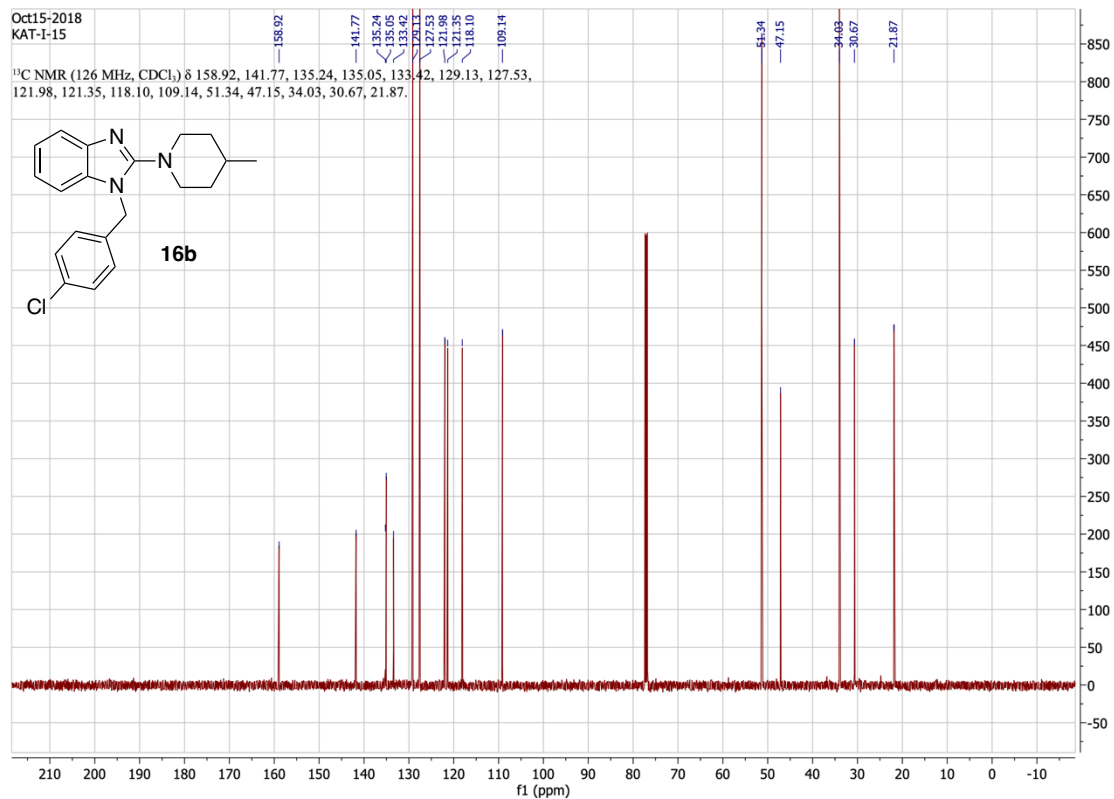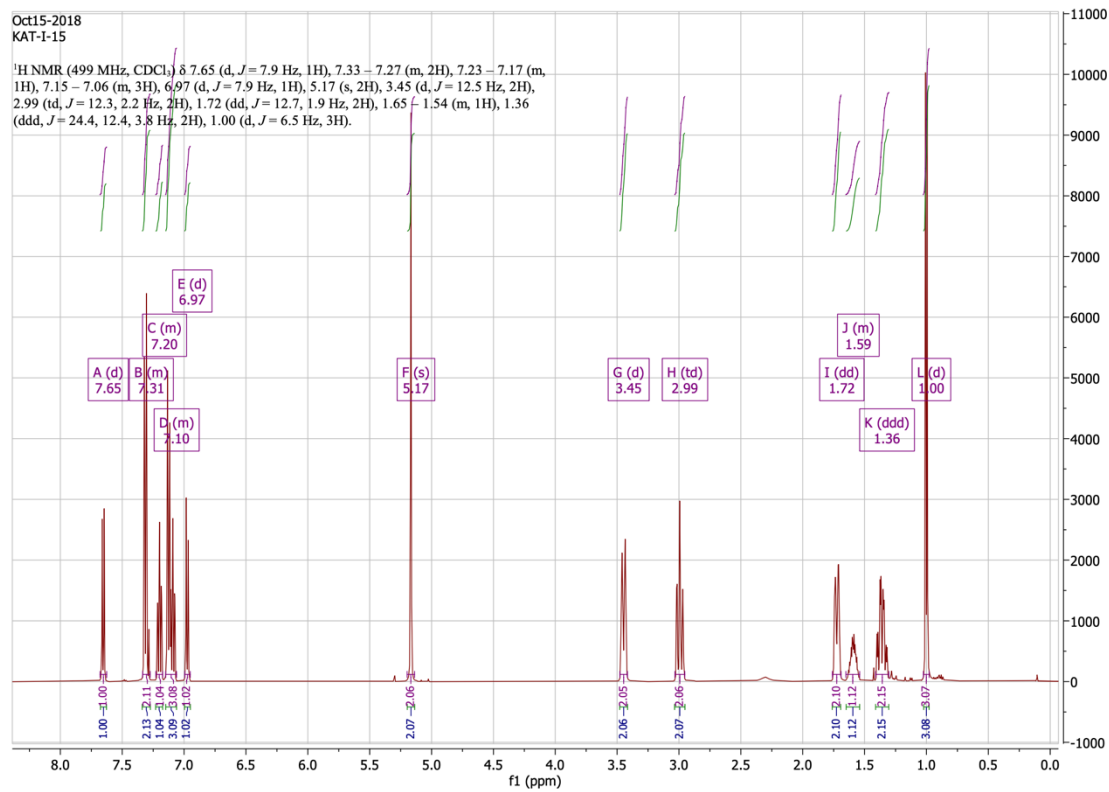

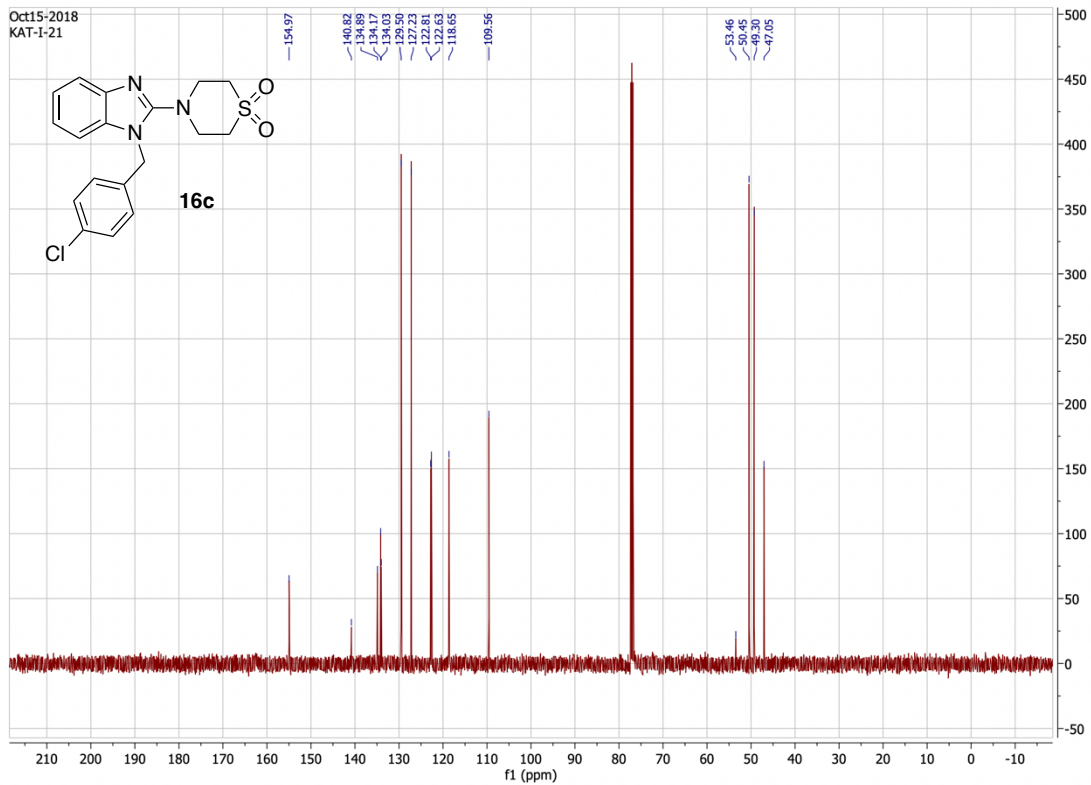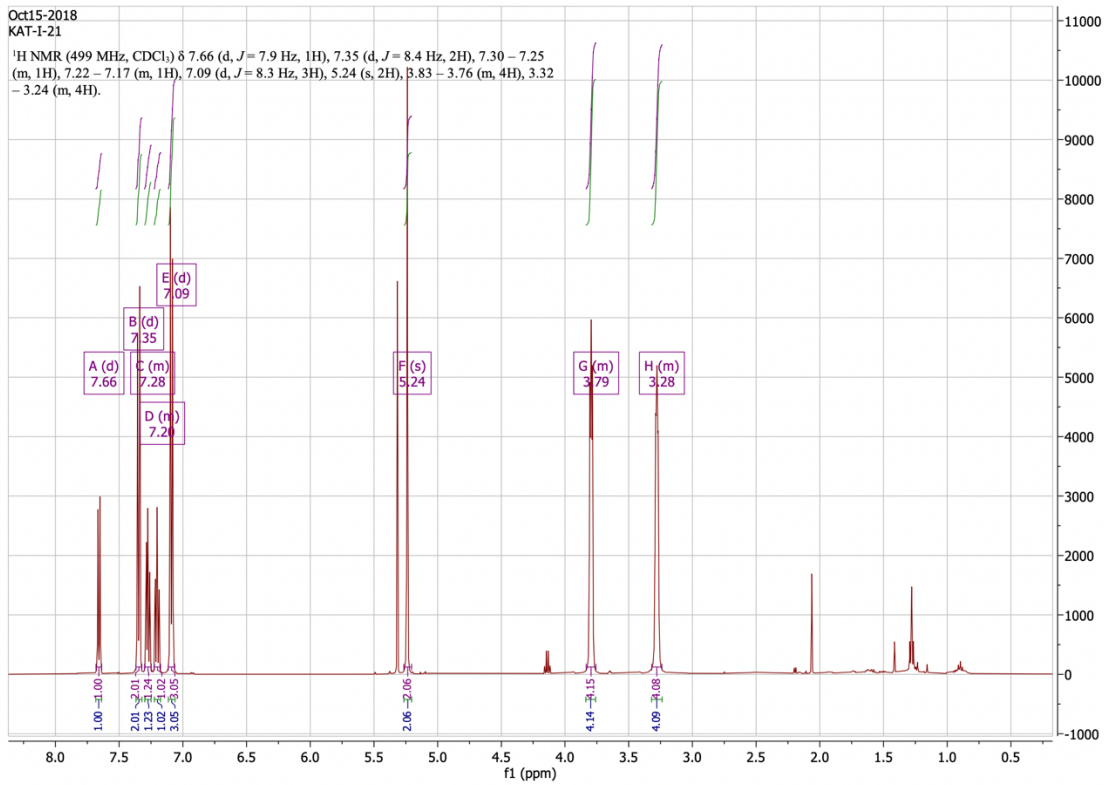

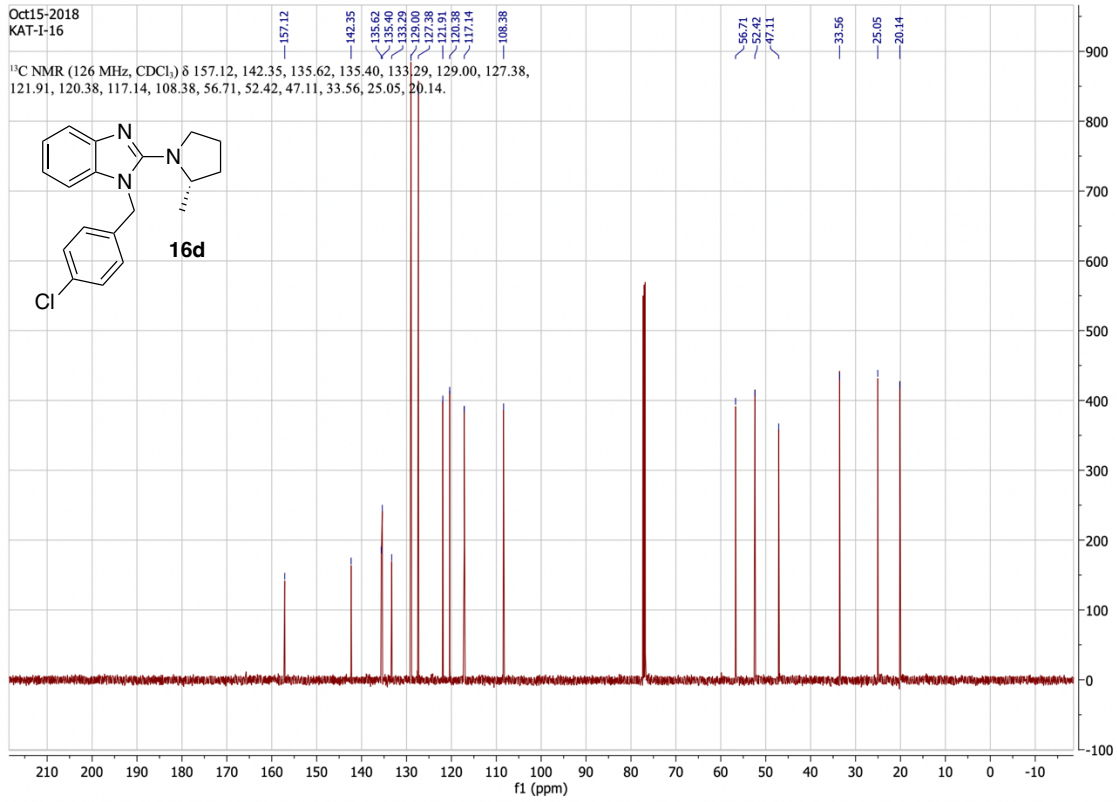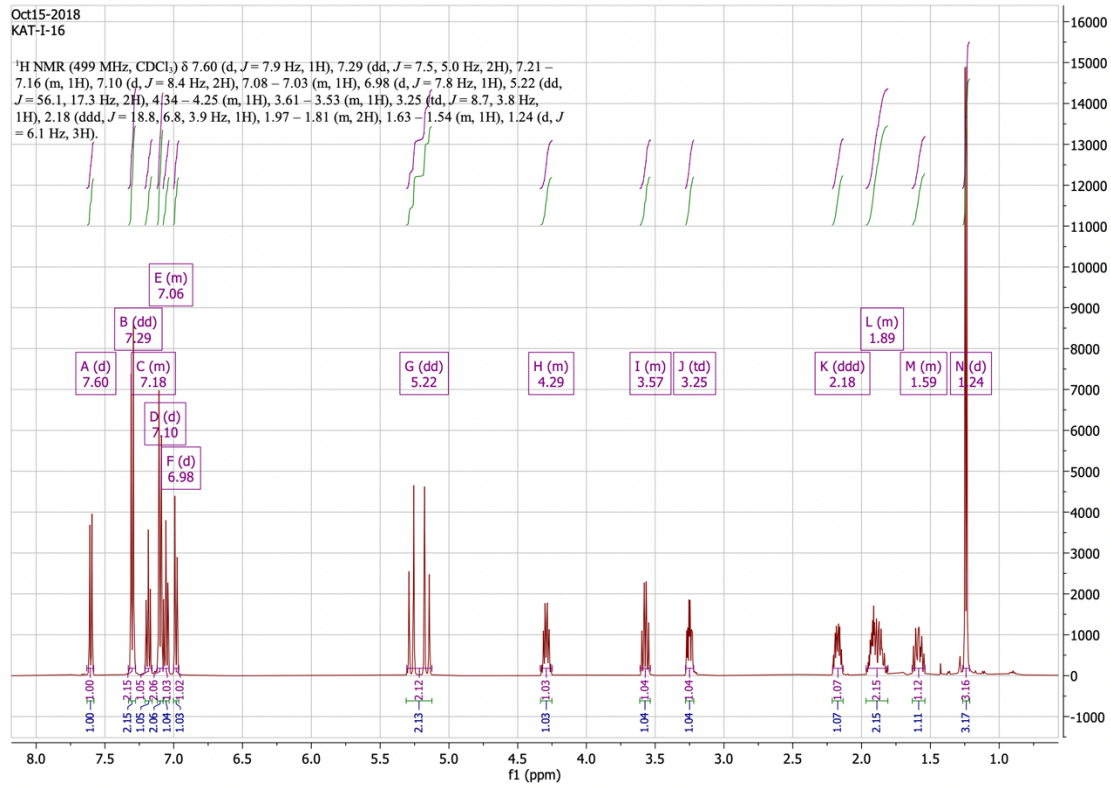

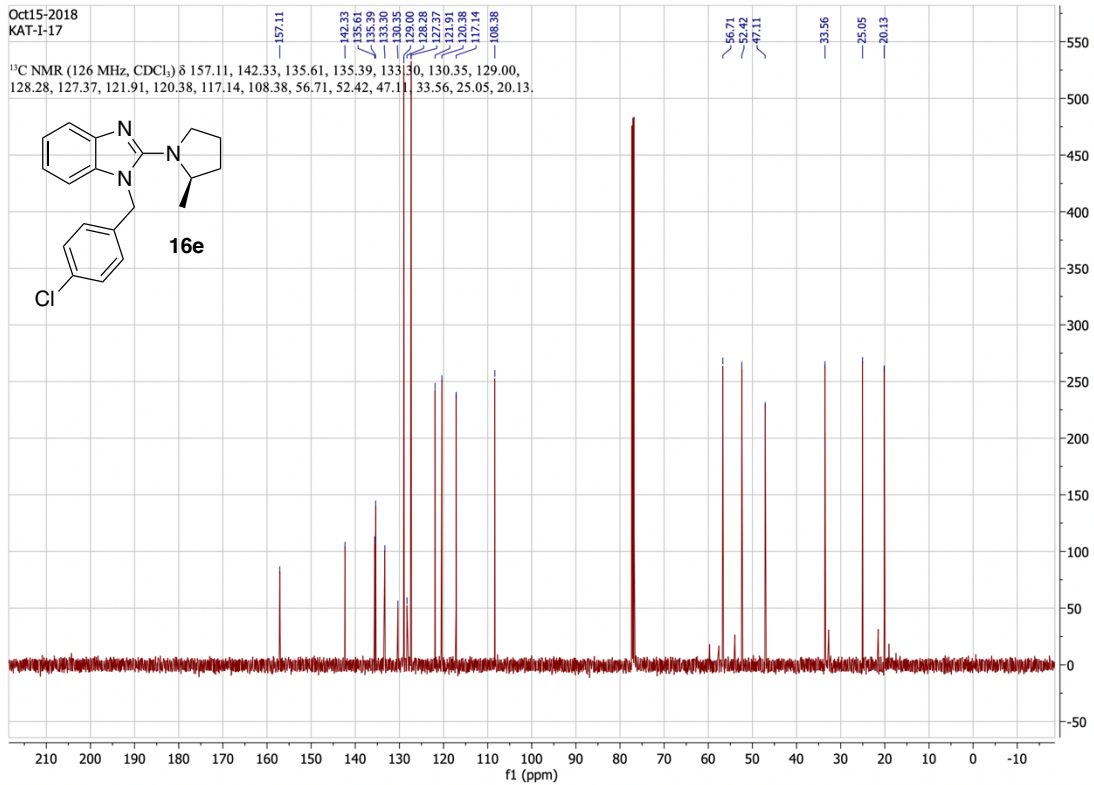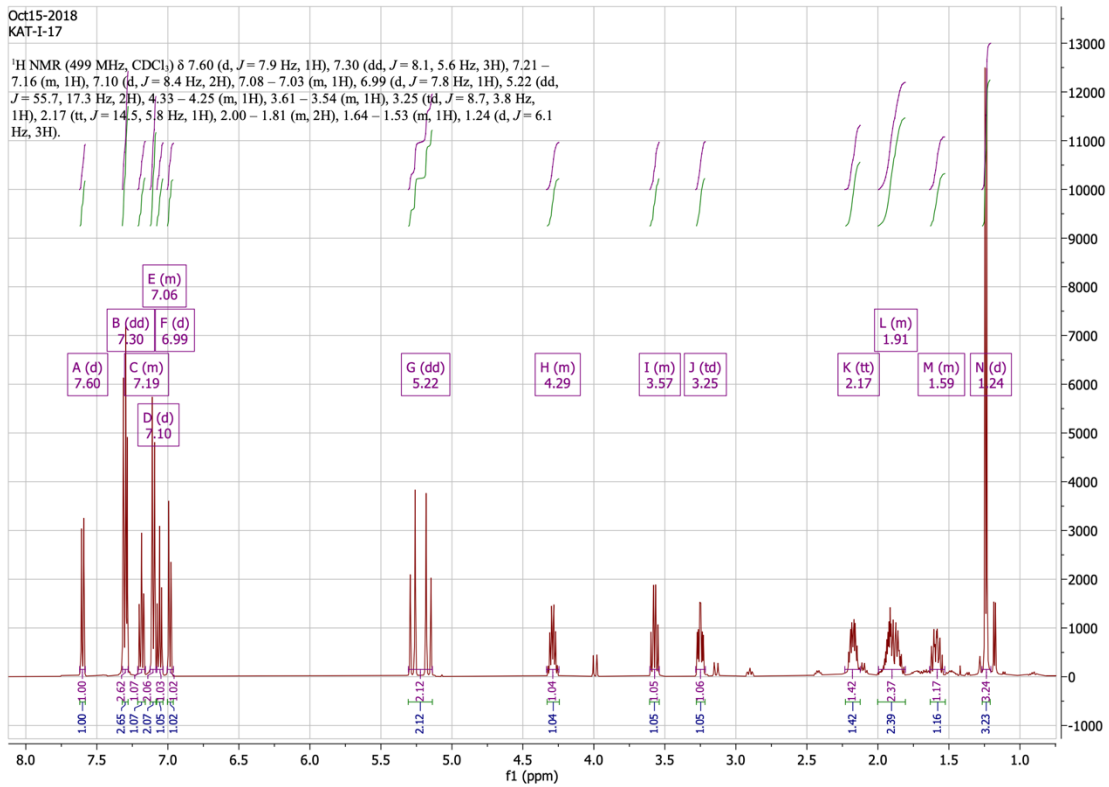



Mar23-2020-CHlab  
SS-E-64-B

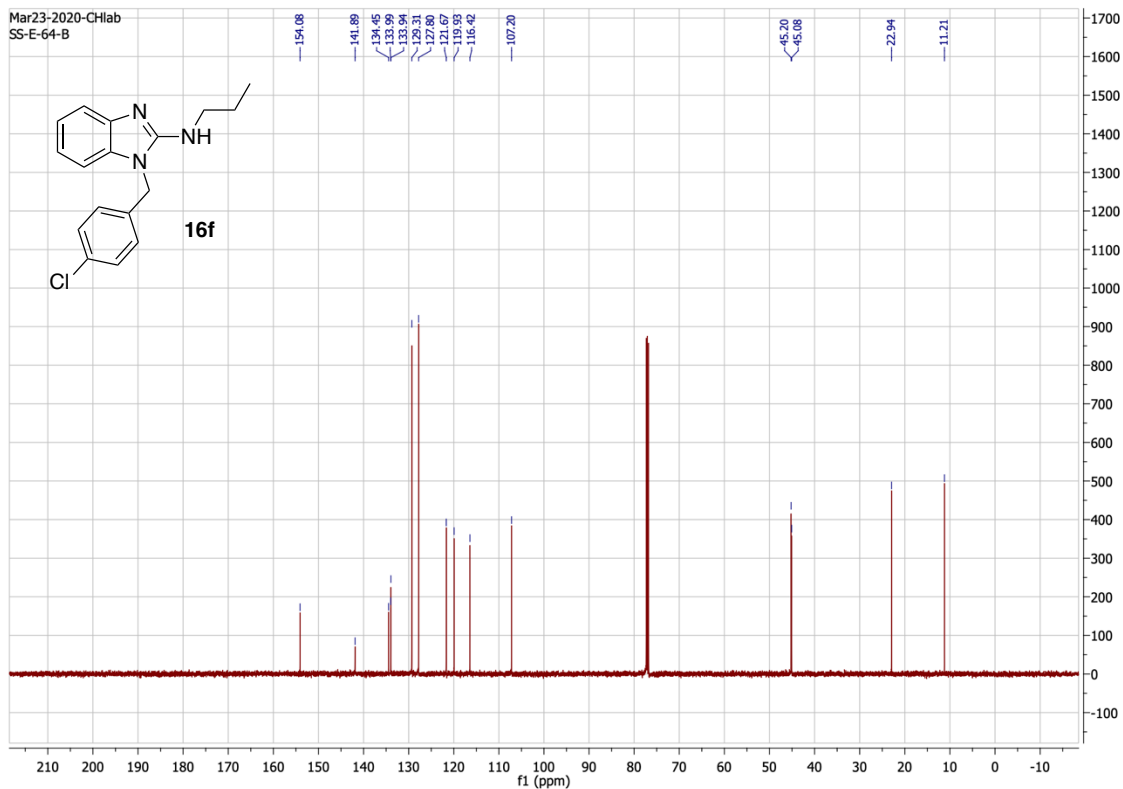

Mar23-2020-CHlab  
SS-E-64-B

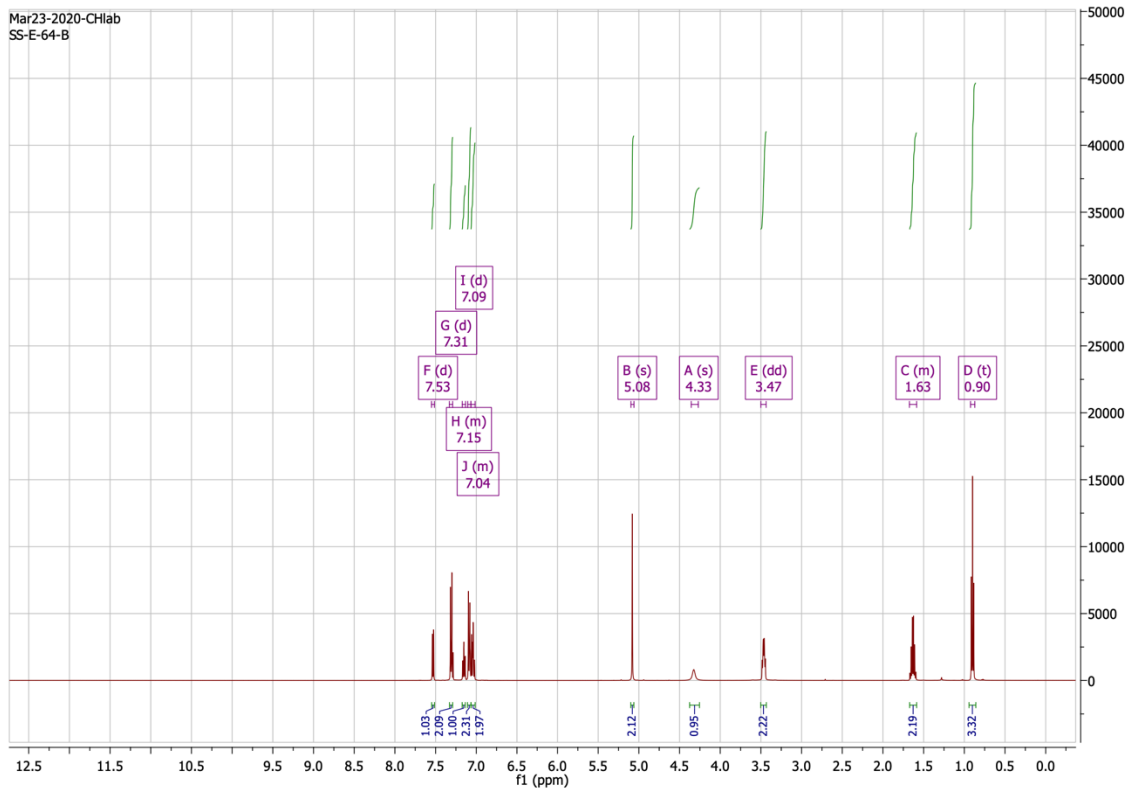

Supplement: CMDC-17-0-s001.pdf [file CMDC-17-0-s001.pdf]
